# Supplementary material for: DDCM: A Computational Strategy for Drug Repositioning Based on Support-Vector Regression Algorithm
Source: MDPI journal article supplement (doi:10.3390/ijms25105267), 2024-05-12
Supplement: s1 [file s1]

Table S5. potential therapeutic drugs for neoplasms, Table S6. potential therapeutic drugs for vascular diseases, and Table S7. major enrichment situations of genetic subgroups for potential therapeutic drug targets in NSCLC.

**Table S5.** Potential therapeutic drugs for neoplasms

| <b>Disease</b>                     | <b>Potential therapeutic drug (DrugBank ID)</b>                                                                                                                                                         |
|------------------------------------|---------------------------------------------------------------------------------------------------------------------------------------------------------------------------------------------------------|
| adrenal gland cancer               | DB04655/DB09053/DB11617/DB04944/DB00421/DB06769/DB00446/DB05260/DB00753/DB11752/DB11467/DB13811/DB08804/DB04571/DB00480/DB09199/DB09054/DB01073/DB08882/DB00925/DB00277/DB01701/DB06810                 |
| adrenocortical carcinoma           | DB01394/DB01179/DB00196/DB01217/DB00753/DB00213/DB09053/DB06448/DB01073/DB01138/DB01373/DB11890/DB11617/DB00448/DB09350/DB00446/DB05220/DB06769/DB04942/DB00727/DB11919/DB06641                         |
| bile duct cancer                   | DB01033/DB01254/DB11648/DB13014/DB01138/DB12802/DB00681/DB00477/DB06641/DB00254/DB01211/DB01700/DB05088/DB00338/DB06825/DB00302                                                                         |
| biliary tract cancer               | DB06809/DB05220/DB08889/DB02424/DB06810/DB00304/DB00443/DB09053/DB00590/DB02901/DB04348/DB15304/DB00753/DB06444/DB01357/DB01162/DB04655/DB00137/DB01177/DB11919/DB06448/DB01095/DB11251/DB00435/DB00477 |
| bone cancer                        | DB09350/DB06810/DB11890/DB00815/DB00443/DB08804/DB00213/DB14545/DB12802/DB00884/DB15334/DB04865/DB00352/DB00137/DB09053/DB09199/DB00304/DB00254/DB01138/DB13911/DB00477/DB00480/DB00338                 |
| brain cancer                       | DB11919/DB01394/DB06810/DB13014/DB01138/DB00352/DB09350/DB01033/DB04106/DB01162/DB00137/DB00254/DB13811/DB01177/DB00302/DB04944/DB01179/DB00448/DB00446/DB12874/DB11890/DB11752/DB00338/DB05220/DB09054 |
| bronchiolo-alveolar adenocarcinoma | DB00171/DB04348/DB06810/DB01179/DB02901/DB13911/DB00443/DB00134/DB00815/DB04942/DB01394/DB11919/DB11251/DB00571/DB01095                                                                                 |
| central nervous system cancer      | DB00352/DB04942/DB01179/DB01394/DB04106/DB11890/DB13014/DB06810/DB04655/DB11752/DB00254/DB09053/DB09054/DB04944/DB06176/DB00281/DB15334/DB04868/DB00446/DB01017/DB01211/DB06732/DB11919/DB01138         |
| cervical cancer                    | DB01357/DB01138/DB01162/DB12257/DB04942/DB06810/DB13014/DB00947/DB01394/DB05260/DB11919/DB05220/DB00352/DB15304/DB00448/DB00137/DB09350/DB13811/DB02424                                                 |
| colon cancer                       | DB00681/DB14322/DB01033/DB00352/DB11648/DB01073/DB00281/DB01254/DB06728/DB00470/DB11752/DB00724/DB11251/DB01698/DB01394/DB00583/DB11919/DB14545                                                         |
| connective tissue benign neoplasm  | DB13014/DB05220/DB08804/DB14545/DB00213/DB01211/DB01138/DB02375/DB00196/DB00446/DB00448/DB01073/DB007                                                                                                   |

| Disease                                    | Potential therapeutic drug (DrugBank ID)                                                                                                                                                                                                                              |
|--------------------------------------------|-----------------------------------------------------------------------------------------------------------------------------------------------------------------------------------------------------------------------------------------------------------------------|
| endometrial cancer                         | 53/DB09199/DB11251/DB00137/DB00742/DB09350/DB00947/DB01177/DB01179/DB00571/DB00470<br>DB00134/DB00947/DB01217/DB01033/DB08804/DB04571/DB04942/DB00724/DB11919/DB00421/DB11890/DB00717/DB01138/DB06412/DB01254/DB05260/DB00594/DB06732/DB00470/DB00254/DB04258/DB00352 |
| endometrial carcinoma                      | DB00717/DB00304/DB01217/DB00213/DB01073/DB00014/DB13014/DB00137/DB00815/DB04106/DB05220/DB11890/DB05088/DB01138/DB12948/DB00947/DB00571/DB00421/DB01708/DB06641/DB06176/DB02901/DB01420/DB09350/DB01698/DB00254/DB00338                                               |
| esophageal cancer                          | DB01162/DB05220/DB11919/DB00421/DB01177/DB00590/DB01394/DB06174/DB09054/DB00213/DB13811/DB01099/DB09350/DB00443/DB01217/DB00681/DB06176/DB04571/DB11648/DB01073/DB06641/DB01033/DB00448                                                                               |
| familial retinoblastoma                    | DB01179/DB01394/DB00681/DB11919/DB01254/DB04942/DB04258/DB02901/DB13014/DB01073/DB01759/DB05220/DB05260/DB00815/DB00352/DB01136/DB00477/DB06179/DB09053/DB04944/DB00014/DB01708/DB06732/DB06757                                                                       |
| female reproductive organ cancer           | DB09350/DB00137/DB05220/DB00213/DB06810/DB00448/DB14545/DB00446/DB00338/DB12948/DB04865/DB00435/DB00753/DB02375/DB00947/DB13014/DB08804/DB01136/DB00727/DB13911/DB00443/DB01357/DB05088/DB01138/DB11890                                                               |
| gallbladder cancer                         |                                                                                                                                                                                                                                                                       |
| growth hormone secreting pituitary adenoma | DB00050/DB01217/DB00421/DB01700/DB00480/DB05088/DB01420/DB06641/DB00446/DB06810/DB09054/DB00422/DB1175/DB04106/DB01357/DB06536/DB00947/DB08868/DB04868/DB08889/DB00742/DB00571                                                                                        |
| head and neck cancer                       | DB01162/DB04258/DB01177/DB09053/DB01394/DB04942/DB11890/DB13811/DB01099/DB00352/DB11919/DB09350/DB00724/DB00213/DB11752/DB01254/DB12948/DB04815/DB13911/DB11648/DB11175/DB00681/DB01033/DB00947                                                                       |
| inflammatory breast carcinoma              |                                                                                                                                                                                                                                                                       |
| intestinal cancer                          | DB00681/DB01080/DB01033/DB04258/DB11467/DB04942/DB00470/DB01254/DB00815/DB04944/DB11648/DB00443/DB01100/DB00947/DB00446/DB02901/DB05260/DB01099/DB01759/DB09350/DB01211/DB06732                                                                                       |
| invasive lobular carcinoma                 | DB00694/DB01033/DB14066/DB13911/DB06174/DB02901/DB08882/DB00938/DB01006/DB12881/DB01217/DB00909/DB00863                                                                                                                                                               |
| kidney cancer                              | DB01357/DB01162/DB08901/DB01033/DB11919/DB00213/DB01394/DB00448/DB01177/DB01138/DB05258/DB09350/DB138                                                                                                                                                                 |

| Disease                       | Potential therapeutic drug (DrugBank ID)                                                                                                                                                                                                                      |
|-------------------------------|---------------------------------------------------------------------------------------------------------------------------------------------------------------------------------------------------------------------------------------------------------------|
| large intestine cancer        | 11/DB00435/DB00863/DB06732/DB00947/DB05260/DB01100/DB06810/DB00338/DB00137<br>DB00134/DB00352/DB01254/DB01394/DB06810/DB00724/DB00681/DB11251/DB01033/DB11919/DB01177/DB01100/DB01162/DB13811/DB04258/DB02424/DB00470/DB00137/DB04944/DB11648/DB15304/DB00863 |
| larynx cancer                 | DB01033/DB00947/DB00681/DB00909/DB03057/DB01136/DB01073/DB06728/DB01162/DB02901/DB04815/DB00213/DB00884/DB09053/DB00446/DB00421/DB06176/DB13911/DB11890/DB00717/DB00753/DB01211/DB00904/DB04348/DB09350/DB00448/DB00594/DB06448/DB01017/DB00742               |
| lung benign neoplasm          | DB00470/DB01033/DB00352/DB00137/DB01708/DB12874/DB00947/DB01162/DB01254/DB11648/DB13014/DB13964/DB00863/DB06757/DB00815/DB09350                                                                                                                               |
| lung small cell carcinoma     | DB01394/DB05220/DB13014/DB01179/DB13811/DB06810/DB01162/DB09054/DB00448/DB11919/DB04865/DB00352/DB00137/DB12257/DB01138/DB04571/DB01373/DB02424/DB00863/DB00014                                                                                               |
| male breast cancer            | DB00947/DB00254/DB00443/DB00717/DB05258/DB06732/DB01217/DB00134/DB01138/DB00470/DB02901/DB00014/DB08804/DB11890/DB09350/DB08868/DB05220/DB01698/DB01373/DB04942/DB00304/DB00196                                                                               |
| malignant mesothelioma        | DB00884/DB01073/DB08901/DB04942/DB00909/DB14322/DB00352/DB01100/DB11135/DB11616/DB00877/DB06824                                                                                                                                                               |
| myasthenia gravis             | DB01033/DB06412/DB11648/DB11752/DB04571/DB00281/DB00681/DB05260/DB00480/DB00352/DB05258/DB00421/DB01211/DB01254/DB00590/DB01080/DB01177/DB01373/DB06179/DB00772/DB00431/DB13424                                                                               |
| nasopharynx carcinoma         | DB00134/DB01073/DB06179/DB04571/DB06176/DB00815/DB13014/DB11467/DB04106/DB01708/DB05088/DB02901/DB00884/DB01177/DB06732/DB05260/DB04868/DB00727/DB12874/DB06444/DB00742/DB00947/DB01254/DB01759                                                               |
| nephroblastoma                | DB01394/DB06810/DB01162/DB00137/DB04942/DB05220/DB01138/DB01179/DB00863/DB11919/DB00571/DB13811/DB13014/DB00014/DB09350/DB14545/DB05260/DB01073/DB11251/DB15304/DB00815                                                                                       |
| non-small cell lung carcinoma | DB02424/DB01394/DB01177/DB13811/DB06810/DB01254/DB06176/DB00590/DB11919/DB00448/DB01099/DB04815/DB08901/DB05220/DB04944/DB11890/DB06444/DB11648/DB01179/DB05088/DB01162/DB00352/DB00338/DB09350/DB00947                                                       |
| ovarian cancer                | DB01394/DB13014/DB01177/DB06176/DB09054/DB01138/DB08901/DB04942/DB01254/DB02424/DB01162/DB06810/DB13811/DB01357/DB00352/DB06174/DB00717/DB00421/DB11890/                                                                                                      |

| Disease                     | Potential therapeutic drug (DrugBank ID)                                                                                                                                                                                |
|-----------------------------|-------------------------------------------------------------------------------------------------------------------------------------------------------------------------------------------------------------------------|
| pancreatic cancer           | DB01017/DB05220/DB00947/DB06641<br>DB00470/DB04942/DB04106/DB01177/DB01073/DB02424/DB01179/DB11919/DB06810/DB04944/DB00196/DB00681/DB06757/DB02375/DB00724/DB06176/DB01254/DB00435/DB04258/DB08804/DB09350              |
| pancreatic carcinoma        | DB00884/DB00571/DB04258/DB00855/DB00553/DB01073/DB06536/DB11919/DB04655/DB06176/DB09054/DB08804/DB13911/DB01356/DB00780/DB00724/DB01095/DB14322                                                                         |
| pancreatic ductal carcinoma | DB06444/DB00304/DB00717/DB01254/DB02424/DB05088/DB06448/DB00134/DB01177/DB00724/DB01357/DB06810/DB00863/DB06412/DB01211/DB01373/DB05260/DB08901/DB00947/DB00448/DB01708/DB15304/DB12948/DB01073/DB09054                 |
| parathyroid carcinoma       | DB00904/DB09054/DB01073/DB06769/DB00277/DB00437/DB00242/DB01033/DB00352/DB09053/DB00938                                                                                                                                 |
| penile cancer               | DB13014/DB06412/DB01138/DB00435/DB09054/DB01179/DB06174/DB08868/DB00014/DB03068/DB15334/DB05220/DB13911/DB06176/DB03057/DB00304/DB08889/DB04571/DB12802/DB04655/DB13964/DB14322/DB01017                                 |
| pituitary cancer            | DB01357/DB00947/DB09350/DB00422/DB01100/DB00050/DB00909/DB08804/DB00443/DB08889/DB01698/DB00338/DB00014/DB00421/DB08882/DB06810/DB01708/DB01217/DB06732/DB00571/DB01420/DB15334/DB08868/DB00863/DB00171/DB06809/DB00717 |
| pleural cancer              | DB00717/DB00254/DB01373/DB05258/DB00304/DB00137/DB08868/DB11890/DB08804/DB11752/DB06728/DB01138/DB00470/DB00480/DB01217/DB01698/DB00571/DB06809/DB11467/DB13014/DB00884/DB08901/DB01177/DB00422/DB11617                 |
| prolactinoma                | DB00422/DB00947/DB09350/DB01217/DB06767/DB00050/DB01100/DB01420/DB01357/DB01700/DB06810/DB00338/DB11175/DB01708/DB00480/DB06732/DB00477/DB00909/DB01080/DB01698/DB04868/DB08901                                         |
| rectal neoplasm             | DB01033/DB01254/DB00681/DB11648/DB04571/DB00421/DB06412/DB01394/DB01211/DB00422/DB00717/DB00909/DB01099/DB08889/DB09054/DB06174/DB14322/DB04868/DB05258/DB00815/DB01138/DB06809/DB11251                                 |
| renal cell carcinoma        | DB00134/DB01394/DB06810/DB11919/DB05220/DB06809/DB04944/DB01162/DB01177/DB01254/DB04655/DB01138/DB01100/DB04942/DB02424/DB11890/DB06412/DB00137/DB05260                                                                 |
| skin benign neoplasm        | DB04942/DB14545/DB00470/DB00281/DB02375/DB09350/DB11251/DB00815/DB06810/DB01073/DB02901/DB00213/DB04106/DB08868/DB00352/DB13014/DB01708/DB00904/DB00681/DB01179/DB00742/DB03068/DB06757                                 |
| skin melanoma               | DB00553/DB00855/DB04655/DB04571/DB00806/DB00242/DB                                                                                                                                                                      |

| Disease                |           | Potential therapeutic drug (DrugBank ID)                                                                                                                                                                                                |
|------------------------|-----------|-----------------------------------------------------------------------------------------------------------------------------------------------------------------------------------------------------------------------------------------|
| stomach cancer         |           | 00307/DB02546/DB00188/DB06176/DB08868/DB01268/DB01590/DB05258/DB08901/DB03057/DB00744/DB04868/DB01373/DB01254/DB00877/DB01080                                                                                                           |
|                        |           | DB00134/DB01162/DB09054/DB01254/DB06448/DB00863/DB09053/DB00753/DB11648/DB01017/DB11251/DB00281/DB08804/DB08901/DB00448/DB00470/DB13964/DB01099/DB04258/DB14322/DB01073                                                                 |
| supratentorial cancer  |           | DB01394/DB13014/DB01179/DB00681/DB04942/DB09054/DB06728/DB09053/DB00254/DB01177/DB11467/DB06810/DB01708/DB03057/DB00421/DB01073/DB06769/DB00742/DB12948/DB11919/DB09350/DB00724/DB00338/DB01138/DB06179/DB00014/DB01759                 |
| testicular cancer      |           | DB01394/DB06810/DB05220/DB01179/DB01162/DB13811/DB09350/DB01177/DB04942/DB11919/DB00863/DB01136/DB00947/DB01138/DB00571/DB05260/DB00137/DB01100/DB15304/DB00448/DB01373/DB04865/DB02424/DB11251                                         |
| thymoma                |           | DB00050/DB04106/DB11467/DB05088/DB09054/DB01217/DB00446/DB06641/DB00590/DB08804/DB06810/DB00480/DB01420/DB01136/DB04868/DB01700/DB00196/DB00947/DB06536/DB01162/DB00352/DB15304/DB12802/DB01698                                         |
| thymus cancer          |           | DB00531/DB00290/DB00570/DB00755/DB00541/DB00724/DB12948/DB14545/DB06810/DB06536/DB11648/DB14066/DB00681/DB08868/DB04865/DB11617/DB06174/DB12802/DB04690/DB03057/DB01033/DB01254/DB01211/DB04655/DB13323/DB04571/DB13014/DB08901/DB01420 |
| thyroid cancer         |           | DB00594/DB04942/DB06174/DB01394/DB00352/DB00681/DB11617/DB00724/DB01179/DB04944/DB04865/DB11890/DB06176/DB08901/DB06448/DB00213/DB12802/DB00470/DB06728/DB04258/DB00590/DB04868                                                         |
| thyroid carcinoma      | medullary | DB01254/DB00909/DB02424/DB03068/DB08804/DB00724/DB11648/DB00947/DB00352/DB12948/DB08901/DB01700/DB01073/DB00884/DB01373/DB09053/DB04942/DB00196/DB06176/DB11752/DB01017/DB12874/DB00134/DB01217/DB00681/DB00727/DB11919                 |
| tongue cancer          |           | DB04942/DB00338/DB00352/DB01254/DB09350/DB11467/DB00947/DB00815/DB01073/DB06176/DB01759/DB02901/DB08868/DB00909/DB01708/DB05260/DB04258/DB00443/DB06179/DB06732/DB04868/DB06769                                                         |
| urinary bladder cancer |           | DB05220/DB09350/DB13014/DB01394/DB01177/DB11919/DB01179/DB01138/DB01033/DB00681/DB08804/DB06810/DB08882/DB11890/DB00947/DB01698/DB01254/DB00435/DB05260/DB00338/DB11251                                                                 |
| urinary system benign  |           | DB06728/DB00681/DB00213/DB00137/DB09053/DB05260/DB                                                                                                                                                                                      |

| <b>Disease</b> | <b>Potential therapeutic drug (DrugBank ID)</b>                                                                                                                                                         |
|----------------|---------------------------------------------------------------------------------------------------------------------------------------------------------------------------------------------------------|
| neoplasm       | 00724/DB12948/DB09199/DB11467/DB04258/DB11919/DB01759/DB00884/DB00254/DB01073/DB13014/DB01179/DB01136/DB05220/DB03057                                                                                   |
| uterine cance  | DB00947/DB01100/DB01073/DB11890/DB01217/DB00717/DB09350/DB11251/DB00904/DB01254/DB00050/DB09199/DB04815/DB13014/DB00884/DB01138/DB00470/DB04571/DB02424                                                 |
| uveal melanoma | DB04868/DB08882/DB09350/DB08901/DB00753/DB05260/DB04942/DB00134/DB00724/DB00435/DB01254/DB11617/DB01080/DB13964/DB06179/DB01017/DB01100/DB06174/DB00338/DB00050/DB00422/DB00470/DB11752/DB12802/DB06448 |

**Table S6.** Potential therapeutic drugs for vascular diseases

| <b>Disease</b>                     | <b>Potential therapeutic drug (DrugBank ID)</b>                                                                                                                                                         |
|------------------------------------|---------------------------------------------------------------------------------------------------------------------------------------------------------------------------------------------------------|
| abdominal aortic aneurysm          | DB01219/DB00332/DB00523/DB14574/DB00104/DB11673/DB06212/DB00796/DB13243/DB14015/DB00897/DB00761/DB04557/DB09153/DB01174/DB00143/DB07352/DB06155                                                         |
| angioedema                         | DB09477/DB00989/DB00214/DB11742/DB04953/DB00567/DB00243/DB00927/DB00415/DB01611/DB05549/DB00261/DB00694/DB00557/DB00983/DB12693/DB00313                                                                 |
| anterior ischemic optic neuropathy | DB00477/DB00332/DB00261/DB14015/DB00796/DB00934/DB00845/DB13504/DB13243/DB11326/DB00431/DB00545/DB02315/DB01149/DB13323/DB00653/DB00284/DB13723/DB11152                                                 |
| aortic aneurysm                    | DB00204/DB00143/DB00557/DB00254/DB01074/DB13323/DB01288/DB00796/DB05549/DB04557/DB01015/DB00934/DB00285/DB01413/DB12870/DB02806/DB09086                                                                 |
| aortic disease                     | DB09313/DB01268/DB05088/DB01219/DB06155/DB00254/DB01171/DB13863/DB09153/DB11829/DB00313/DB13108/DB00927/DB11326/DB01174/DB13781/DB03843/DB02315                                                         |
| arteriosclerosis                   | DB00380/DB00261/DB04861/DB00543/DB13781/DB01053/DB04104/DB00687/DB01235/DB01184/DB00910/DB04953/DB00332/DB12422/DB01233/DB00431/DB01288/DB09086/DB00746/DB01159/DB06155/DB13723                         |
| ataxia telangiectasia              | DB01191/DB01429/DB01611/DB00746/DB00313/DB05382/DB00248/DB01174/DB00579/DB14574/DB01195/DB01356/DB00908/DB01064/DB06810/DB00325/DB00247/DB09152                                                         |
| atherosclerosis                    | DB08860/DB00502/DB04557/DB00910/DB00284/DB13323/DB08839/DB00694/DB12870/DB00988/DB06155/DB00431/DB00523/DB09153/DB09477/DB00761/DB00143/DB00796/DB00439/DB01954/DB00171/DB00752/DB11588/DB00845/DB08841 |
| Behcet's disease                   | DB00681/DB01611/DB08809/DB12422/DB13110/DB11387/DB00313/DB01189/DB01233/DB05015/DB00431/DB09086/DB11673/DB00780/DB15584/DB01400/DB01015/DB01171/DB13682                                                 |
| brain infarction                   | DB00502/DB00574/DB01100/DB00243/DB00204/DB00910/DB                                                                                                                                                      |

| Disease                   | Potential therapeutic drug (DrugBank ID)                                                                                                                                                                                                                         |
|---------------------------|------------------------------------------------------------------------------------------------------------------------------------------------------------------------------------------------------------------------------------------------------------------|
| brain ischemia            | 00813/DB00794/DB01233/DB00279/DB12693/DB00780/DB00934/DB08839/DB00681/DB00527/DB13108<br>DB02315/DB01028/DB00312/DB00214/DB05549/DB03054/DB06155/DB00988/DB09153/DB01149/DB00186/DB12422/DB00761/DB00425/DB00752/DB00143/DB01954/DB13863/DB00271/DB05057/DB11829 |
| carotid artery disease    | DB14015/DB00380/DB00574/DB01100/DB00746/DB05549/DB01233/DB13243/DB12662/DB00279/DB00934/DB13723/DB00261/DB13504/DB00845/DB00332/DB09072/DB00614/DB13863/DB05063/DB05088/DB08842/DB00207                                                                          |
| carotid artery thrombosis | DB00694/DB05549/DB01233/DB09069/DB00248/DB00261/DB00313/DB00104/DB01100/DB00434/DB14015/DB00574/DB00752/DB11387/DB01268/DB00850/DB13723/DB12693/DB00934/DB00816/DB00594/DB00279                                                                                  |
| carotid stenosis          | DB12870/DB13110/DB01233/DB00261/DB00694/DB11673/DB11829/DB01204/DB06176/DB11588/DB01113/DB00871/DB00171/DB00988/DB00780/DB02021/DB06810/DB05382/DB00176                                                                                                          |
| cerebral infarction       | DB00313/DB00816/DB01268/DB00752/DB00988/DB06212/DB00261/DB09069/DB00243/DB01171/DB00780/DB00694/DB06589/DB14015/DB00176/DB00104/DB03843/DB00285                                                                                                                  |
| cerebrovascular disease   | DB01191/DB00579/DB00261/DB01954/DB13108/DB08841/DB13243/DB00104/DB13358/DB01233/DB01244/DB01219/DB01238/DB08839/DB06690/DB00988/DB00850/DB00752/DB01074/DB01288/DB00285/DB11152/DB01268/DB02806/DB01015                                                          |
| compartment syndrome      | DB00502/DB08839/DB12881/DB00439/DB00752/DB00574/DB01140/DB09152/DB00285/DB00312/DB12693/DB00527/DB01149/DB00780/DB00143/DB00271/DB00927/DB00358                                                                                                                  |
| coronary aneurysm         | DB05223/DB00285/DB09313/DB12422/DB00988/DB00365/DB00502/DB01288/DB11152/DB00271/DB05063/DB01297/DB00816/DB01611/DB00207/DB00527/DB00358/DB00417/DB12622/DB02806/DB04557/DB01238                                                                                  |
| coronary artery disease   | DB02315/DB01288/DB00614/DB11588/DB04855/DB04557/DB00796/DB01113/DB08860/DB00468/DB00761/DB00871/DB00523/DB00332/DB00243/DB00380                                                                                                                                  |
| coronary artery vasospasm | DB00813/DB01429/DB02315/DB00761/DB01015/DB00927/DB00104/DB00816/DB09153/DB00988/DB13108/DB00796/DB00653/DB13323/DB01233/DB00171/DB12693/DB08839/DB08842/DB09069                                                                                                  |
| coronary restenosis       | DB04855/DB00752/DB00312/DB00176/DB06212/DB00910/DB00261/DB08841/DB00680/DB09313/DB00780/DB00988/DB00431/DB12422/DB00802/DB00415                                                                                                                                  |
| coronary stenosis         | DB00332/DB00794/DB05549/DB01182/DB09072/DB02315/DB11326/DB00176/DB01113/DB14015/DB08842/DB00813/DB012                                                                                                                                                            |

| Disease                        | Potential therapeutic drug (DrugBank ID)                                                                                                                                                                                              |
|--------------------------------|---------------------------------------------------------------------------------------------------------------------------------------------------------------------------------------------------------------------------------------|
| coronary thrombosis            | 88/DB01142/DB00934/DB00346/DB00574/DB01954/DB00285/DB11387/DB01143<br>DB09313/DB00694/DB00261/DB02806/DB14015/DB01143/DB01954/DB00285/DB00574/DB08839/DB00152/DB00104/DB03843/DB00284/DB00365/DB00752/DB00434/DB01171/DB09069/DB04557 |
| diabetic angiopathy            | DB12881/DB00910/DB11829/DB11588/DB12422/DB00243/DB04557/DB00358/DB01288/DB00529/DB00521/DB00261/DB01182/DB09212/DB00813/DB06176/DB01174/DB01189                                                                                       |
| diabetic retinopathy           | DB01191/DB02021/DB00988/DB00574/DB00143/DB08839/DB09212/DB00248/DB00687/DB01235/DB00204/DB13323/DB01140/DB00434                                                                                                                       |
| erythromelalgia                | DB01219/DB00248/DB01182/DB04953/DB00434/DB01426/DB00332/DB00104/DB00796/DB00261/DB12693/DB00816/DB11742/DB00850/DB00897/DB01244/DB00285/DB09086/DB01429/DB01233/DB01100/DB11673                                                       |
| essential hypertension         | DB00312/DB00104/DB00813/DB04855/DB00521/DB09152/DB00417/DB00171/DB01113/DB00242/DB00674/DB00271/DB09153/DB03843/DB00679/DB00468/DB00598/DB00829/DB00883/DB00572/DB00501                                                               |
| Fabry disease                  | DB08839/DB00943/DB01429/DB00500/DB01195/DB13110/DB01035/DB11136/DB11152/DB00276/DB00802/DB08809/DB00284/DB00332/DB05382/DB00297/DB00244                                                                                               |
| Henoch-Schoenlein purpura      | DB00833/DB01219/DB00313/DB00567/DB01140/DB00910/DB00738/DB00243/DB11387/DB00574/DB09477/DB00261/DB00285/DB00543/DB00988/DB00529/DB00796/DB01015/DB01611/DB01238                                                                       |
| hepatic vein thrombosis        | DB00694/DB00313/DB00380/DB11447/DB01268/DB12422/DB01233/DB00527/DB00485/DB12881/DB06176/DB13243/DB00794/DB09313/DB14574/DB06155/DB06810/DB00614/DB00943/DB11387/DB14015/DB01182/DB05063                                               |
| hereditary angioedema          | DB05549/DB00527/DB00752/DB00439/DB09069/DB00594/DB05223/DB00521/DB13682/DB05015/DB00176/DB01400/DB00243/DB13723/DB01100                                                                                                               |
| intermediate coronary syndrome | DB12881/DB00332/DB01244/DB01219/DB00285/DB13358/DB00358/DB00681/DB00313/DB00271/DB01370/DB00523/DB00152/DB01268/DB01140/DB04557/DB08842/                                                                                              |
| intracranial aneurysm          | DB00816/DB00988/DB01219/DB05549/DB05383/DB00527/DB00752/DB04953/DB00261/DB06155/DB00796/DB00285/DB11387/DB01413/DB03843/DB13732/DB00439/DB00543/DB12693/DB06176/DB04557                                                               |
| intracranial thrombosis        | DB09313/DB00502/DB00261/DB00271/DB00527/DB05549/DB13110/DB00988/DB00816/DB03843/DB00752/DB05223/DB118                                                                                                                                 |



| Disease                         | Potential therapeutic drug (DrugBank ID)                                                                                                                                                                                              |
|---------------------------------|---------------------------------------------------------------------------------------------------------------------------------------------------------------------------------------------------------------------------------------|
| Kawasaki disease                | 29/DB00802/DB01611/DB09072/DB08809/DB00279/DB00738/DB06176/DB09069<br>DB01238/DB09313/DB01184/DB00485/DB00910/DB00358/DB00261/DB05015/DB00816/DB01233/DB00271/DB00365/DB00285/DB00523/DB01143/DB12622/DB05382/DB01288/DB06460/DB06558 |
| malignant hypertension          | DB09477/DB00214/DB01015/DB06589/DB09153/DB00653/DB00761/DB01189/DB01408/DB00313/DB00411/DB01297/DB08839/DB00813/DB00656/DB00431/DB13781/DB00107/DB13732/DB00694/DB01204/DB02315/DB01219                                               |
| multiple myeloma                | DB00694/DB11447/DB03843/DB09371/DB11616/DB00819/DB15584/DB00523/DB00276/DB00261/DB01268/DB00313/DB05015/DB06176/DB06810/DB05223/DB00614/DB04855/DB00738/DB13323/DB09313/DB00681/DB12422/DB09086                                       |
| multiple system atrophy         | DB00313/DB01357/DB09371/DB13919/DB00717/DB01050/DB11846/DB00695/DB00390/DB00328/DB03054/DB01240/DB09153/DB00802/DB01429/DB00276/DB01164/DB00393/DB00297/DB11387/DB06690/DB11447                                                       |
| myocardial infarction           | DB01182/DB09477/DB00521/DB00694/DB00796/DB01288/DB12752/DB09153/DB00332/DB09069/DB02315/DB05057/DB12422/DB00313/DB01113/DB08841/DB00431/DB05549/DB01149/DB01233                                                                       |
| peripheral vascular disease     | DB00574/DB00694/DB00656/DB12693/DB00243/DB05549/DB01426/DB00434/DB09069/DB12752/DB00521/DB00557/DB00380/DB00897/DB00313/DB08839/DB00910/DB01233/DB01288/DB01171/DB01268/DB08826/DB00279/DB00207/DB14015/DB02315                       |
| pseudoxanthoma elasticum        | DB09086/DB09371/DB00143/DB00284/DB04557/DB00988/DB01400/DB00313/DB00431/DB11152/DB05549/DB00279/DB03054/DB04861/DB05382                                                                                                               |
| pulmonary embolism              | DB00502/DB00694/DB00313/DB05549/DB12693/DB00543/DB00527/DB13323/DB00176/DB02806/DB06148/DB00988/DB06176/DB00780/DB14574/DB08839/DB00285/DB09313/DB00518                                                                               |
| pulmonary venoocclusive disease | DB11387/DB01174/DB00313/DB00500/DB00698/DB03054/DB01182/DB00794/DB11588/DB00279/DB13323/DB00523/DB04557/DB01370/DB00776/DB00795                                                                                                       |
| renal hypertension              | DB00214/DB00796/DB01297/DB01189/DB09477/DB01219/DB00833/DB09153/DB00813/DB00104/DB04335/DB01204/DB01268/DB11616/DB00313/DB08826/DB00529/DB01159/DB00910                                                                               |
| renovascular hypertension       | DB00313/DB09477/DB00796/DB00910/DB00485/DB01189/DB12870/DB00653/DB01268/DB04855/DB00574/DB00254/DB01233/DB00567/DB08826/DB09153                                                                                                       |
| retinal vein occlusion          | DB01357/DB00261/DB00816/DB00285/DB13504/DB01288/DB                                                                                                                                                                                    |

| Disease                     | Potential therapeutic drug (DrugBank ID)                                                                                                                                                                                           |
|-----------------------------|------------------------------------------------------------------------------------------------------------------------------------------------------------------------------------------------------------------------------------|
| transient cerebral ischemia | 00614/DB00313/DB00850/DB01233/DB12881/DB00104/DB09313/DB00279/DB05549/DB01954/DB00284/DB00434/<br>DB00176/DB01182/DB05549/DB02315/DB01297/DB00934/DB13863/DB08839/DB01288/DB01189/DB05382/DB09153/DB00816/DB13243/DB00285/DB12422/ |
| vasculitis                  | DB01140/DB00816/DB00261/DB05015/DB00681/DB01015/DB01288/DB01053/DB01268/DB13323/DB03843/DB05223/DB01370/DB06810/DB00279/DB13732/DB01219/DB00752/DB02806/DB00567                                                                    |
| Wegener's granulomatosis    | DB01204/DB00313/DB13323/DB01268/DB01174/DB01238/DB00681/DB00276/DB05015/DB00261/DB06690/DB09153/DB00431/DB09371/DB00780/DB01611/DB01140/DB05382/DB00890                                                                            |

**Table S7.** Major enrichment situations of genetic subgroups for potential therapeutic drug targets in NSCLC

| Group                                                     | Information | Information content                                                                                                                                                                                                                                   |
|-----------------------------------------------------------|-------------|-------------------------------------------------------------------------------------------------------------------------------------------------------------------------------------------------------------------------------------------------------|
| I                                                         | Target      | ESR1/TNF/TOP2A/DNMT1/AHR                                                                                                                                                                                                                              |
| The same                                                  | Drug        | DB00947/DB06444/DB01177/DB01179/DB01099/DB00338                                                                                                                                                                                                       |
| pathogenic                                                | GO          | cAMP-mediated signaling/immune response                                                                                                                                                                                                               |
| and                                                       | KEGG        | Chemical carcinogenesis - reactive oxygen species/Chemical carcinogenesis - receptor activation/Th17 cell differentiation                                                                                                                             |
| therapeutic mechanisms.                                   |             |                                                                                                                                                                                                                                                       |
| II                                                        | Target      | TUBB/FGFR2/HDAC1/HDAC2/HDAC6/APP/MAPT                                                                                                                                                                                                                 |
| Same                                                      | Drug        | DB01179/DB01394/DB08901/DB06176/DB05088/DB00448                                                                                                                                                                                                       |
| therapeutic                                               | GO          | epidermis development/epithelial cell apoptotic process/epithelial cell migration/epithelial cell proliferation/epithelial to mesenchymal transition/chromatin remodeling/Cellular response to internal and external stimuli/regulation of cell cycle |
| function as known drugs.                                  | KEGG        | Cell cycle/MAPK signaling pathway/MicroRNAs in cancer/Viral carcinogenesis/Ras signaling pathway/Rap1 signaling pathway                                                                                                                               |
| III                                                       | Target      | KDR/KIT/SRC/EPHA2/PDGFRα/TGFB1/HSP90AA1/FGFR4/CSK/FRK                                                                                                                                                                                                 |
| Potential to                                              | Drug        | DB01254/DB08901/DB02424/DB01162                                                                                                                                                                                                                       |
| the function of                                           | GO          | cellular response to oxidative stress/cellular response to vascular endothelial growth factor stimulus/cellular response to vascular endothelial growth factor stimulus/epithelial cell proliferation/epithelium migration/ERK1 and ERK2 cascade      |
| drugs that act on the causative mechanism of the disease. | KEGG        | EGFR tyrosine kinase inhibitor resistance/MAPK signaling pathway/PI3K-Akt signaling pathway/Ras signaling pathway/Th17 cell differentiation                                                                                                           |

|                                                                   |        |                                                                                                                                                                                                                                                                                                |
|-------------------------------------------------------------------|--------|------------------------------------------------------------------------------------------------------------------------------------------------------------------------------------------------------------------------------------------------------------------------------------------------|
| IV<br>Unique<br>functions of<br>potential<br>therapeutic<br>drugs | Target | ABL1/KCNH2/FLT3/PDGFRB/ATP4A/PPAT/ABL2/KCNH6/ADRA1A/ADRA1B/KCNH7/ADRA1D/ABCC1/FYN/YES1/LCK/STAT5B/AURKA/MAPK14/HSP90B1/BTK/TU<br>BA4A/HSP90AB1/FGFR1/FGFR3/RET/EPHB4/TEK/HDAC4/HSPA8/LYN/BCR/FGR/EPHA5/ZAK/NR4A3                                                                               |
|                                                                   | Drug   | DB01254/DB08901/DB01162/DB00338/DB00448/DB00590/<br>DB06176/DB05220/DB02424/DB01179                                                                                                                                                                                                            |
|                                                                   | GO     | branching morphogenesis of an epithelial tube/cell-substrate adhesion/immune response-activating cell surface receptor signaling pathway/immune response-activating signal transduction/immune response-regulating cell surface receptor signaling pathway/negative regulation of MAPK cascade |
|                                                                   | KEGG   | Th17 cell differentiation/Ras signaling pathway/PI3K-Akt signaling pathway/NF-kappa B signaling pathway/MAPK signaling pathway/EGFR tyrosine kinase inhibitor resistance/Chemical carcinogenesis - receptor activation/Cell cycle                                                              |

---
