# Supplementary figures and images for: DDCM: A Computational Strategy for Drug Repositioning Based on Support-Vector Regression Algorithm (part 1 of 2)
Source: MDPI journal article supplement (doi:10.3390/ijms25105267), 2024-05-12

## lung benign neoplasm\_stability analysis

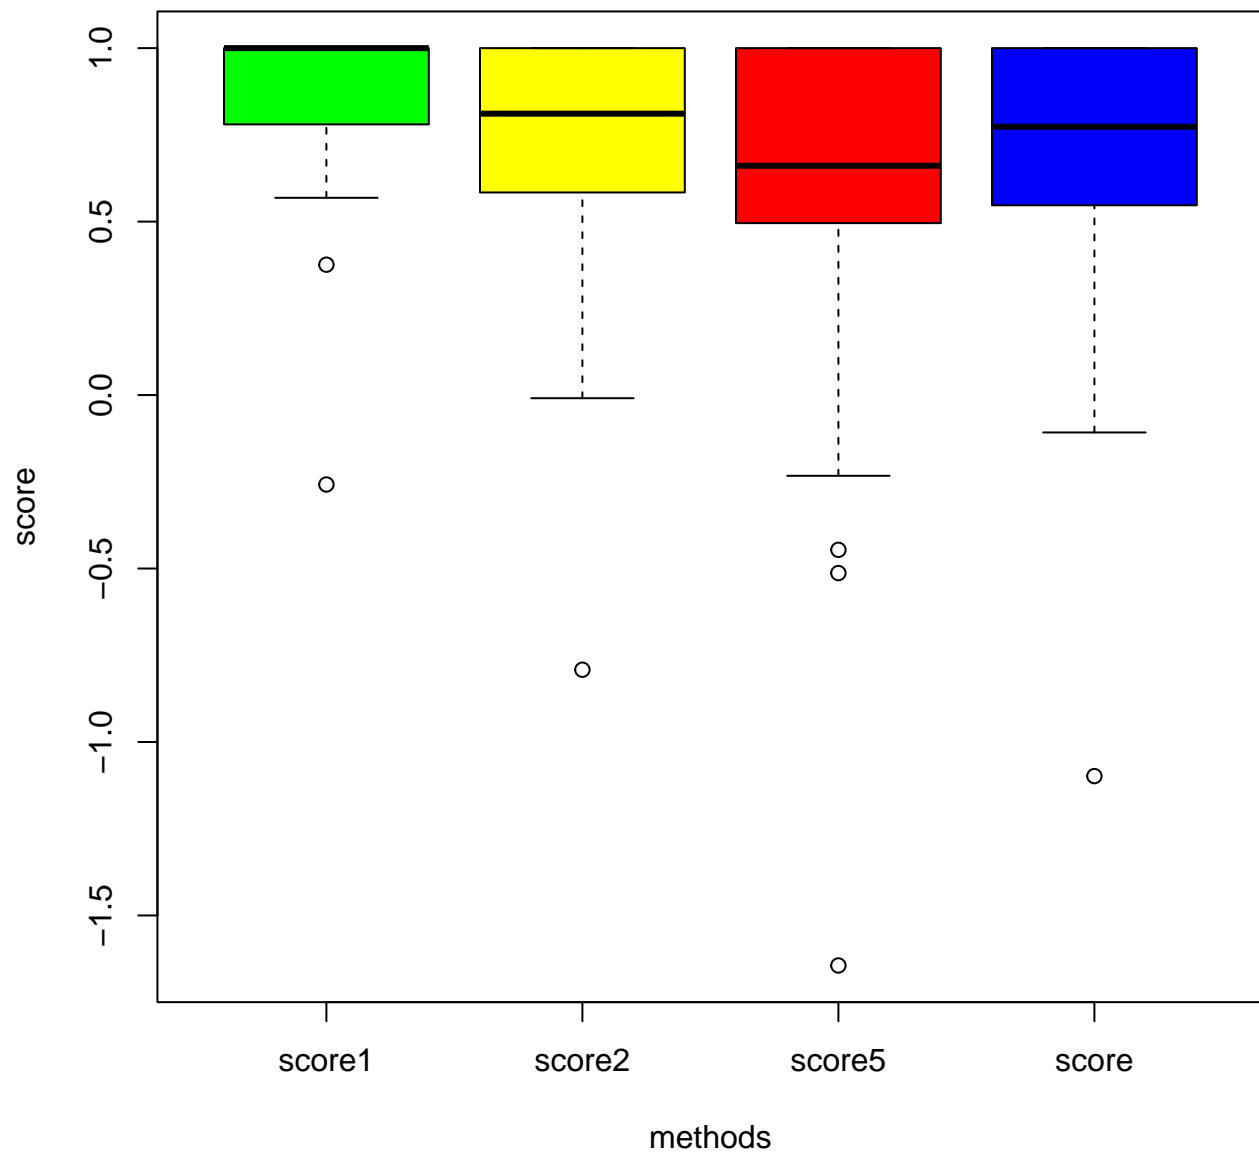

Supplement: s1 [file s1]

# pleural cancer\_stability analysis

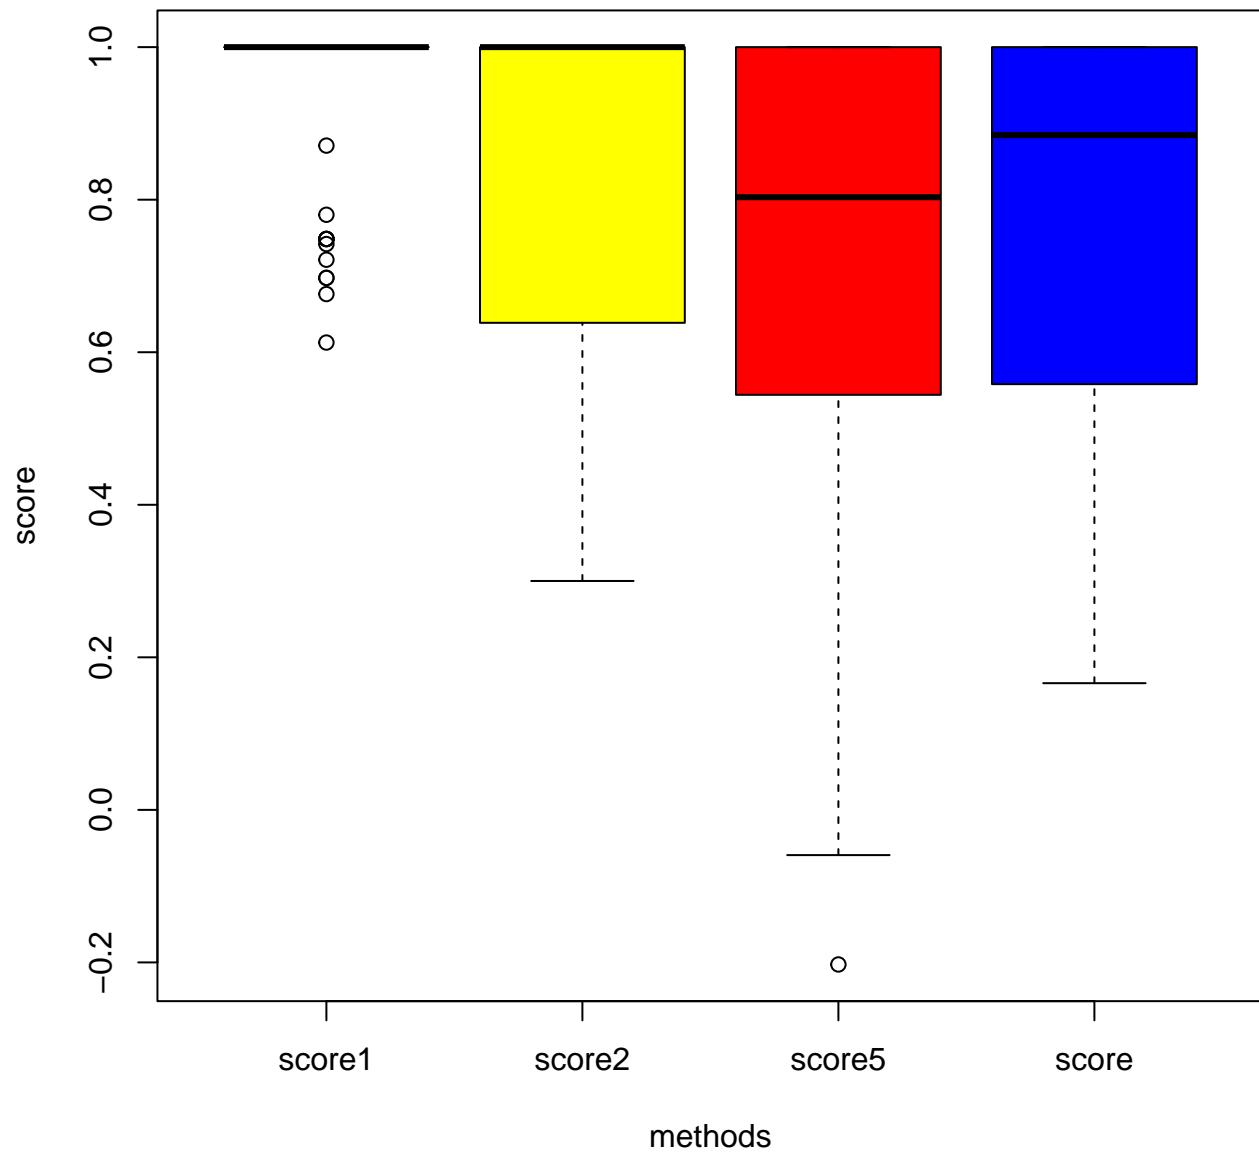

Supplement: s1 [file s1]

# pulmonary embolism\_stability analysis

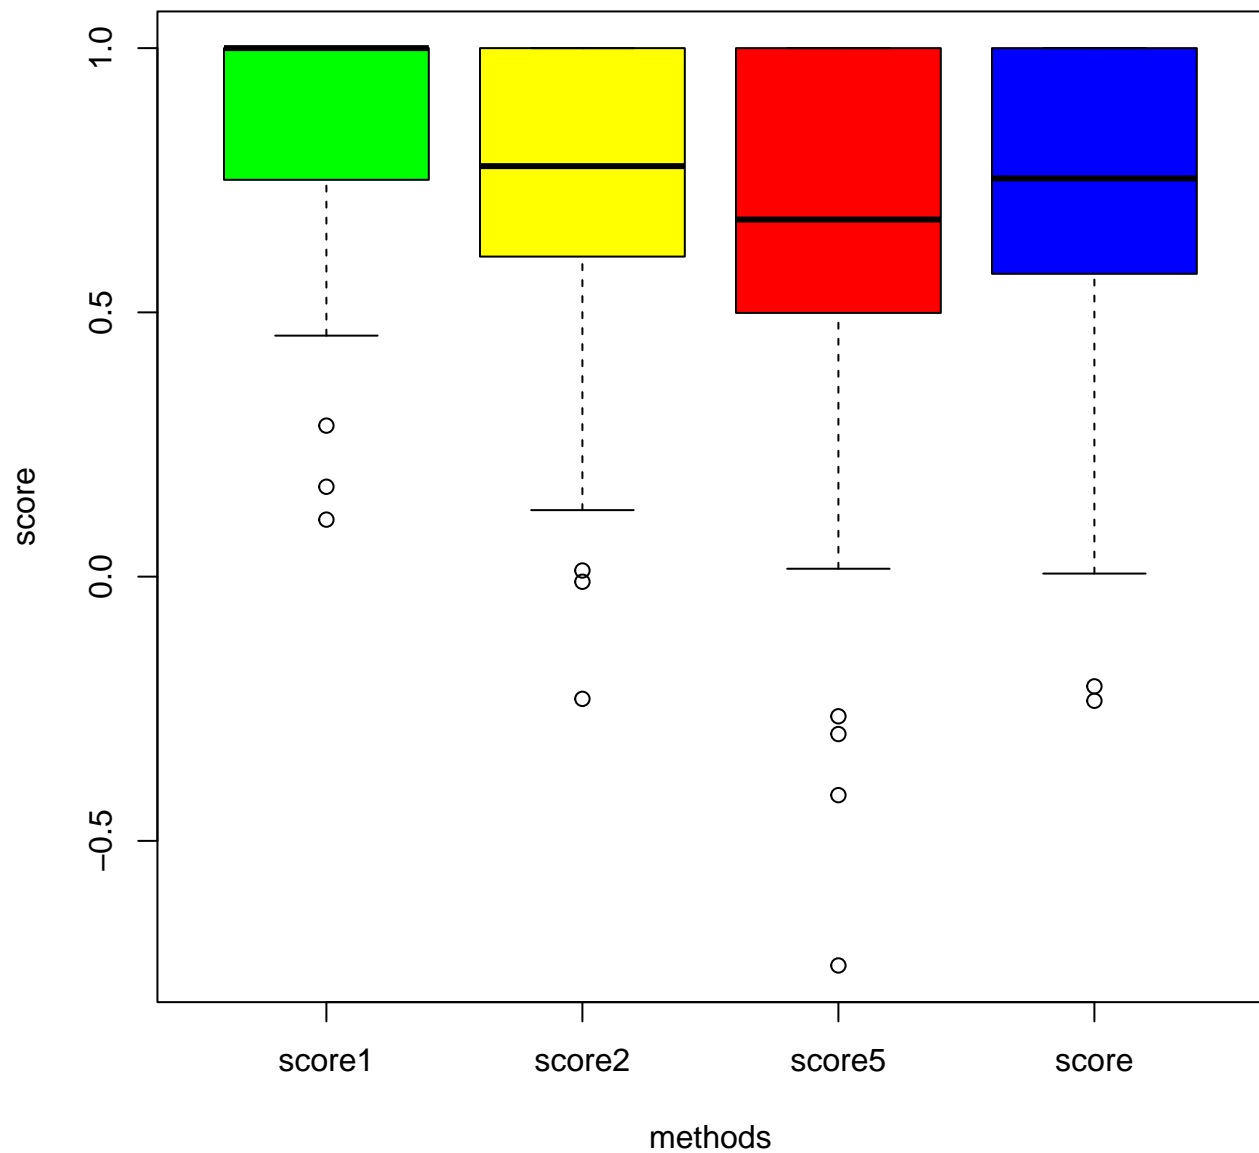

Supplement: s1 [file s1]

## Fabry disease\_stability analysis

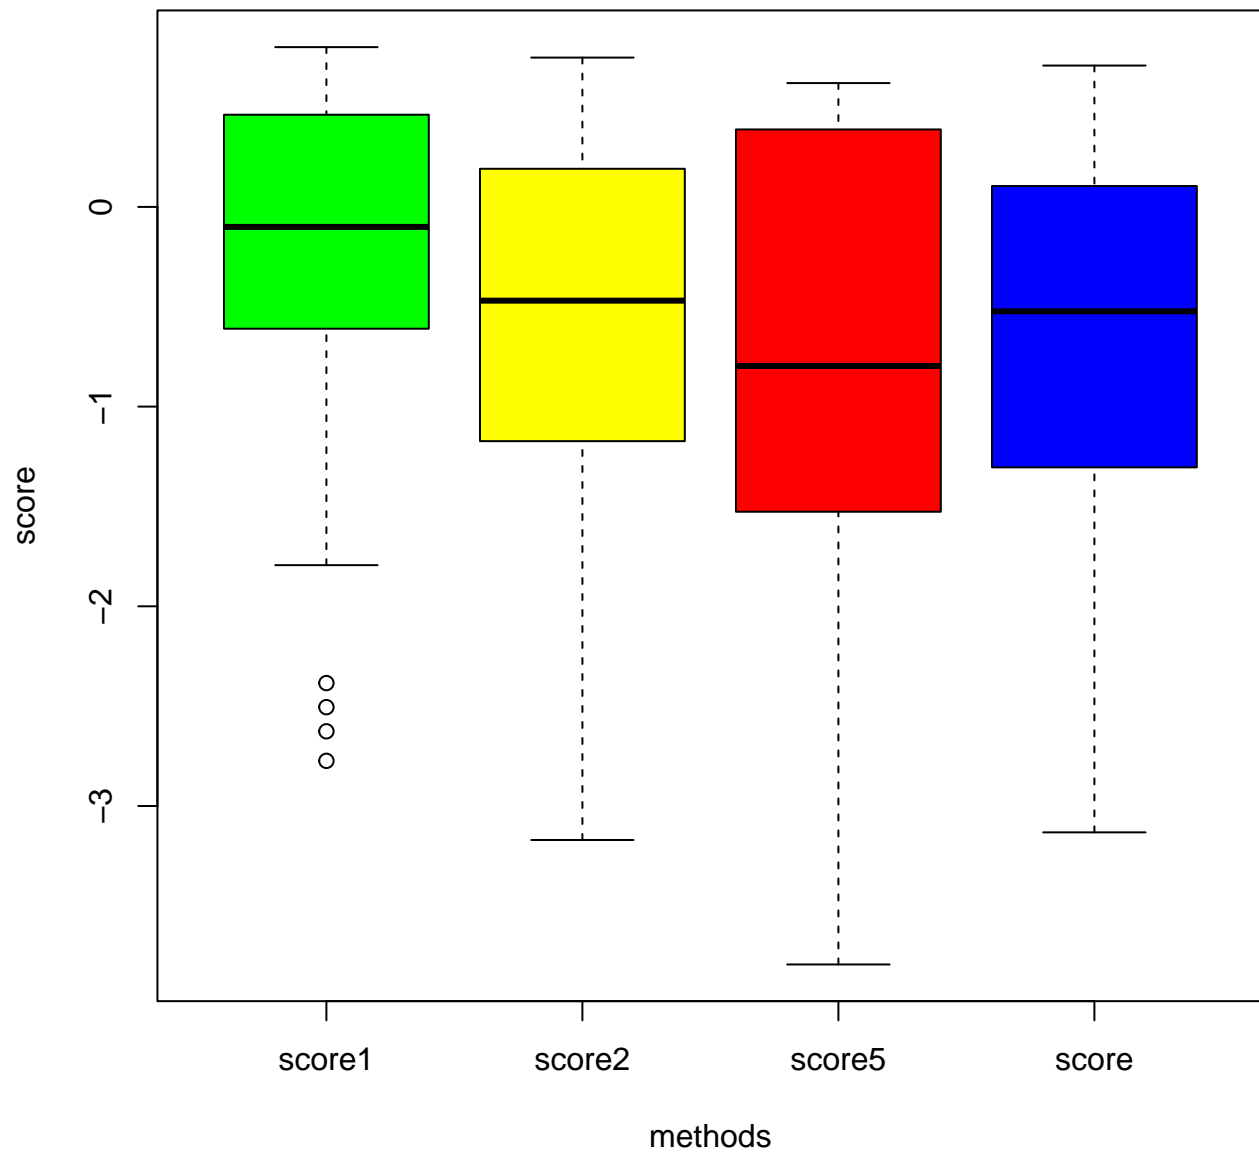

Supplement: s1 [file s1]

# nephroblastoma\_stability analysis

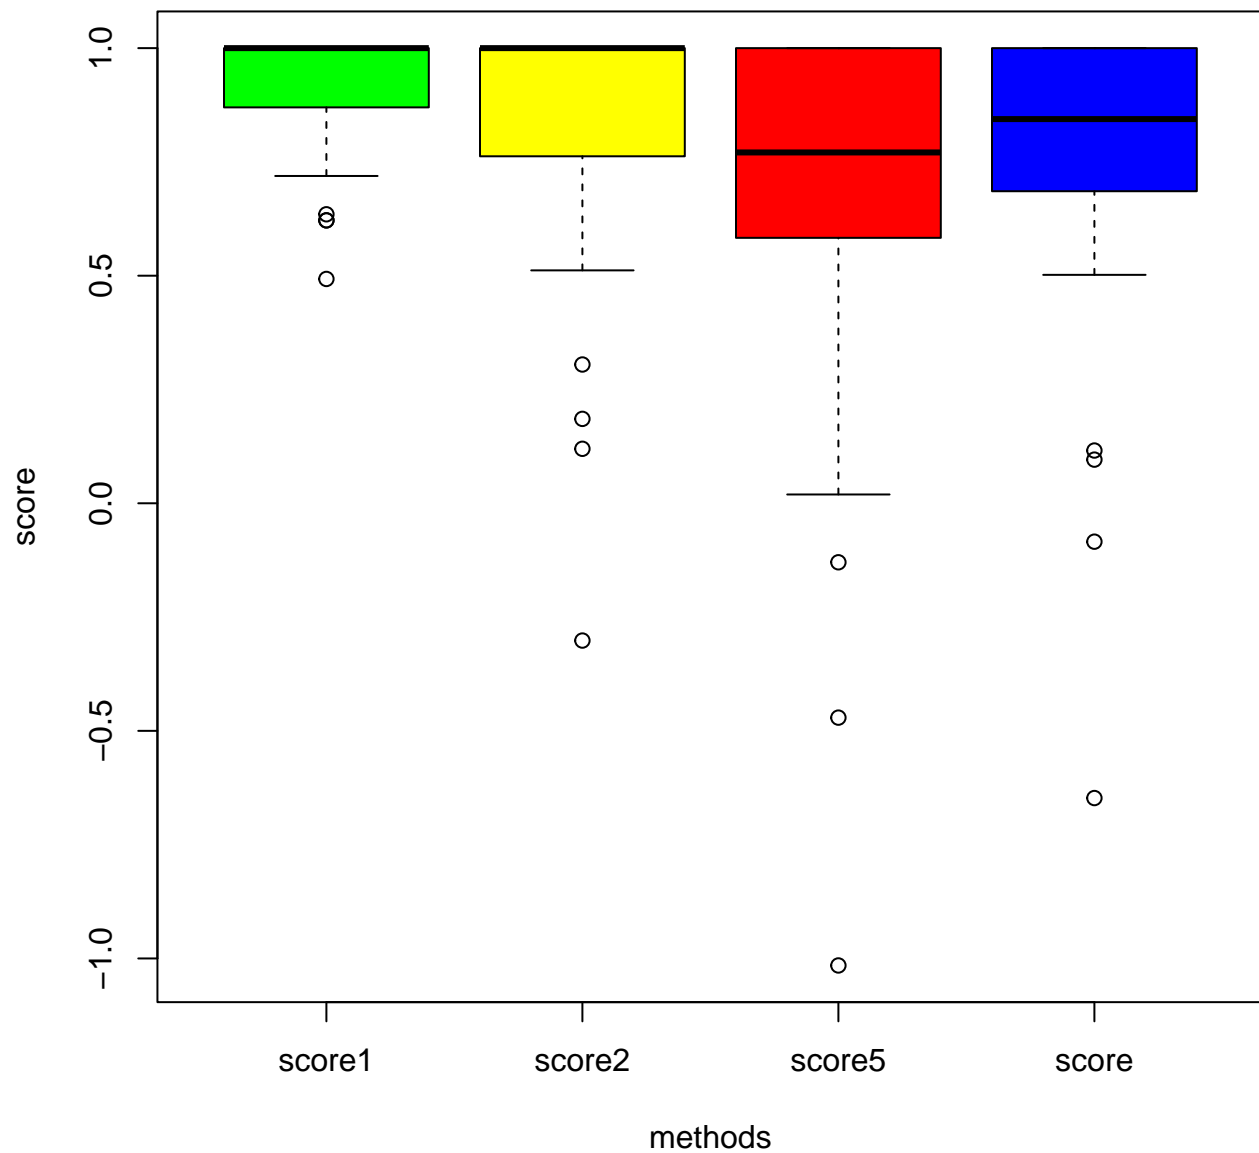

Supplement: s1 [file s1]

# skin melanoma\_stability analysis

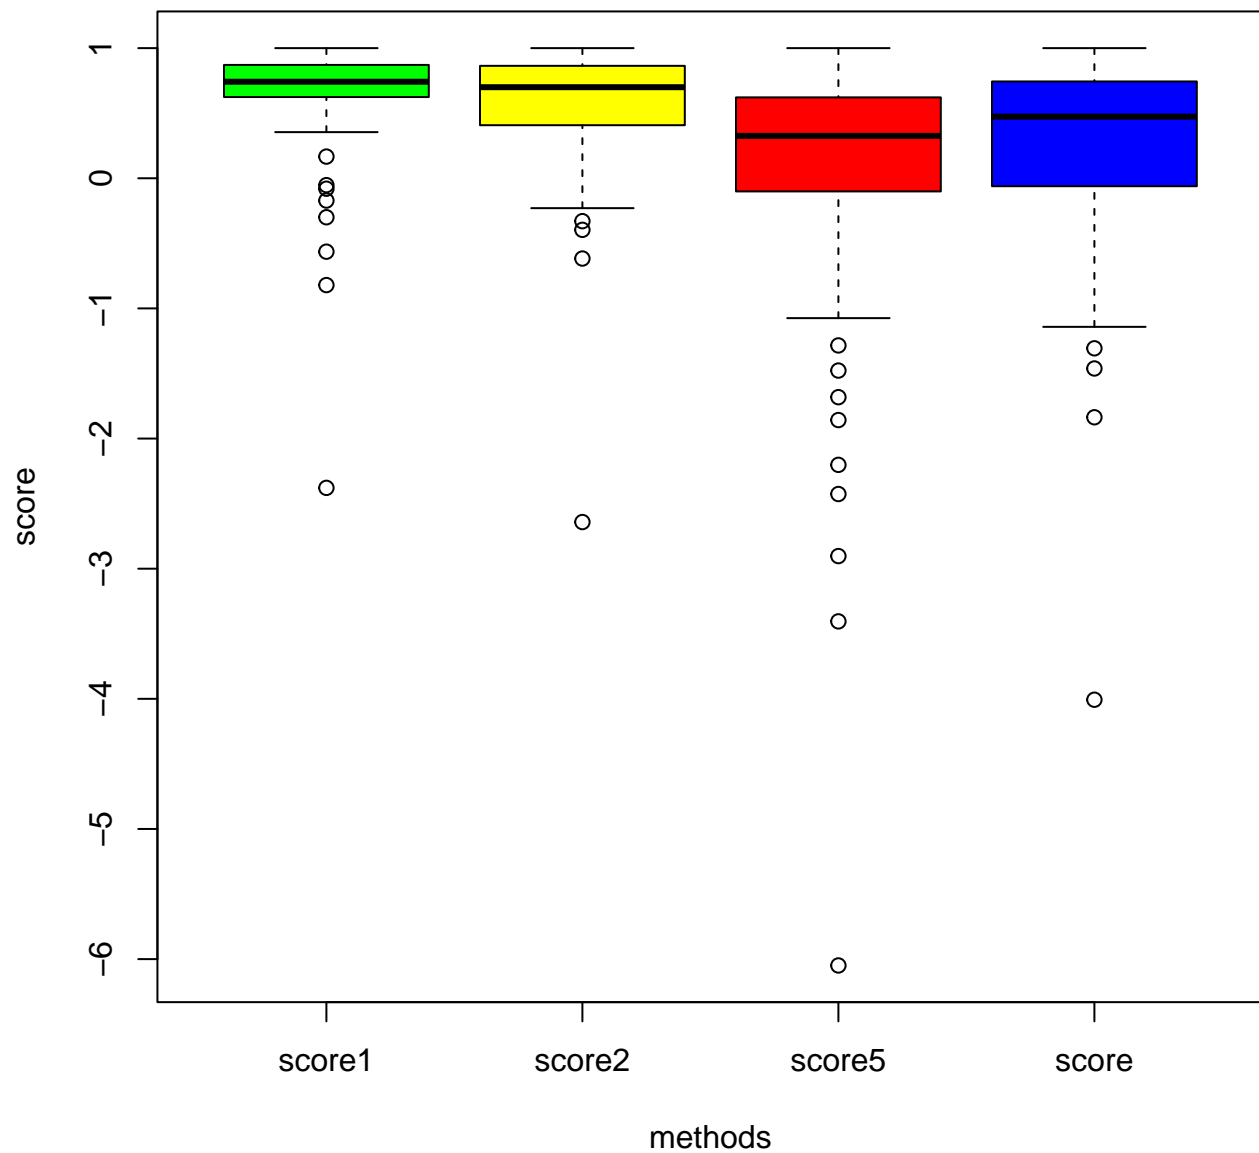

Supplement: s1 [file s1]

# diabetic retinopathy\_stability analysis

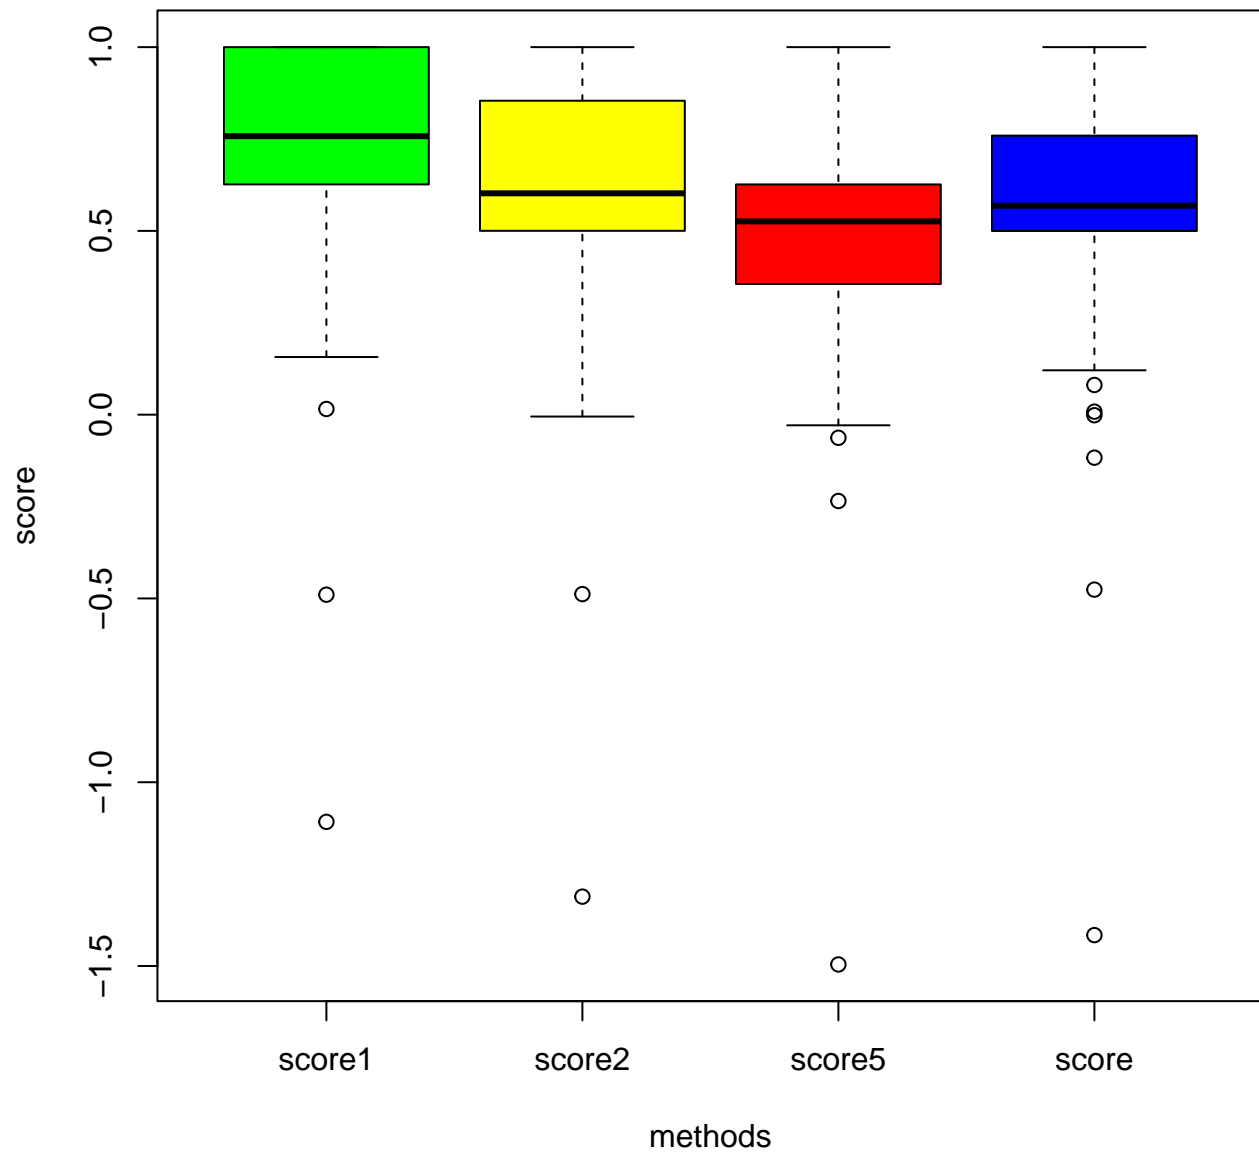

Supplement: s1 [file s1]

# bone cancer\_stability analysis

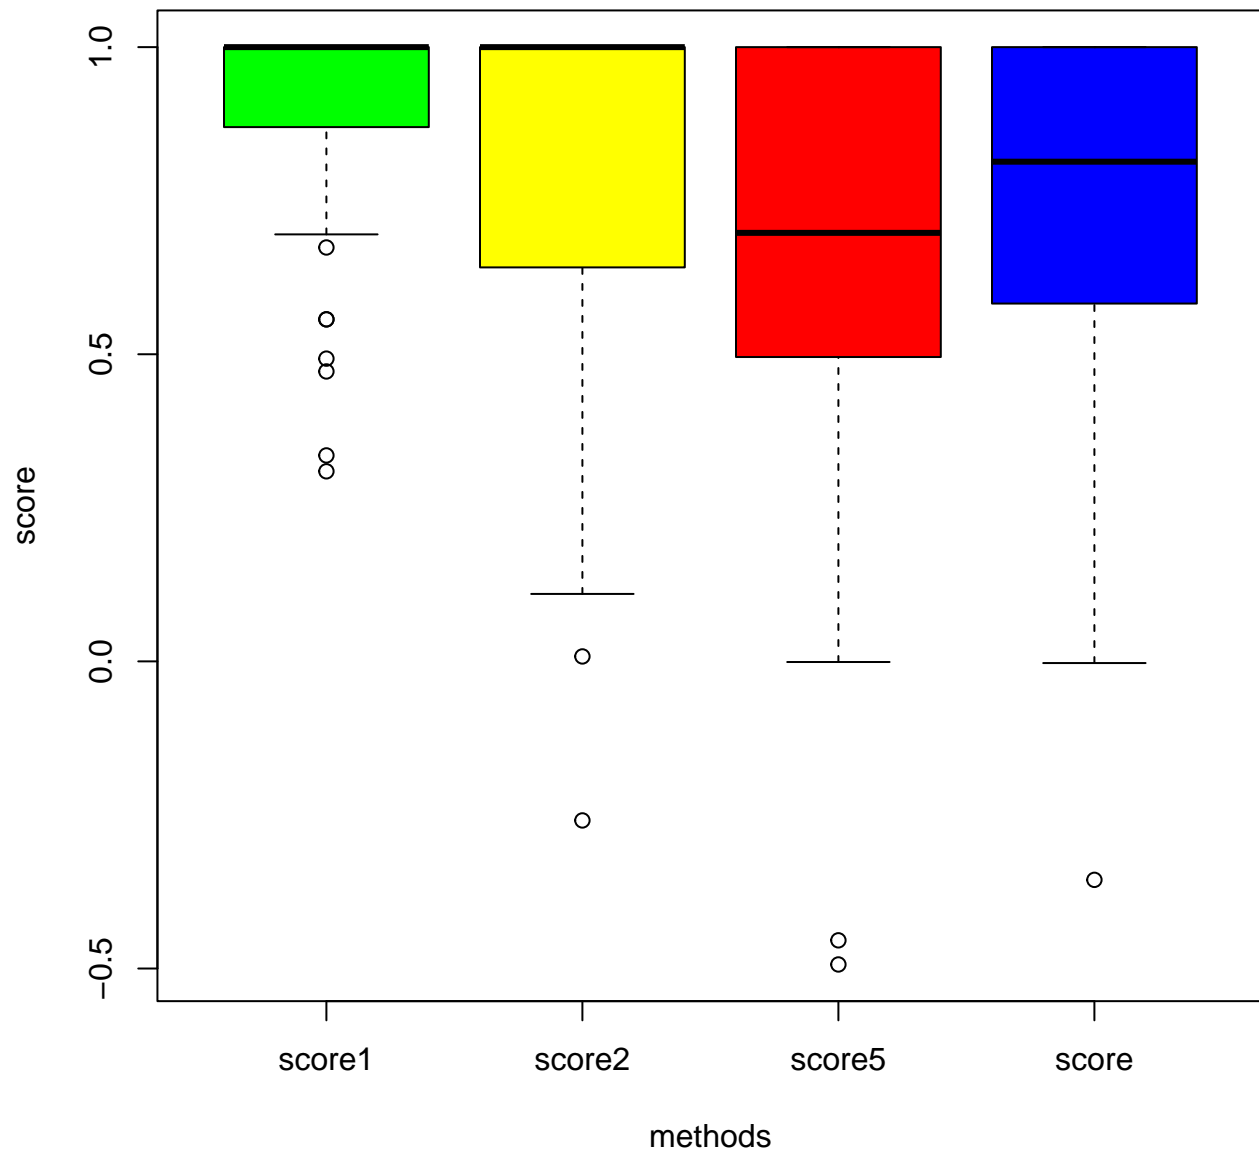

Supplement: s1 [file s1]

# thyroid cancer\_stability analysis

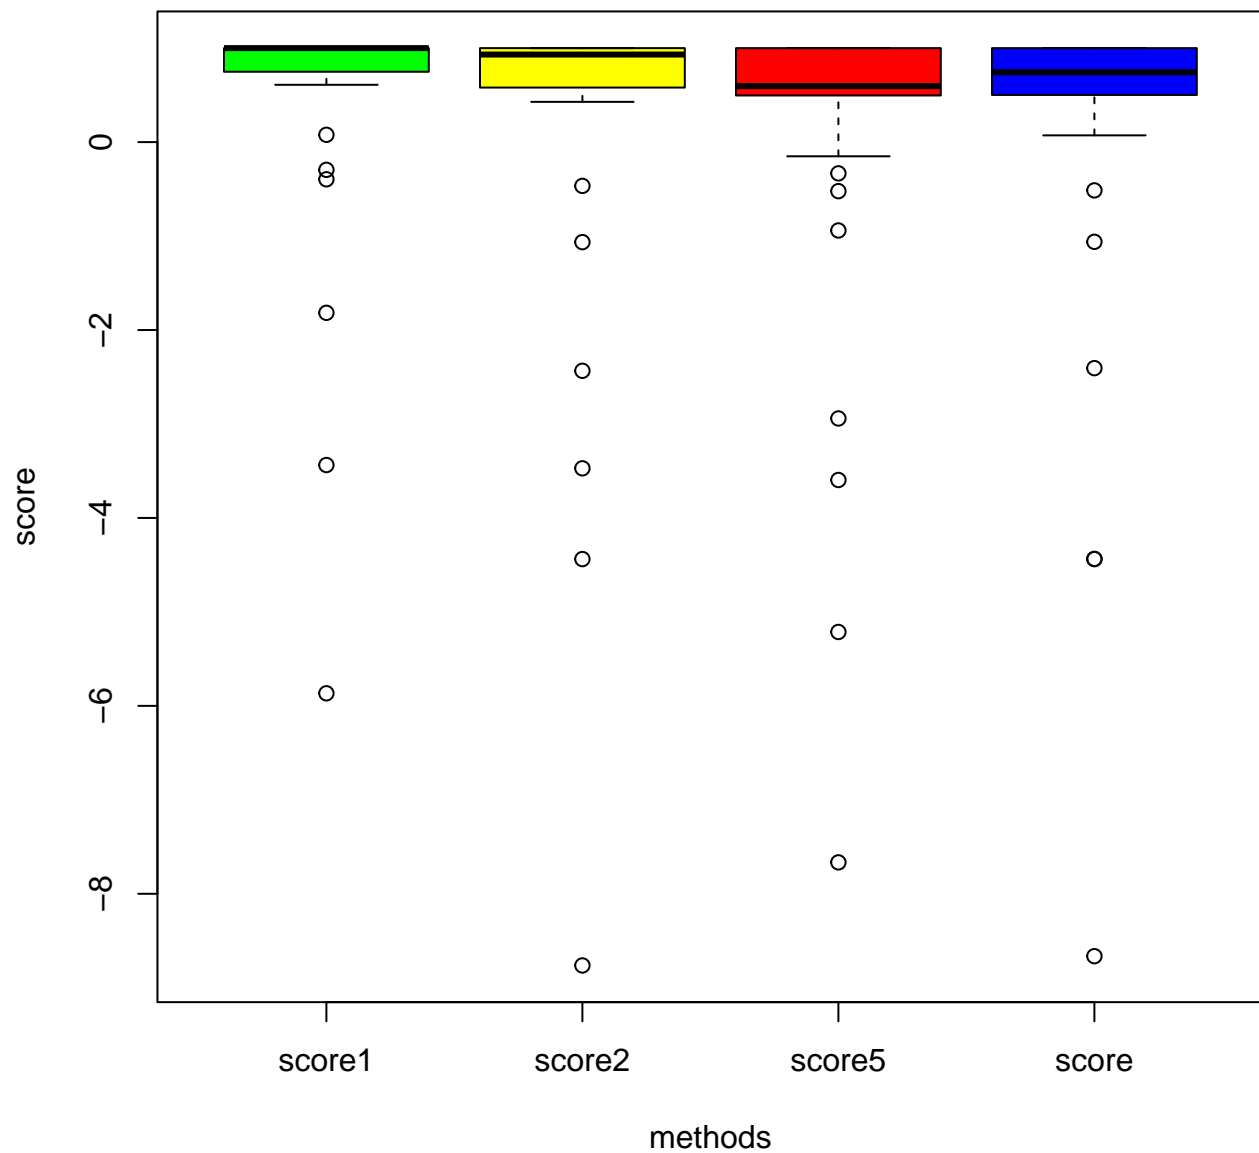

Supplement: s1 [file s1]

# penile cancer\_stability analysis

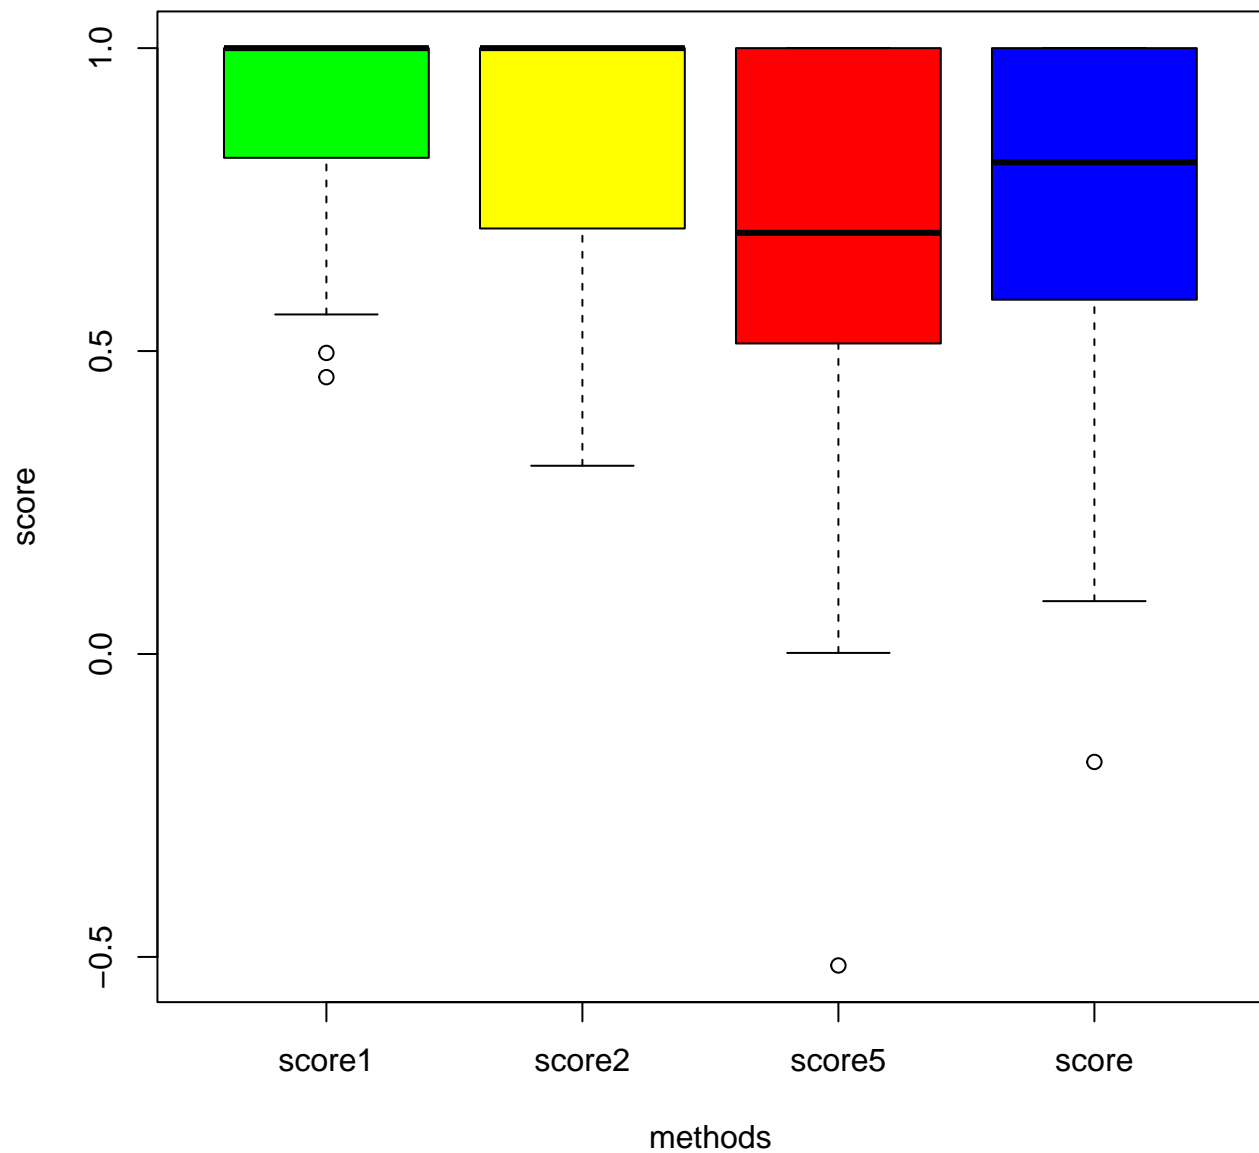

Supplement: s1 [file s1]

# rectal neoplasm\_stability analysis

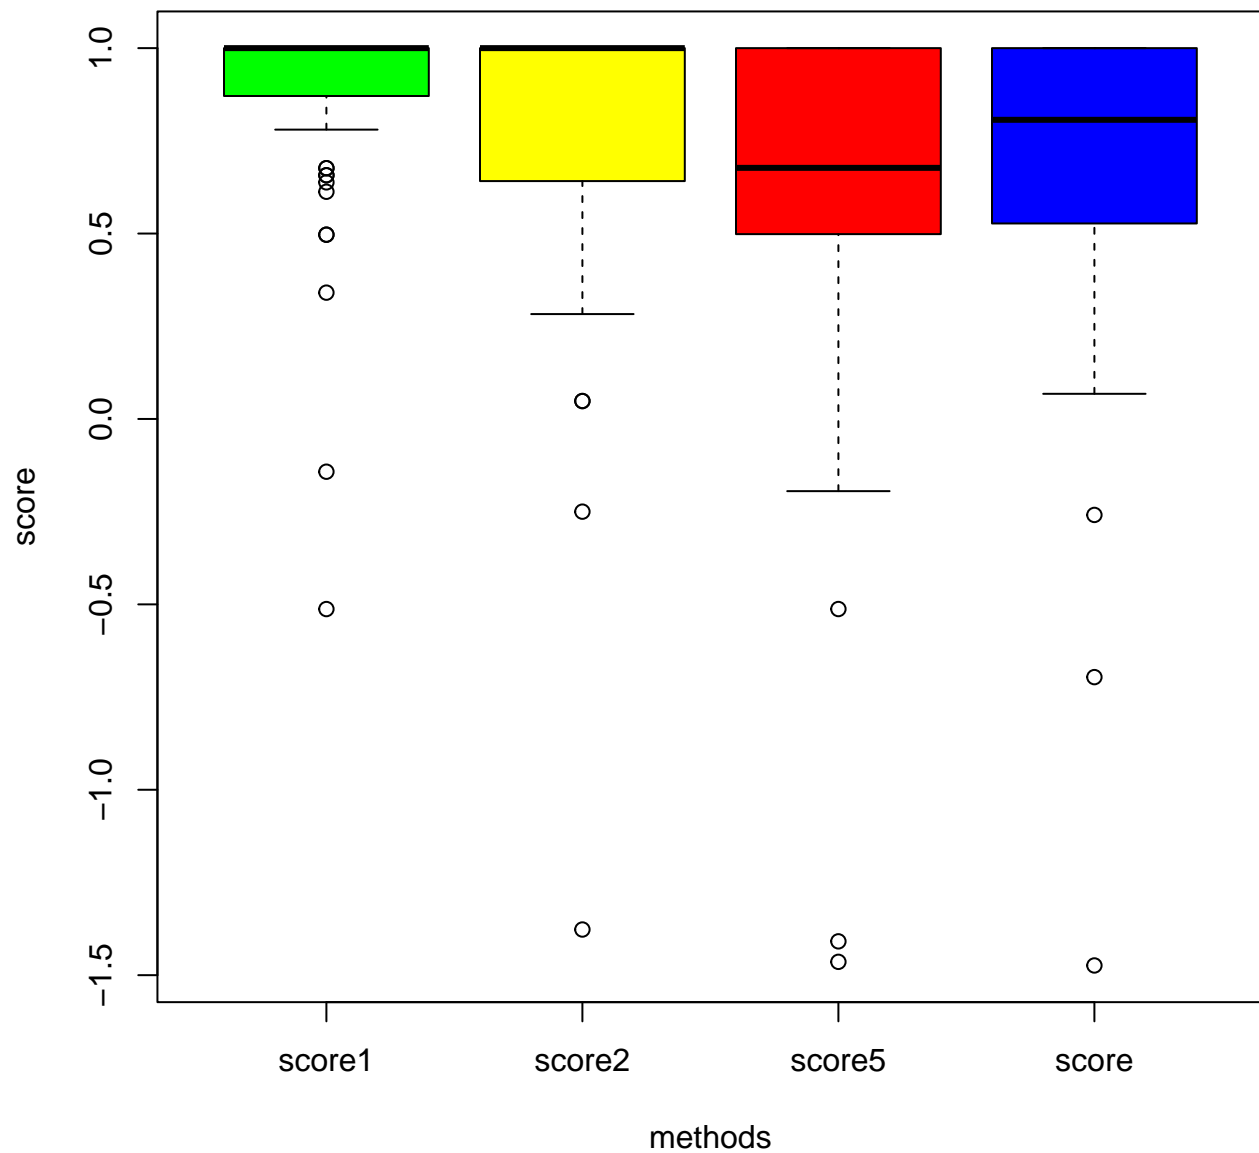

Supplement: s1 [file s1]

# hepatic vein thrombosis\_stability analysis

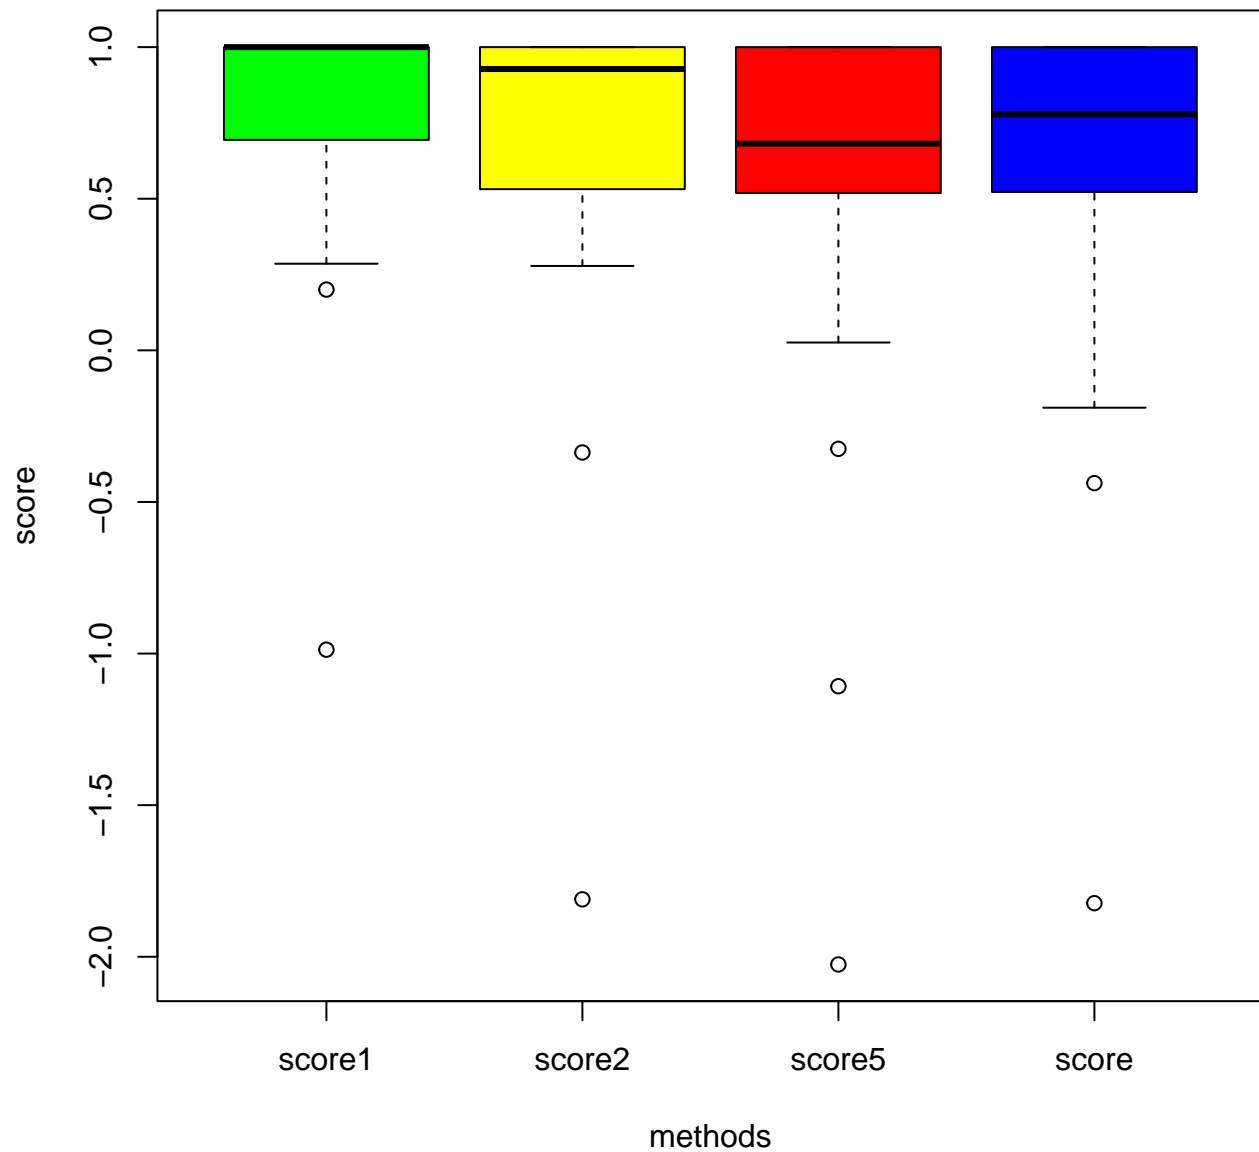

Supplement: s1 [file s1]

# coronary restenosis\_stability analysis

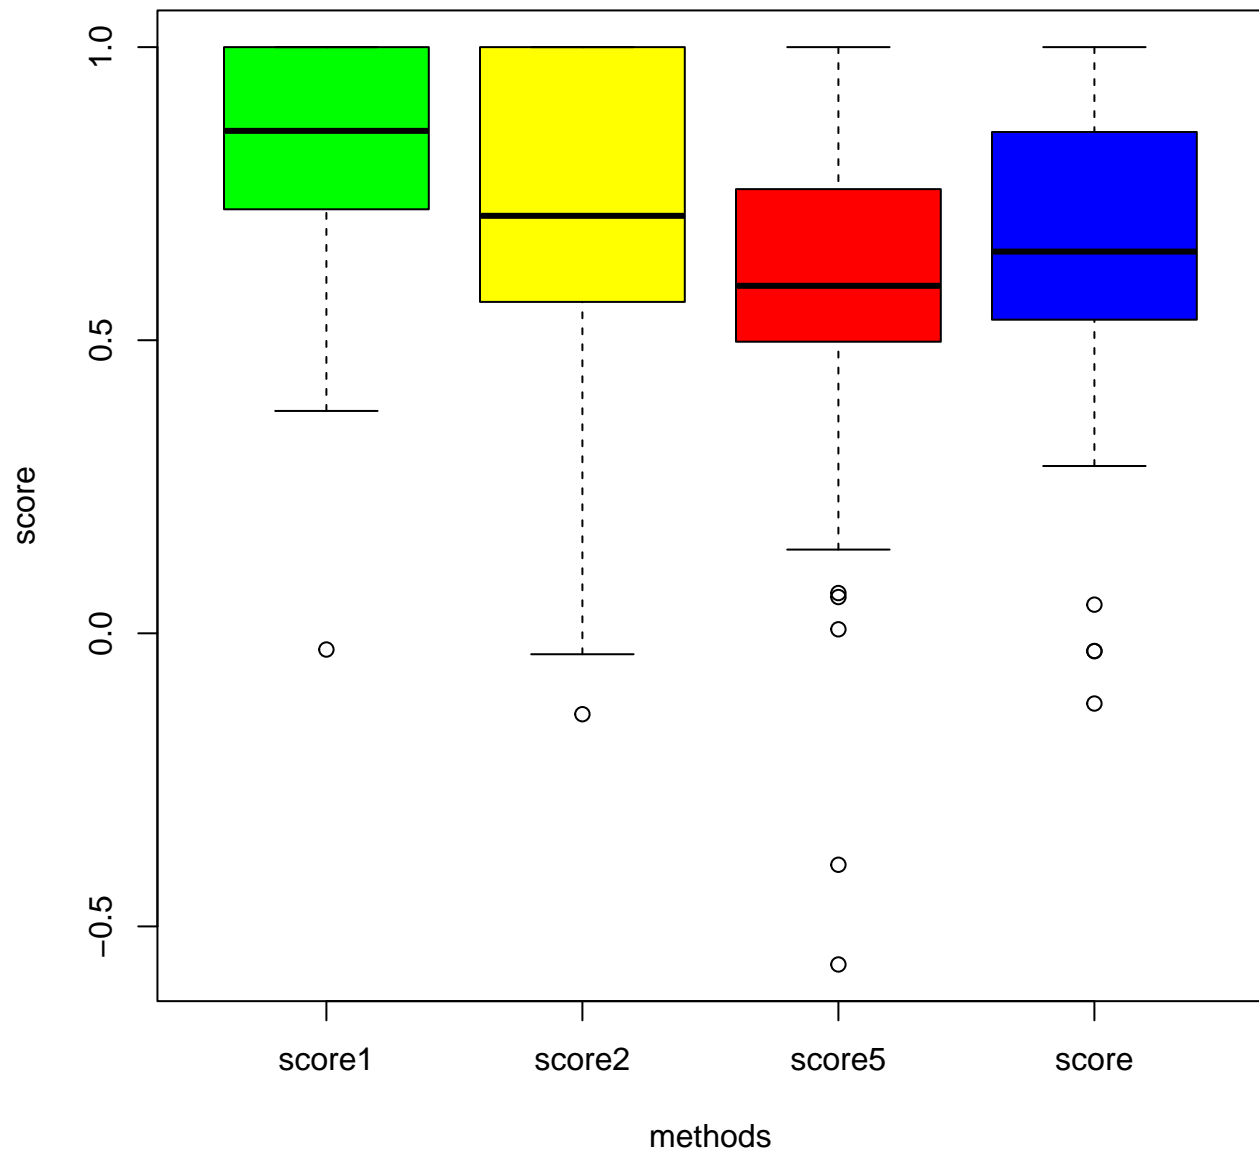

Supplement: s1 [file s1]

# anterior ischemic optic neuropathy\_stability analysis

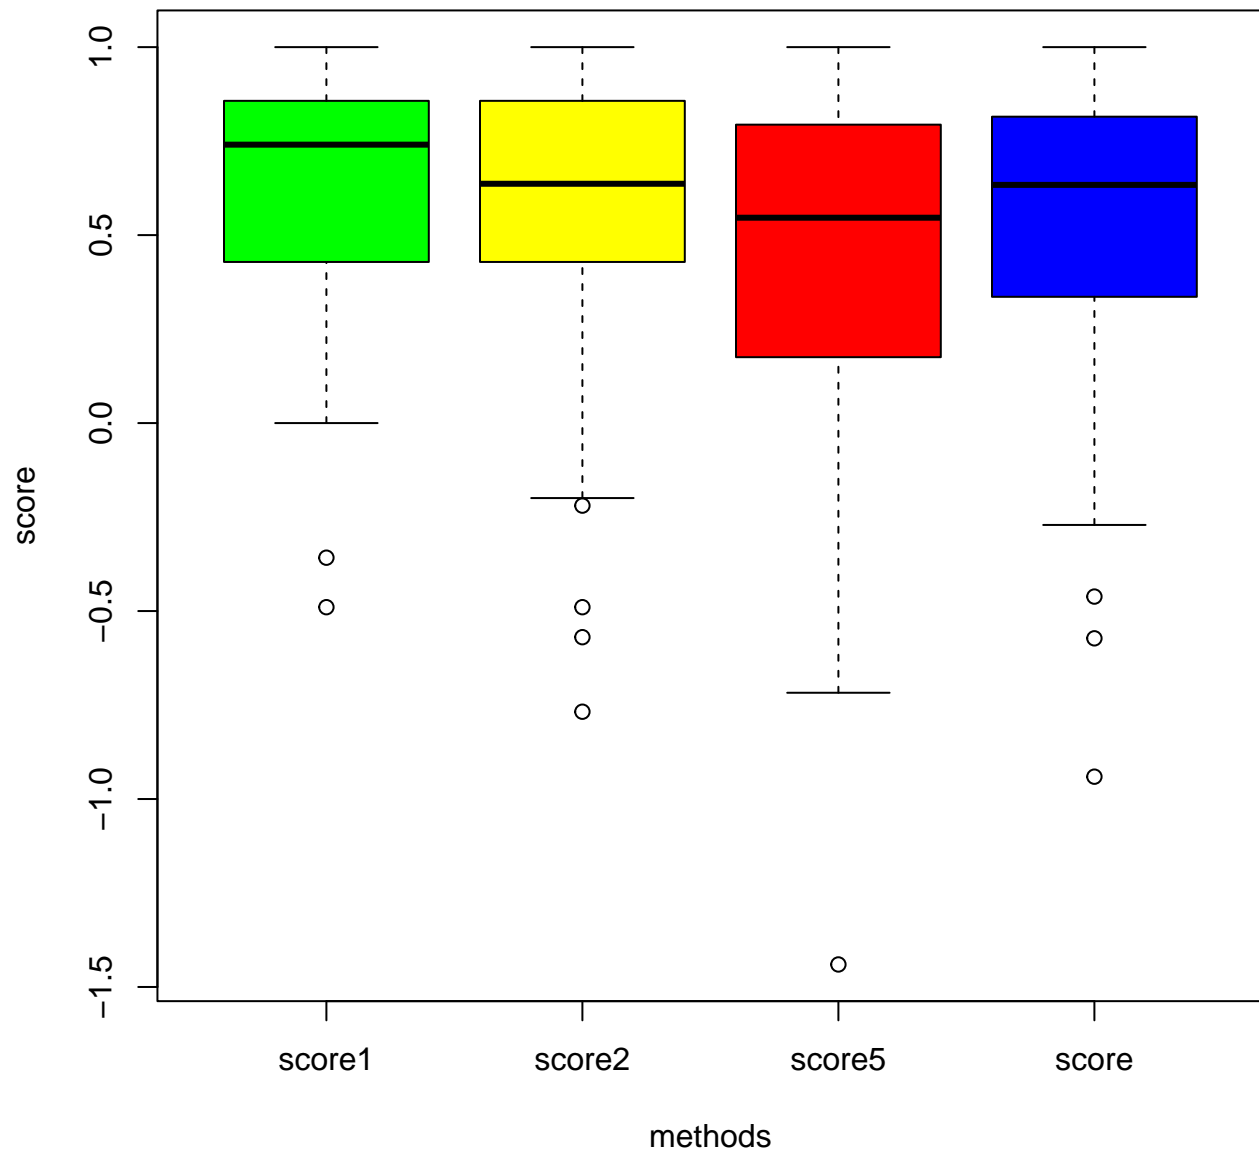

Supplement: s1 [file s1]

# multiple myeloma\_stability analysis

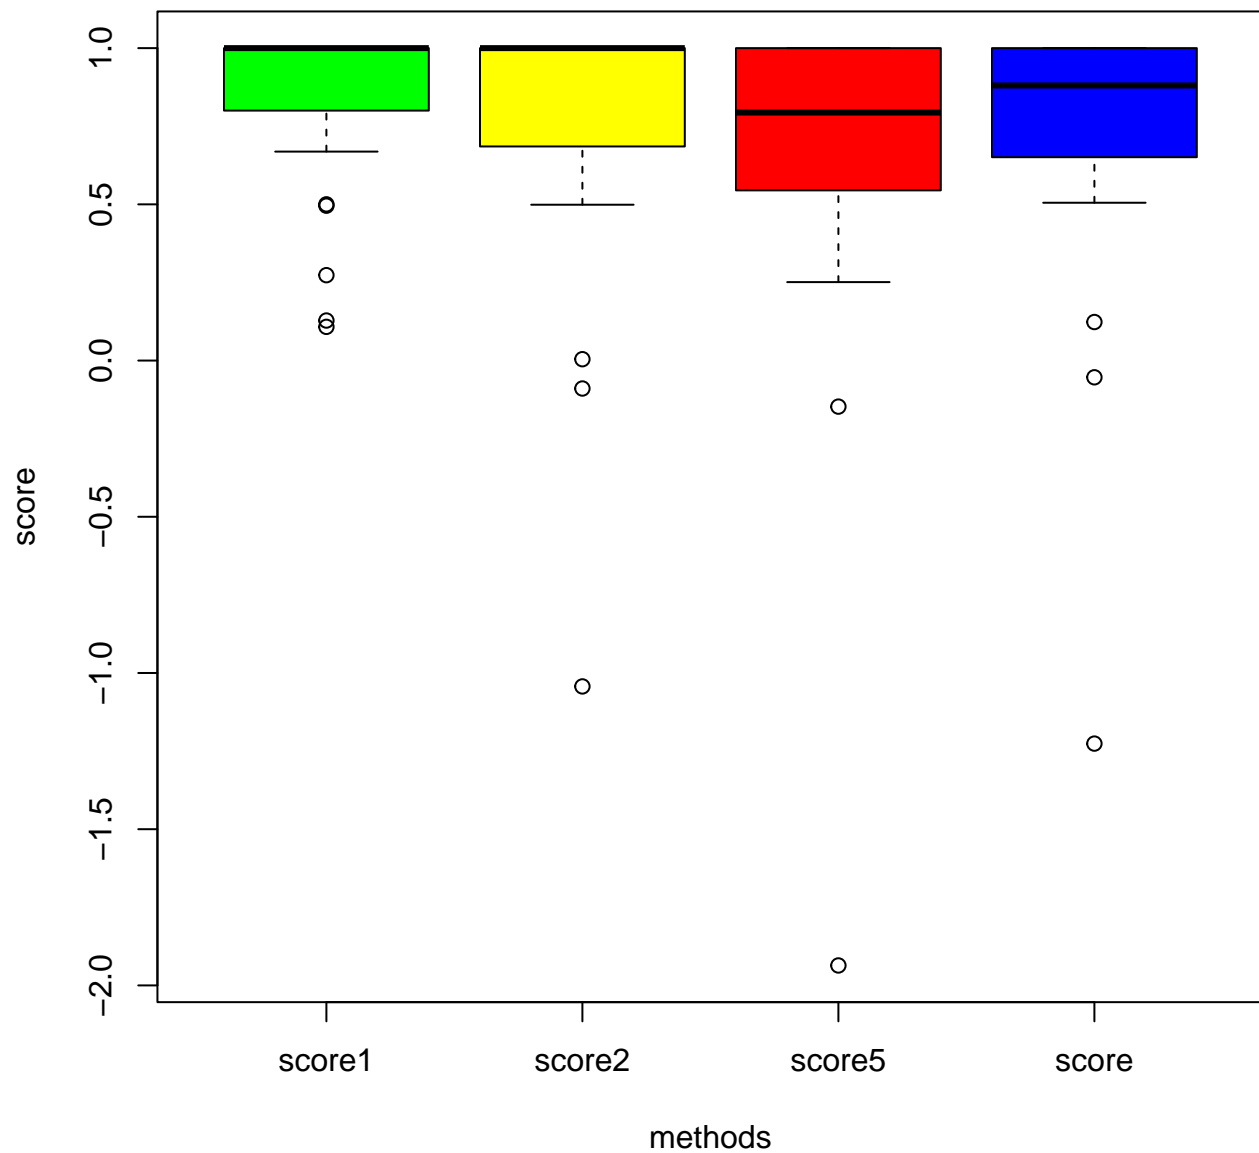

Supplement: s1 [file s1]

# gallbladder cancer\_stability analysis

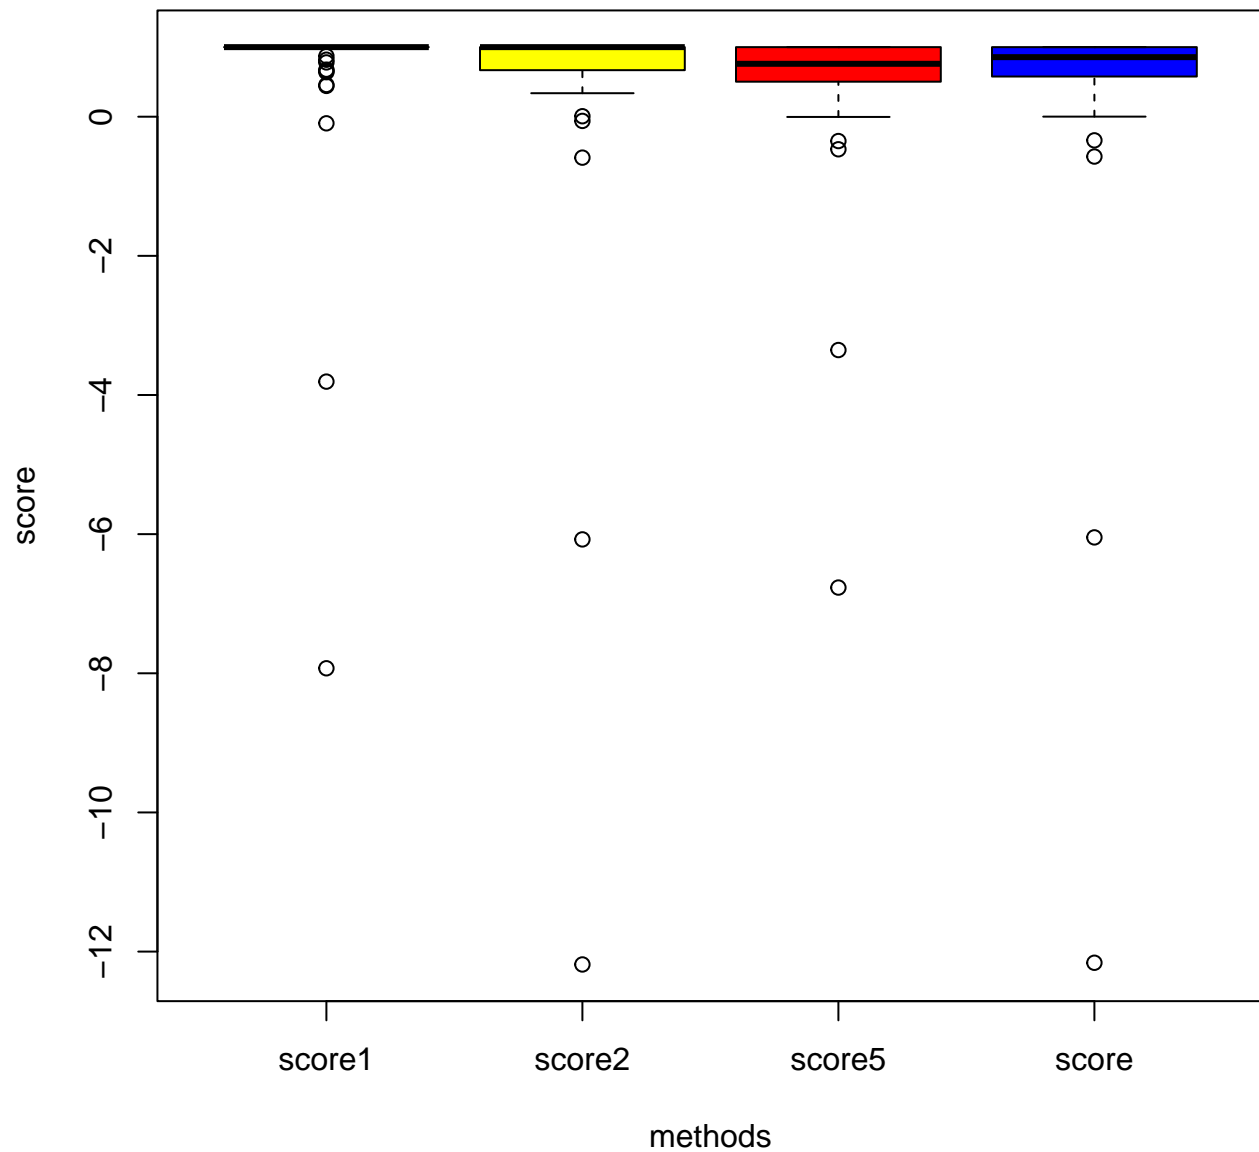

Supplement: s1 [file s1]

# intermediate coronary syndrome\_stability analysis

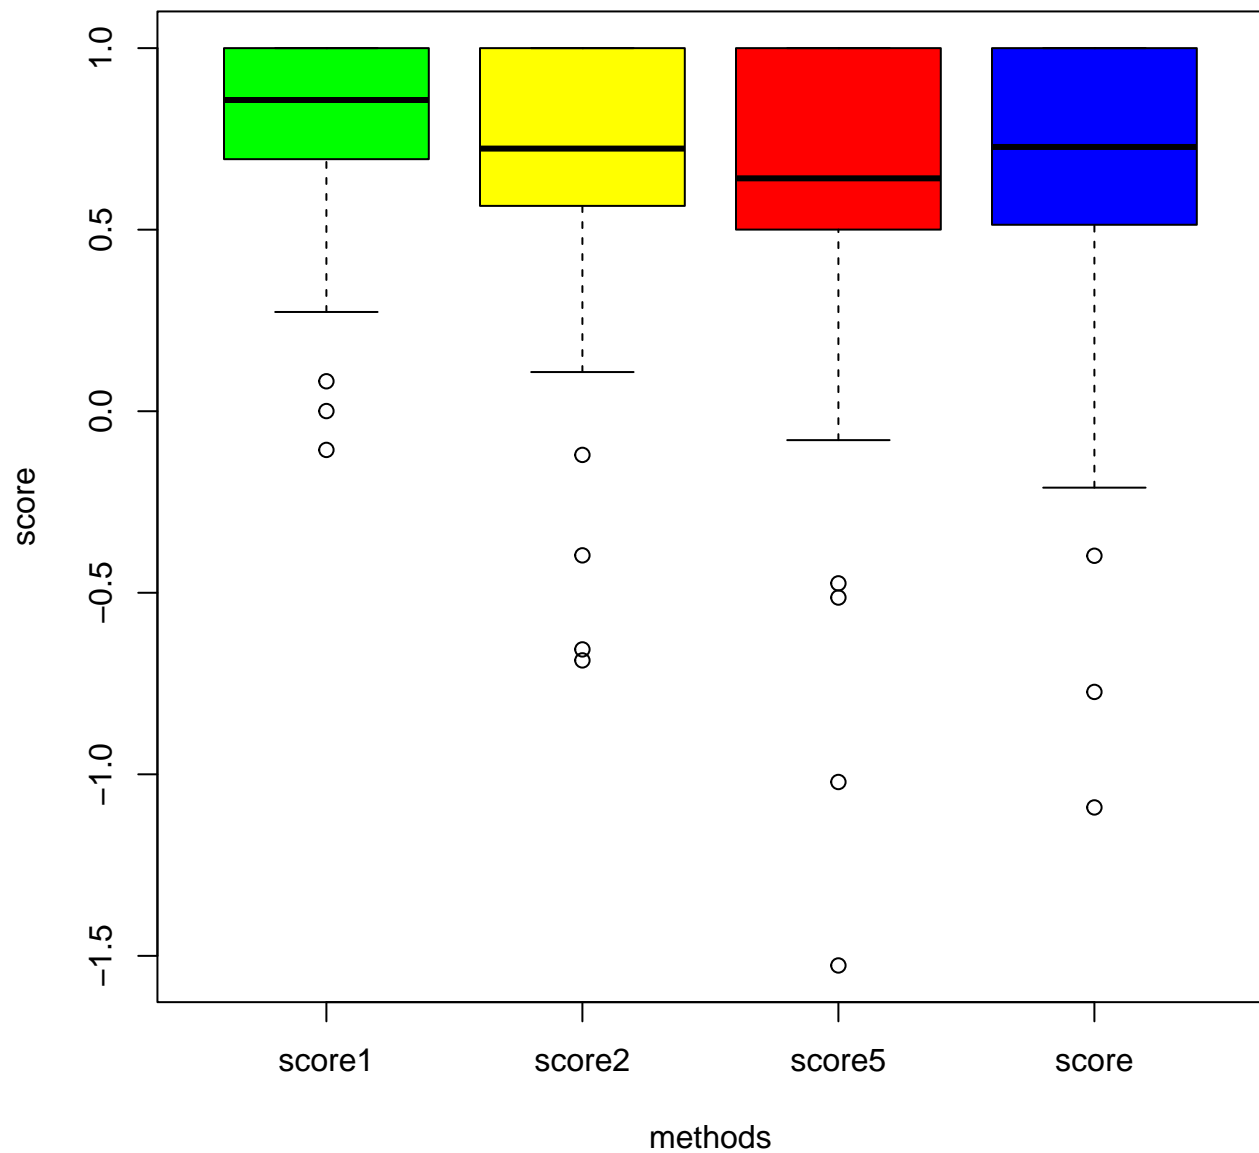

Supplement: s1 [file s1]

# ovarian cancer\_stability analysis

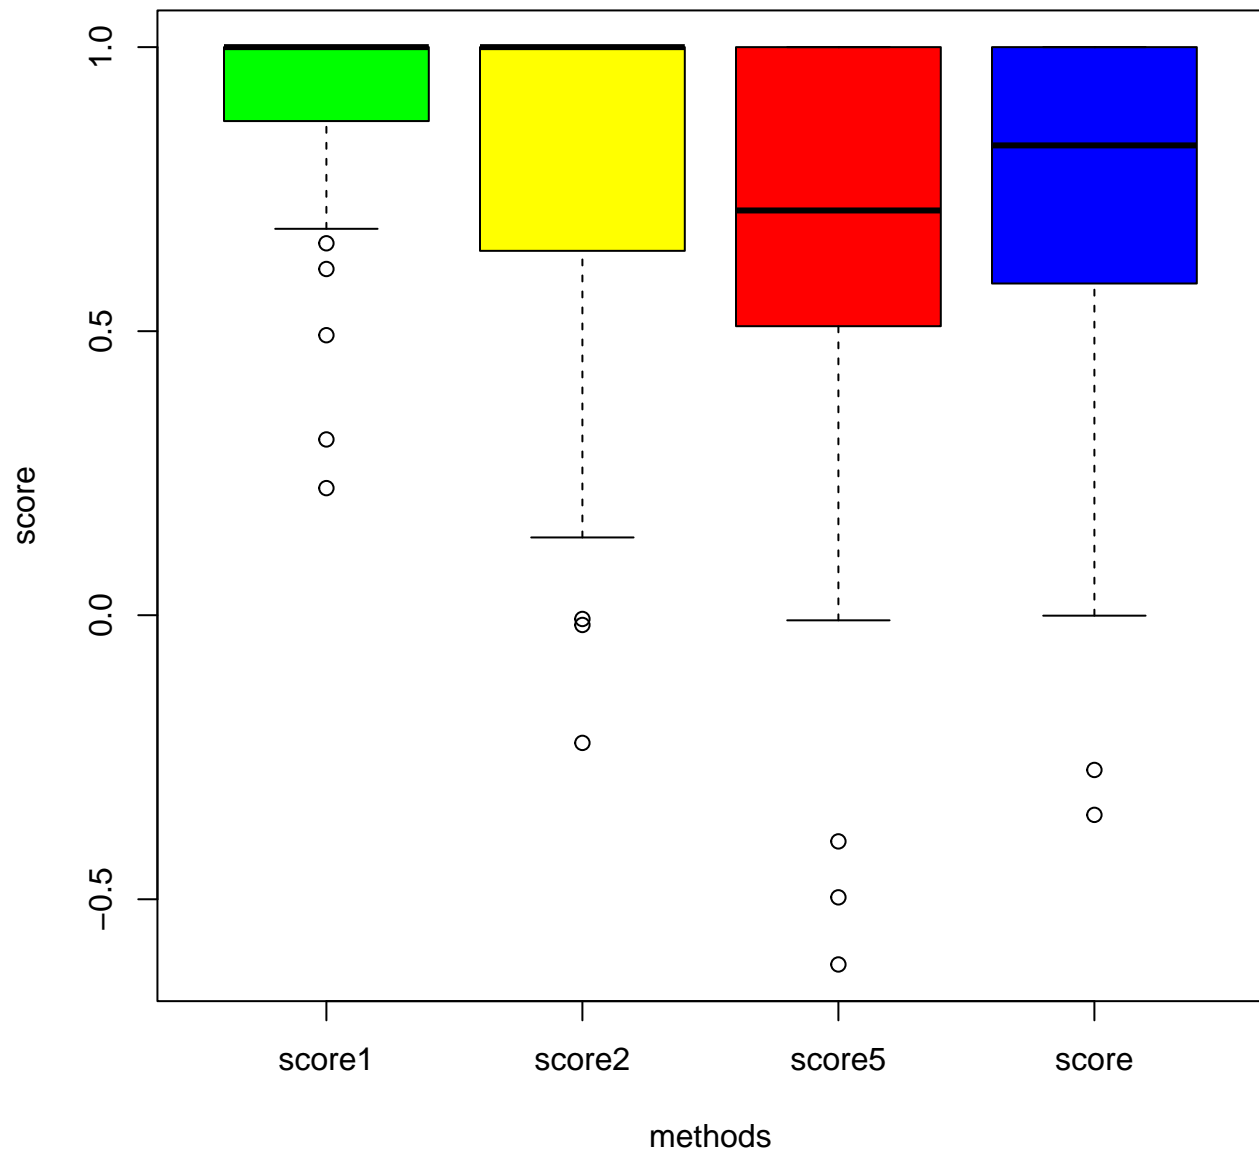

Supplement: s1 [file s1]

# invasive lobular carcinoma\_stability analysis

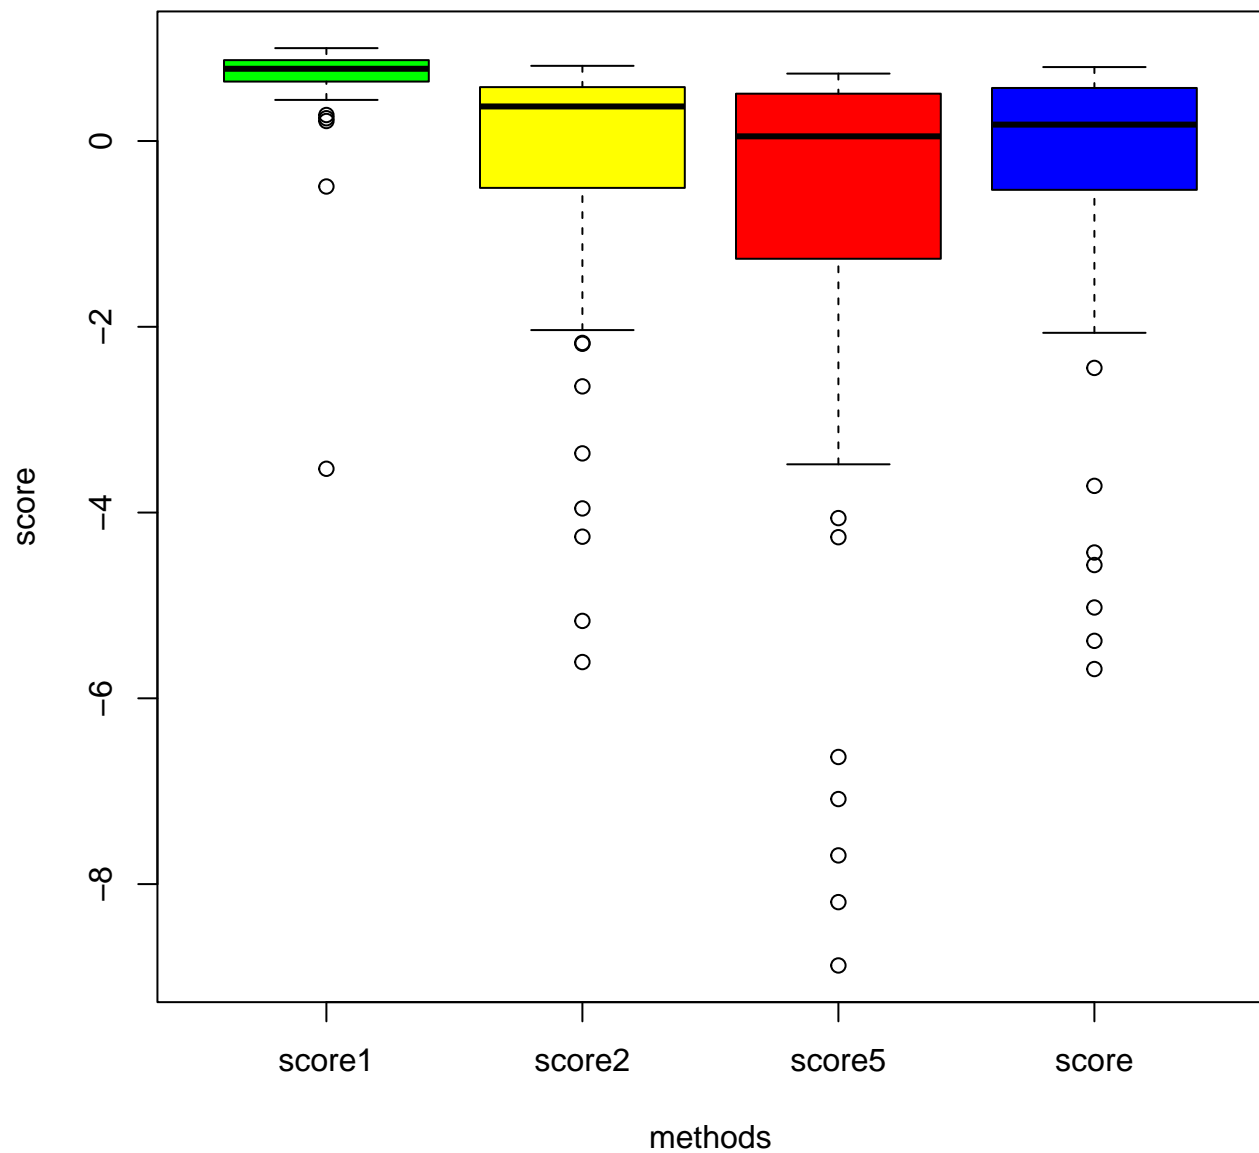

Supplement: s1 [file s1]

# renal cell carcinoma\_stability analysis

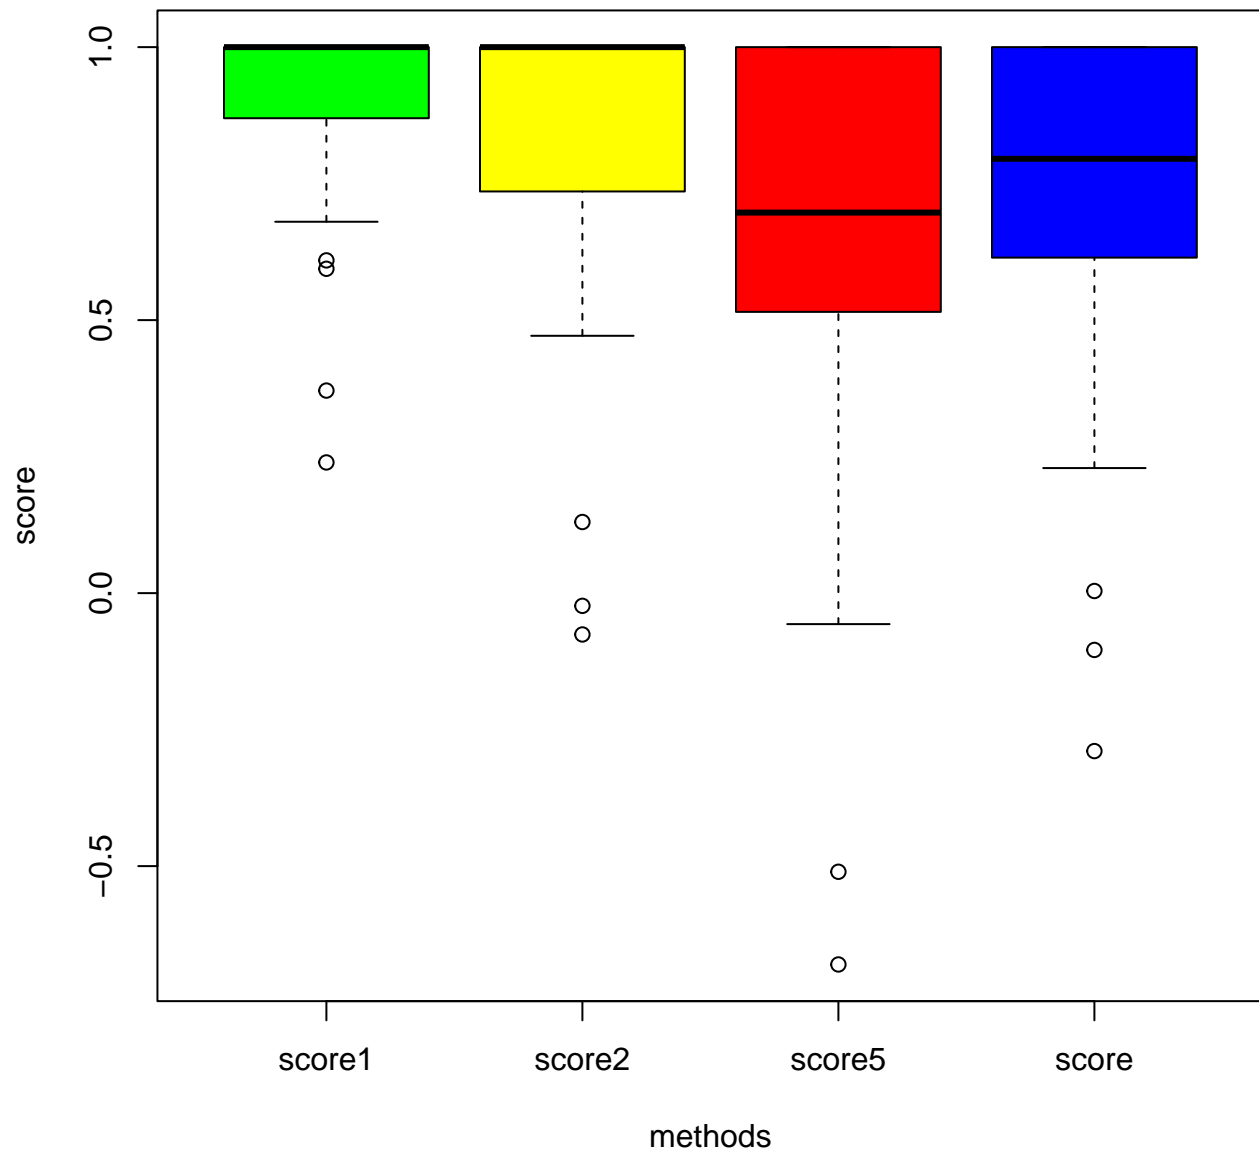

Supplement: s1 [file s1]

# esophageal cancer\_stability analysis

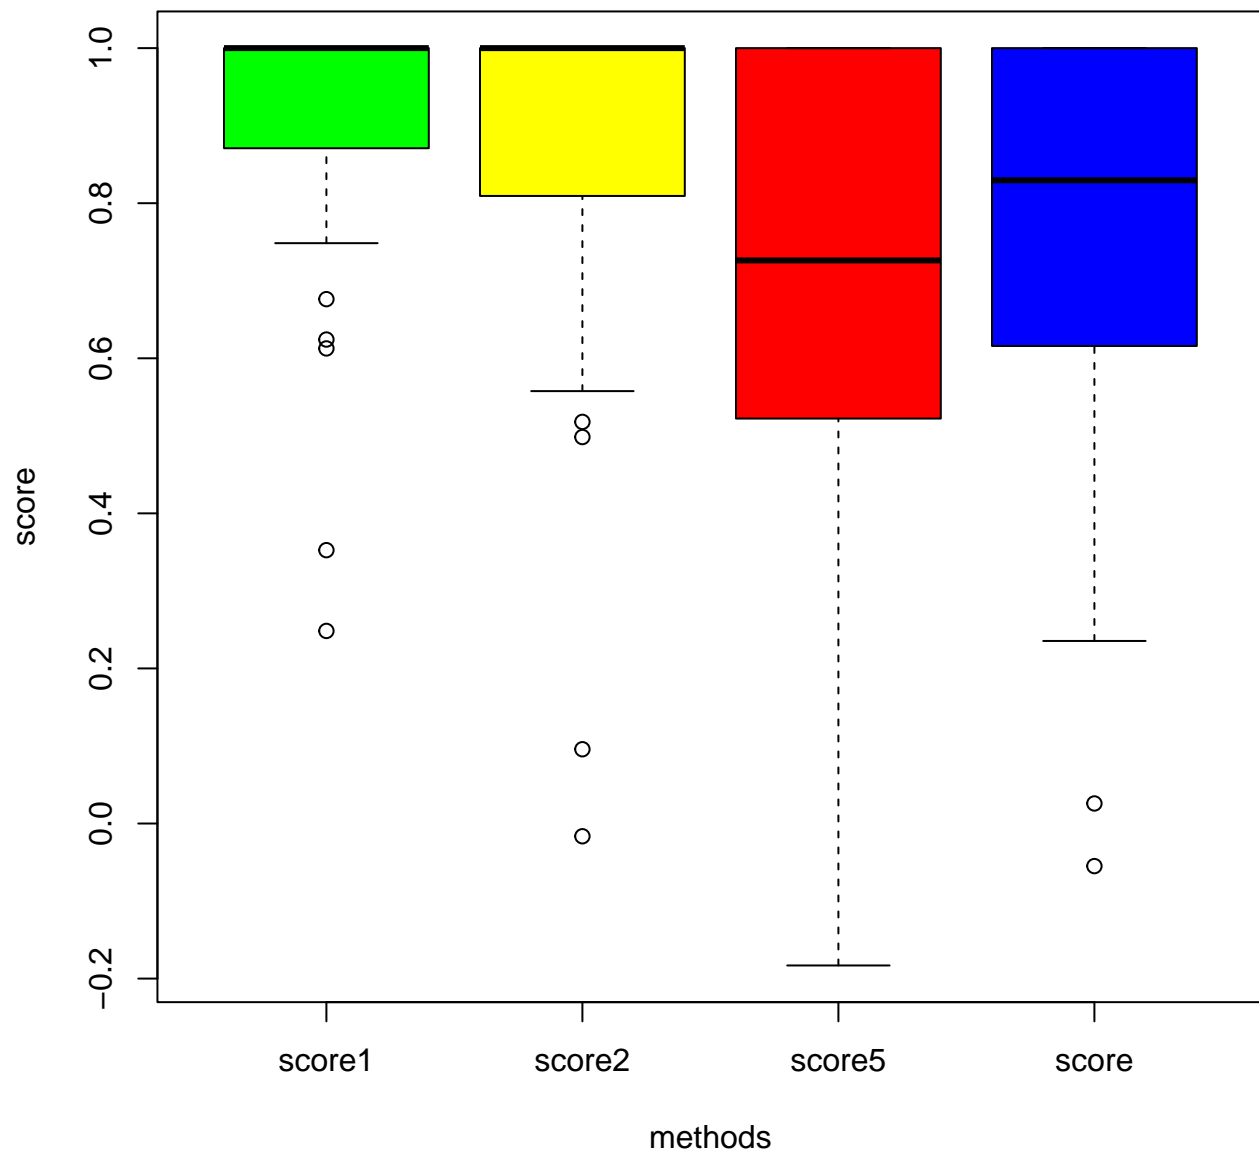

Supplement: s1 [file s1]

# adrenocortical carcinoma\_stability analysis

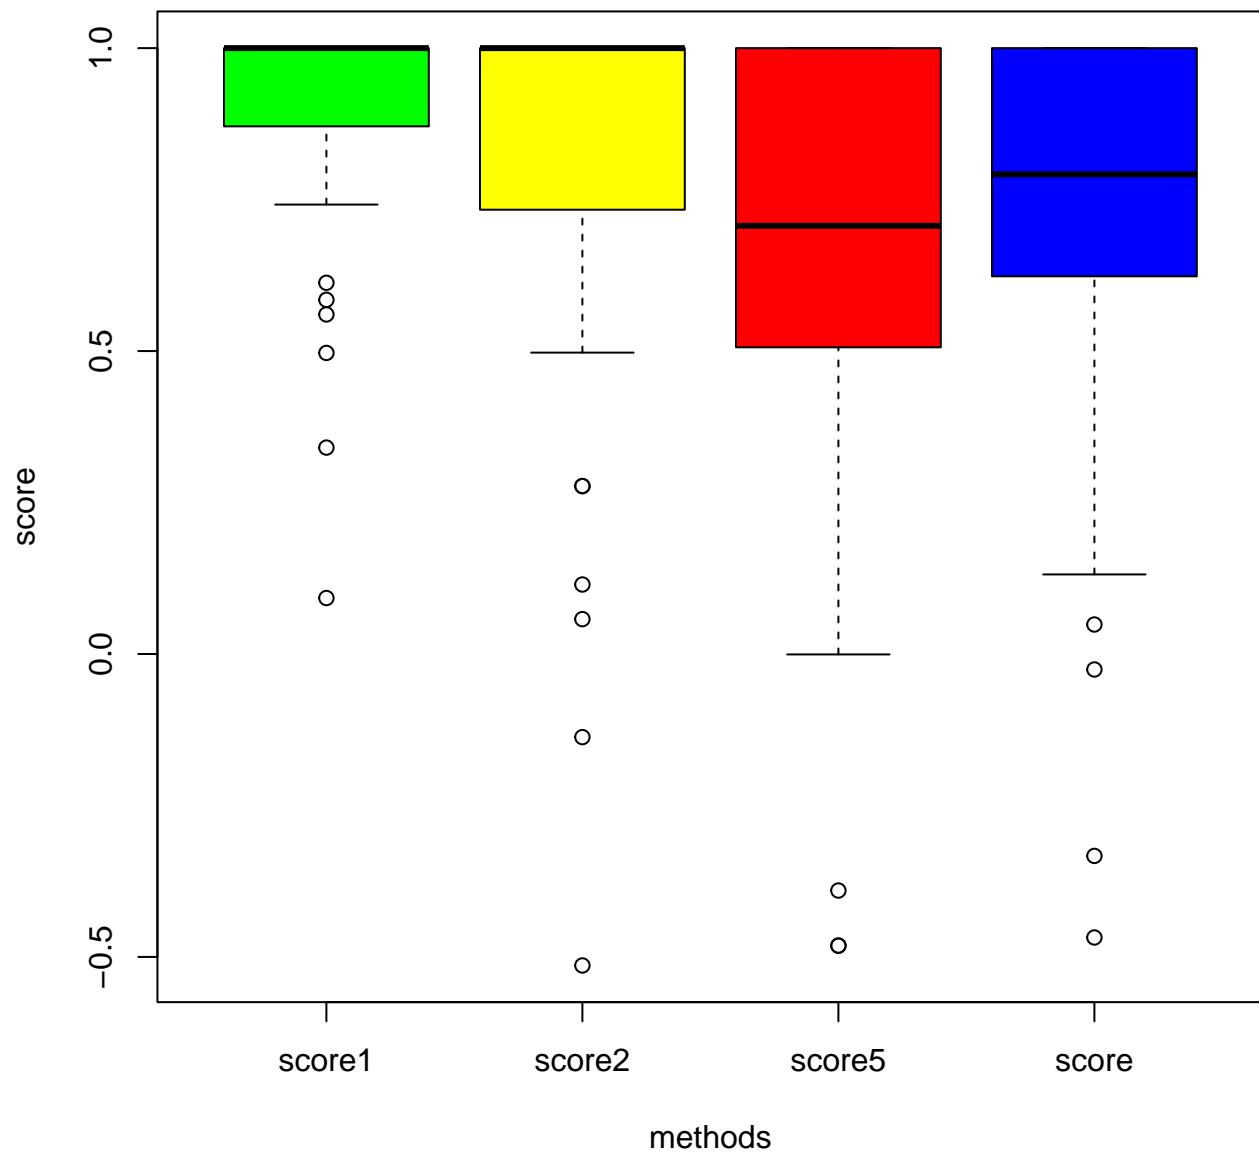

Supplement: s1 [file s1]

# inflammatory breast carcinoma\_stability analysis

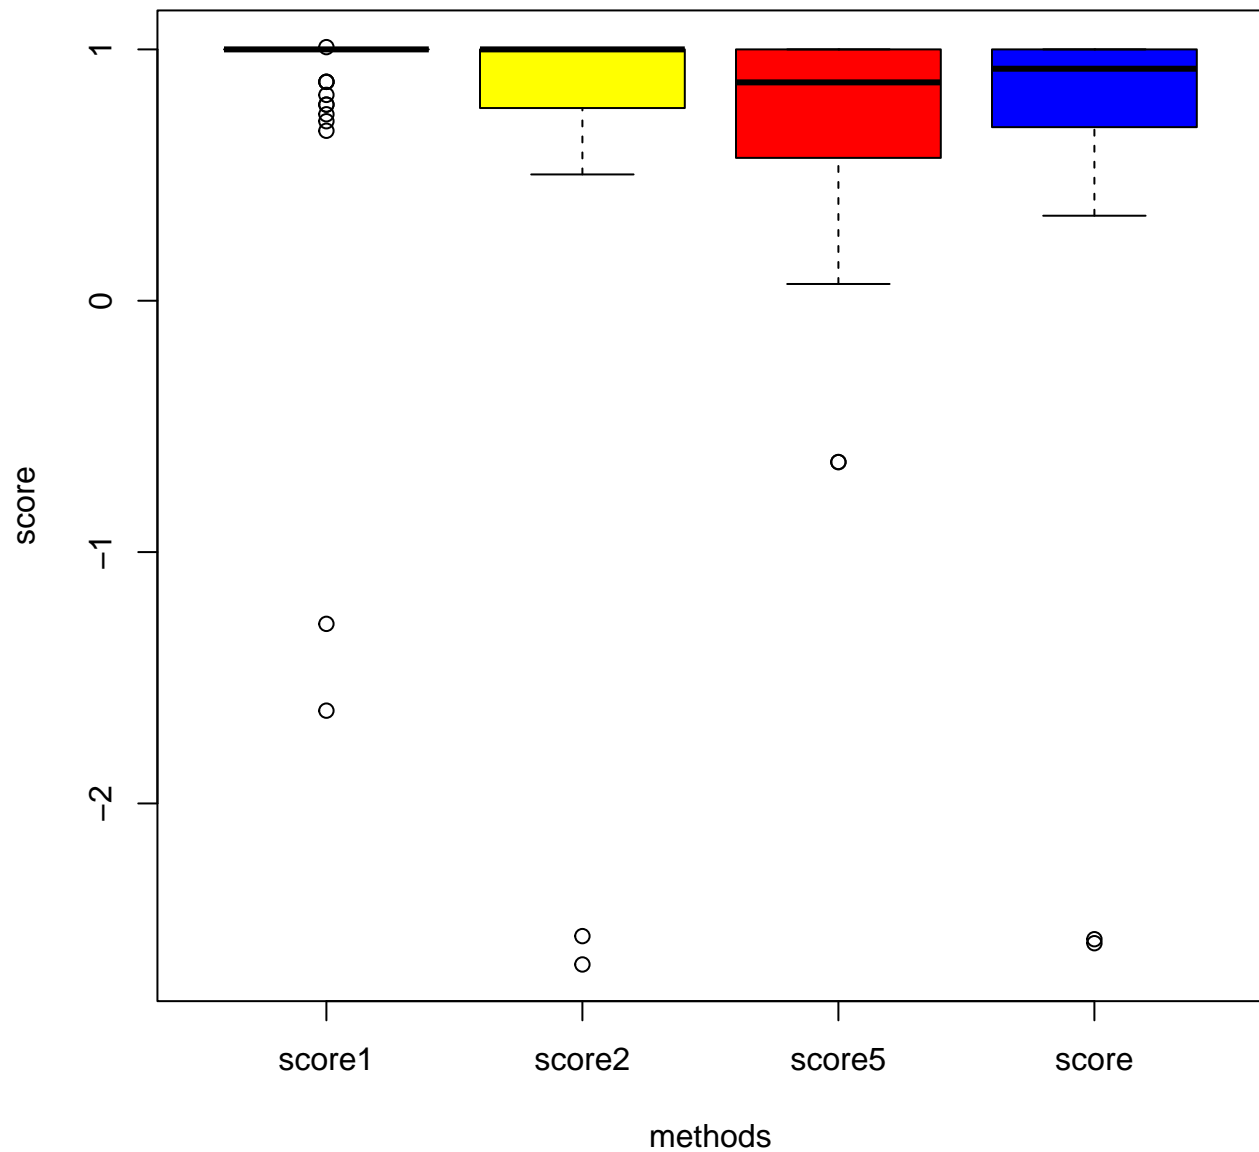

Supplement: s1 [file s1]

# nasopharynx carcinoma\_stability analysis

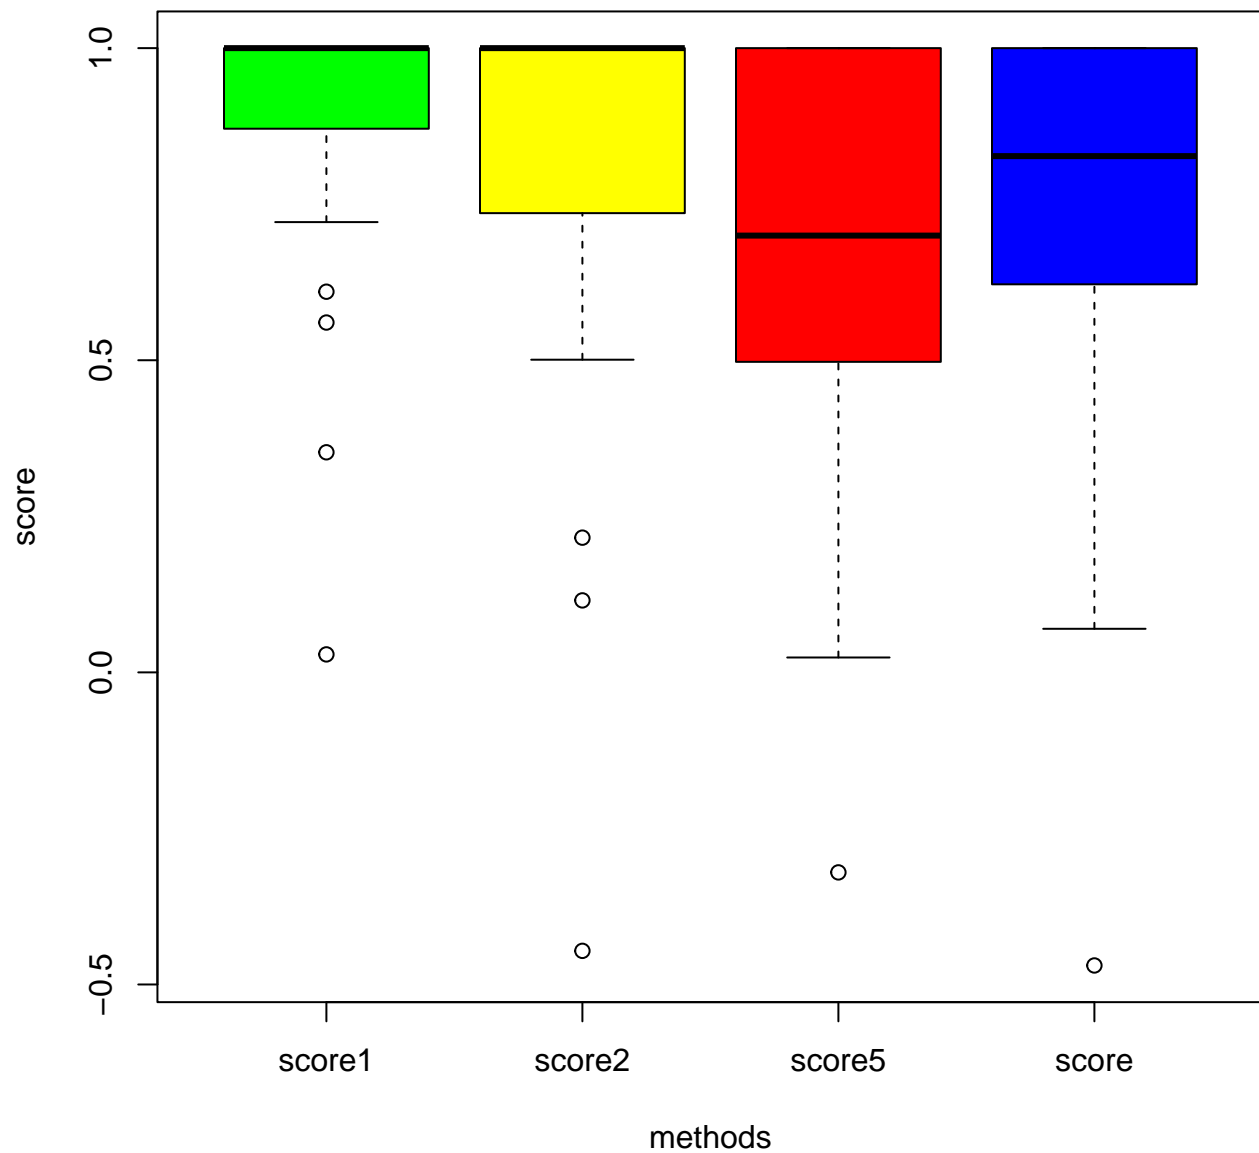

Supplement: s1 [file s1]

# intracranial thrombosis\_stability analysis

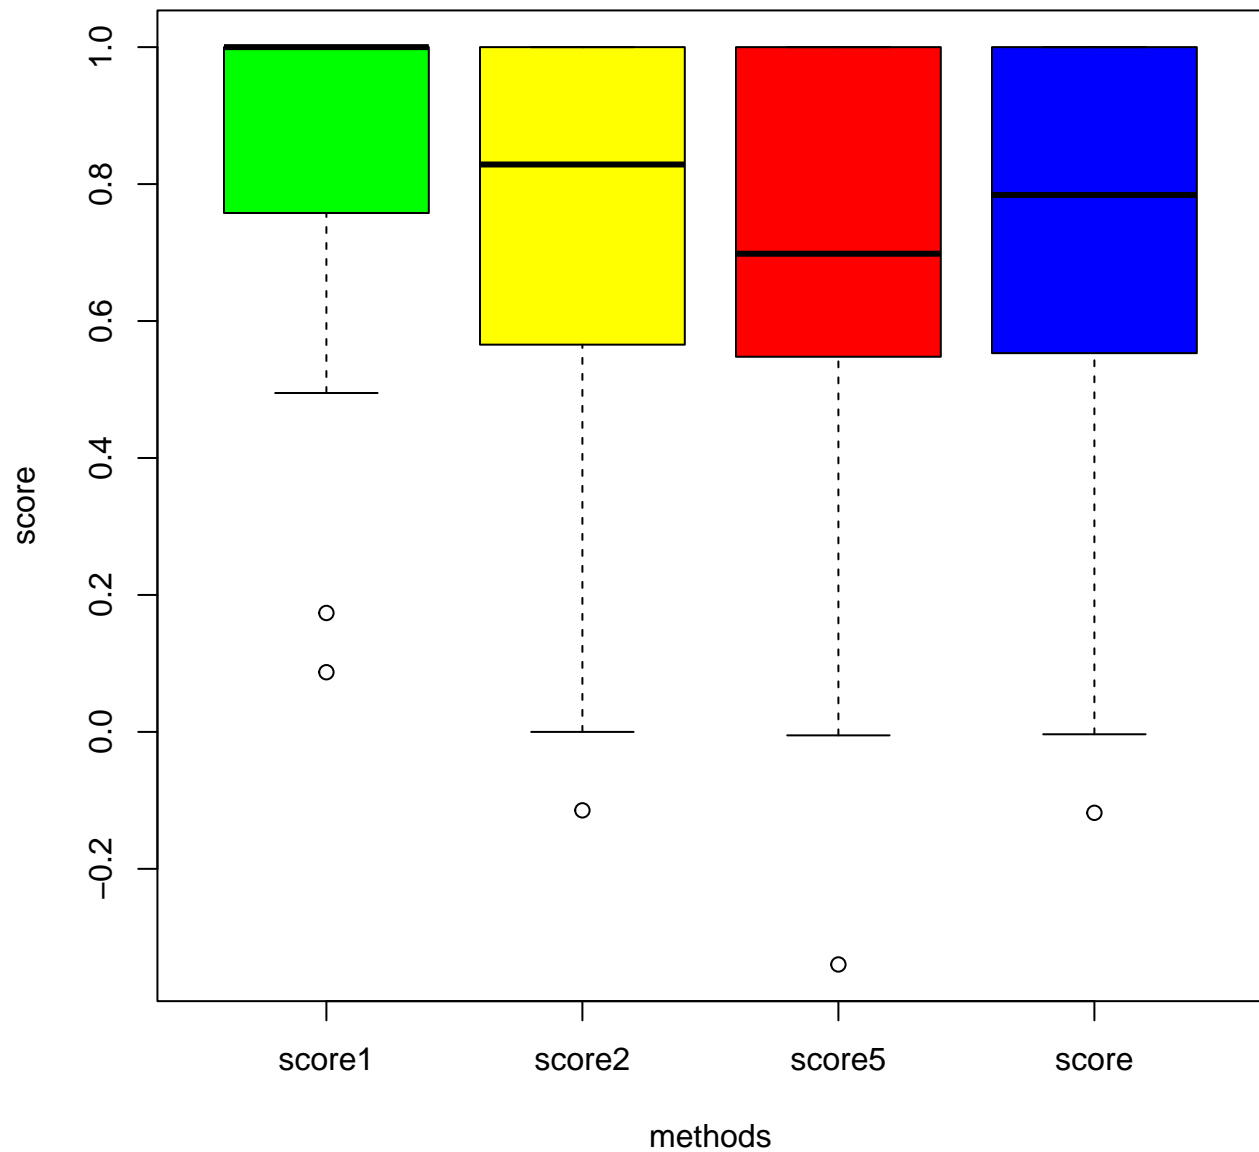

Supplement: s1 [file s1]

# myasthenia gravis\_stability analysis

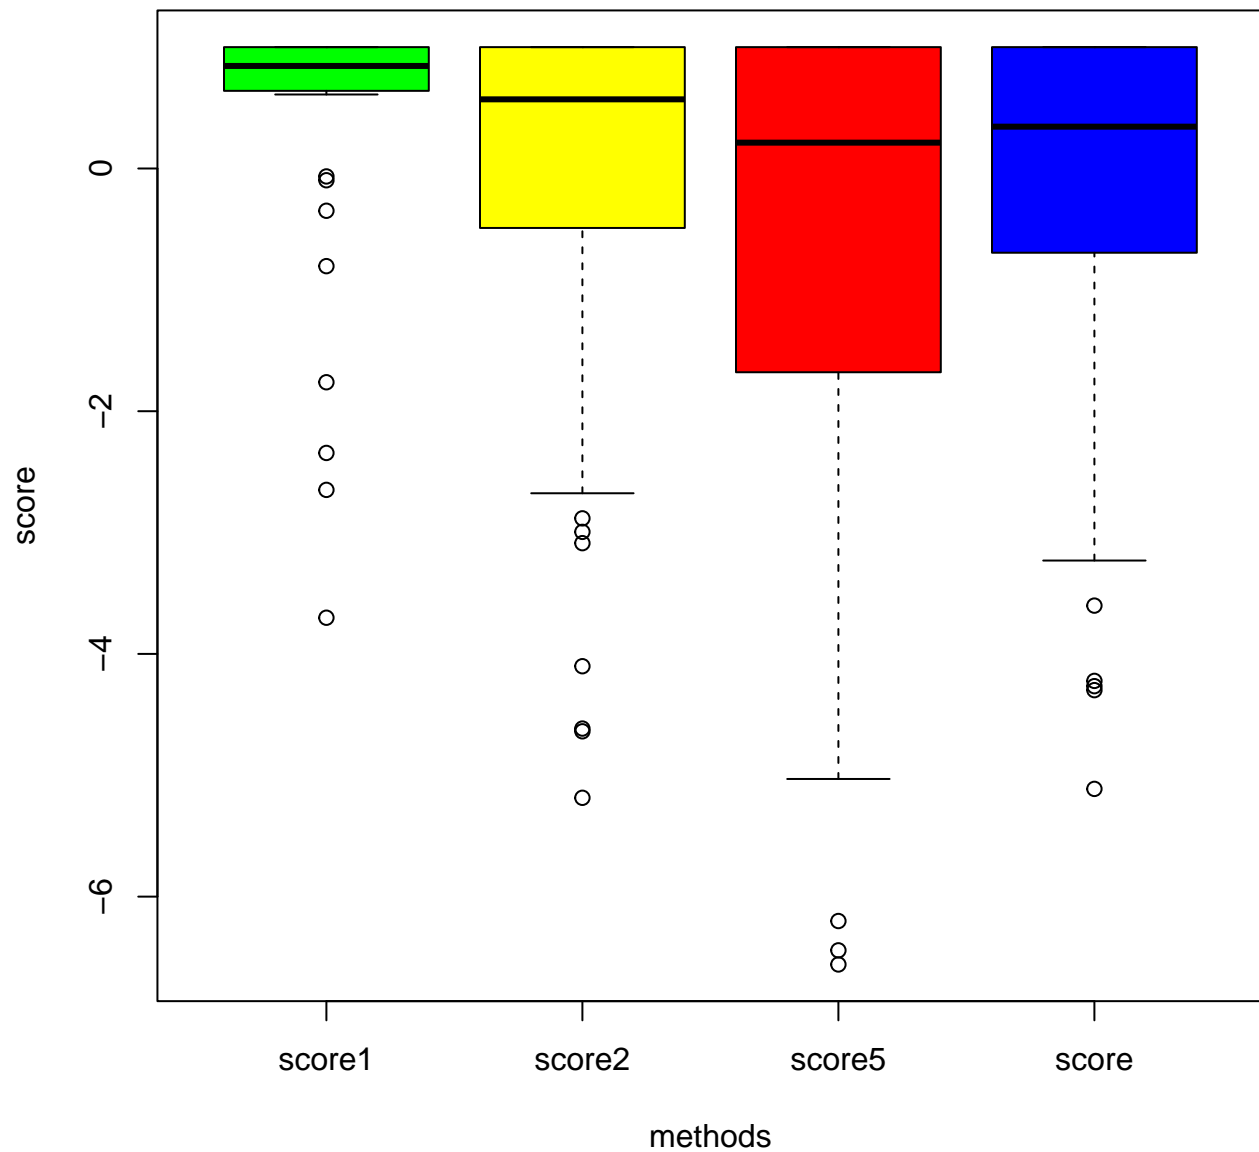

Supplement: s1 [file s1]

# larynx cancer\_stability analysis

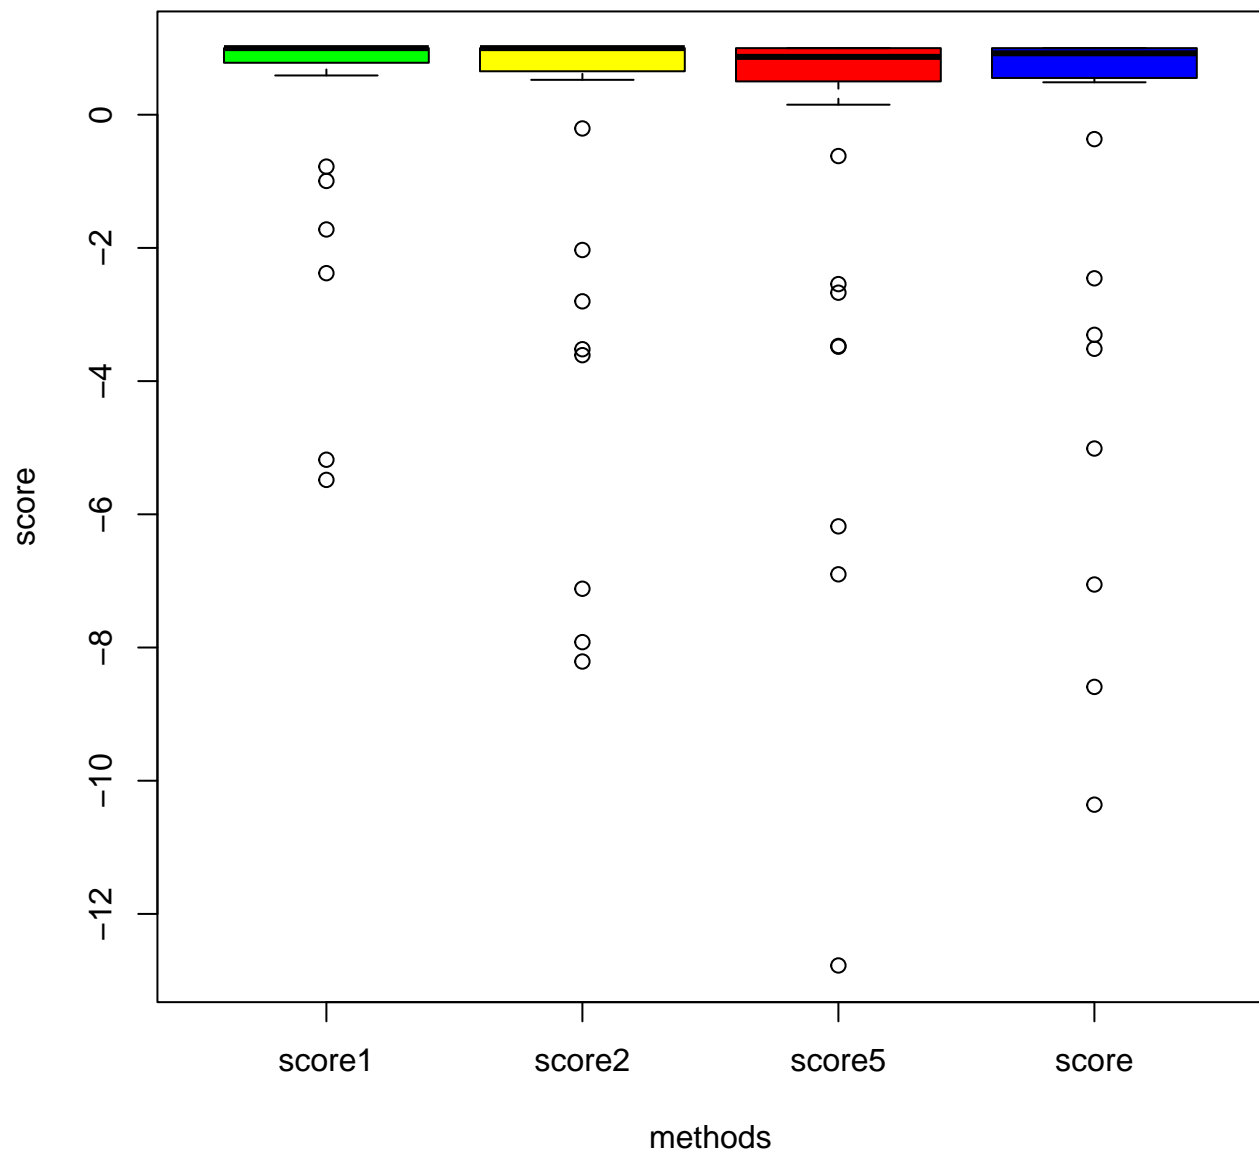

Supplement: s1 [file s1]

# uterine cancer\_stability analysis

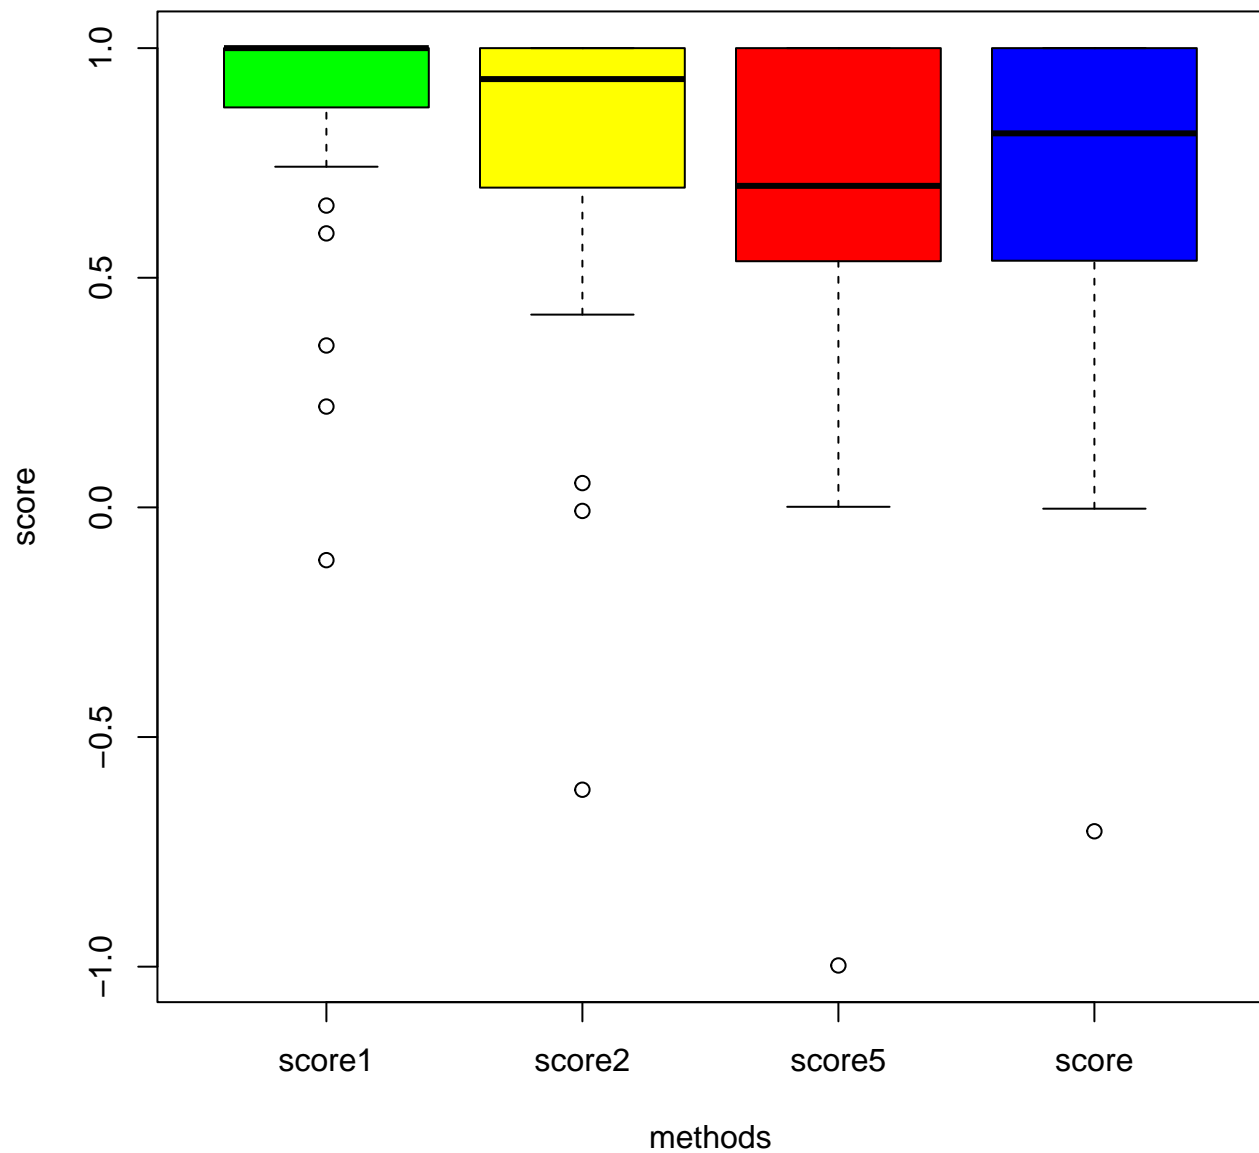

Supplement: s1 [file s1]

# carotid artery thrombosis\_stability analysis

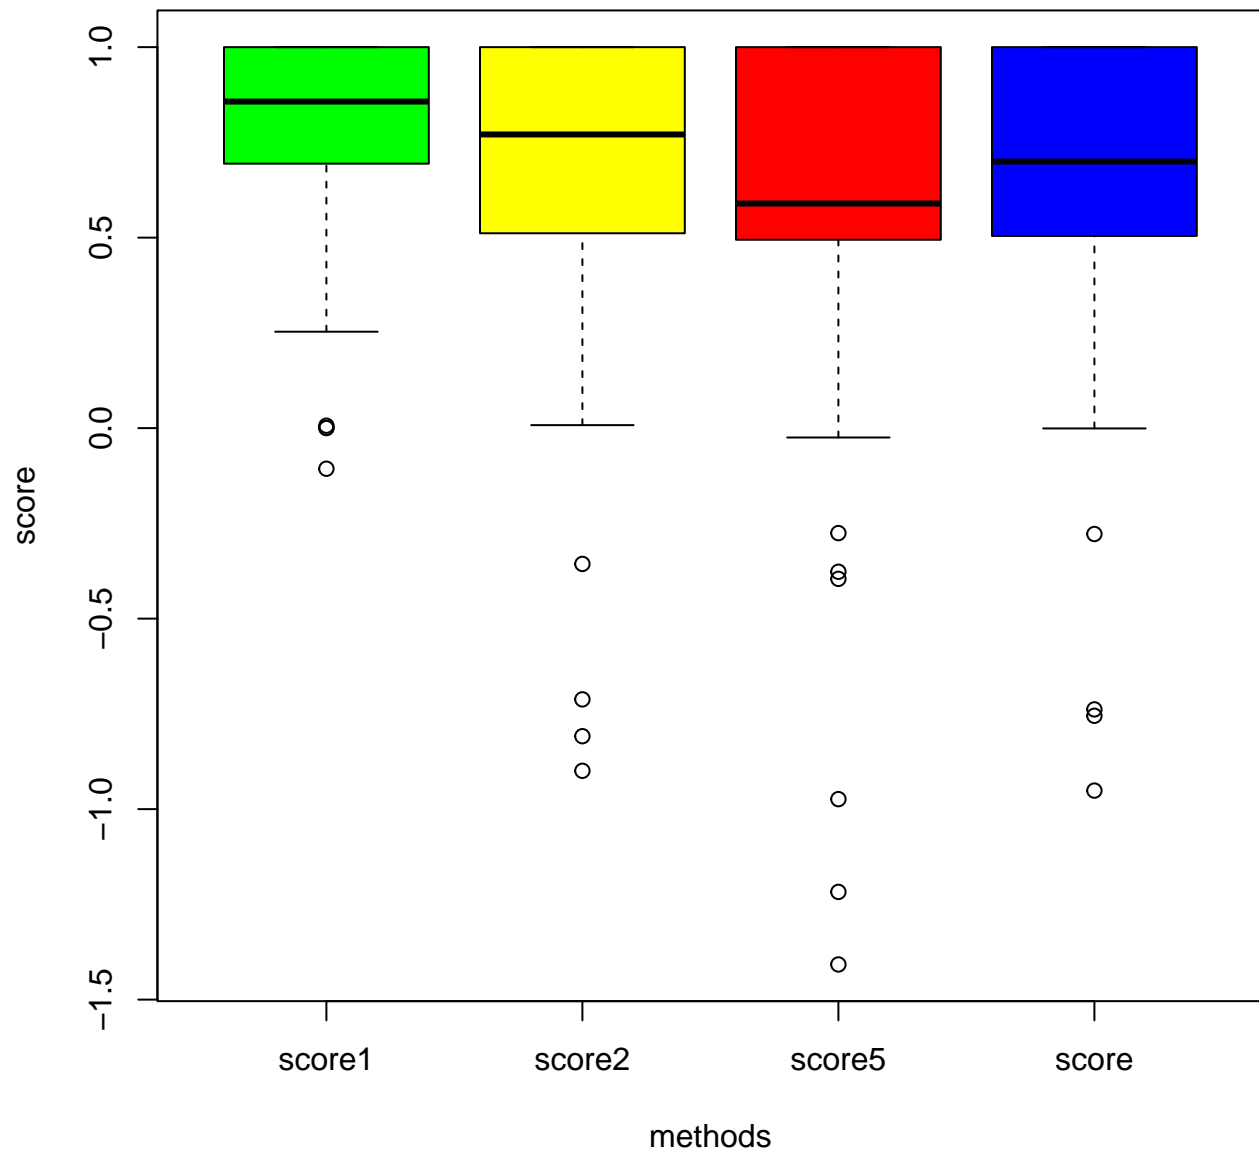

Supplement: s1 [file s1]

# endometrial cancer\_stability analysis

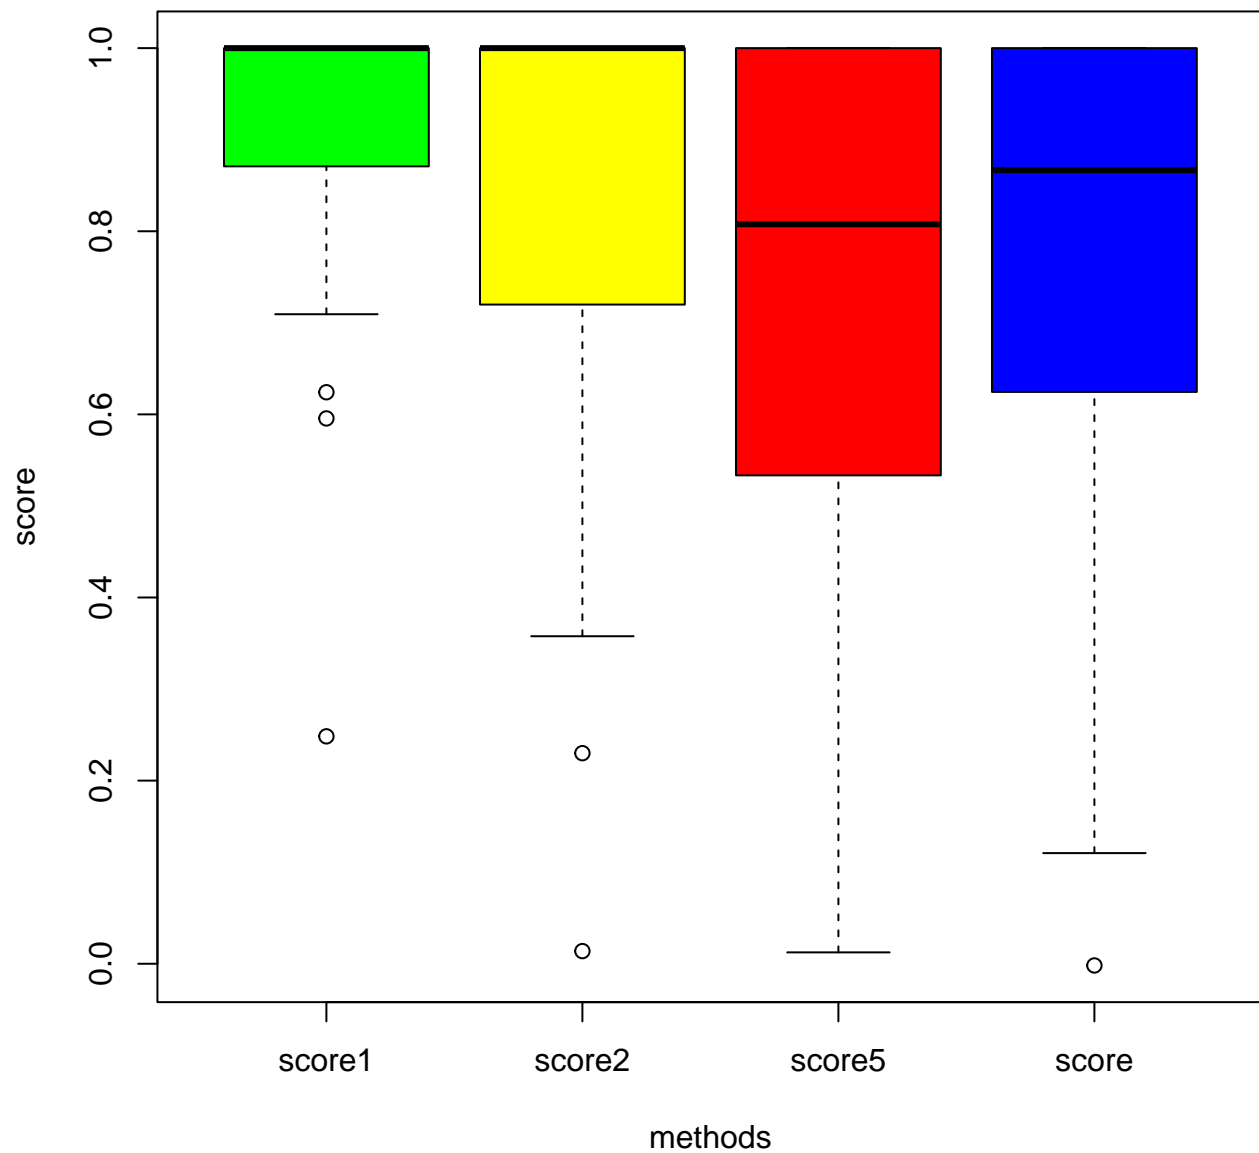

Supplement: s1 [file s1]

# parathyroid carcinoma\_stability analysis

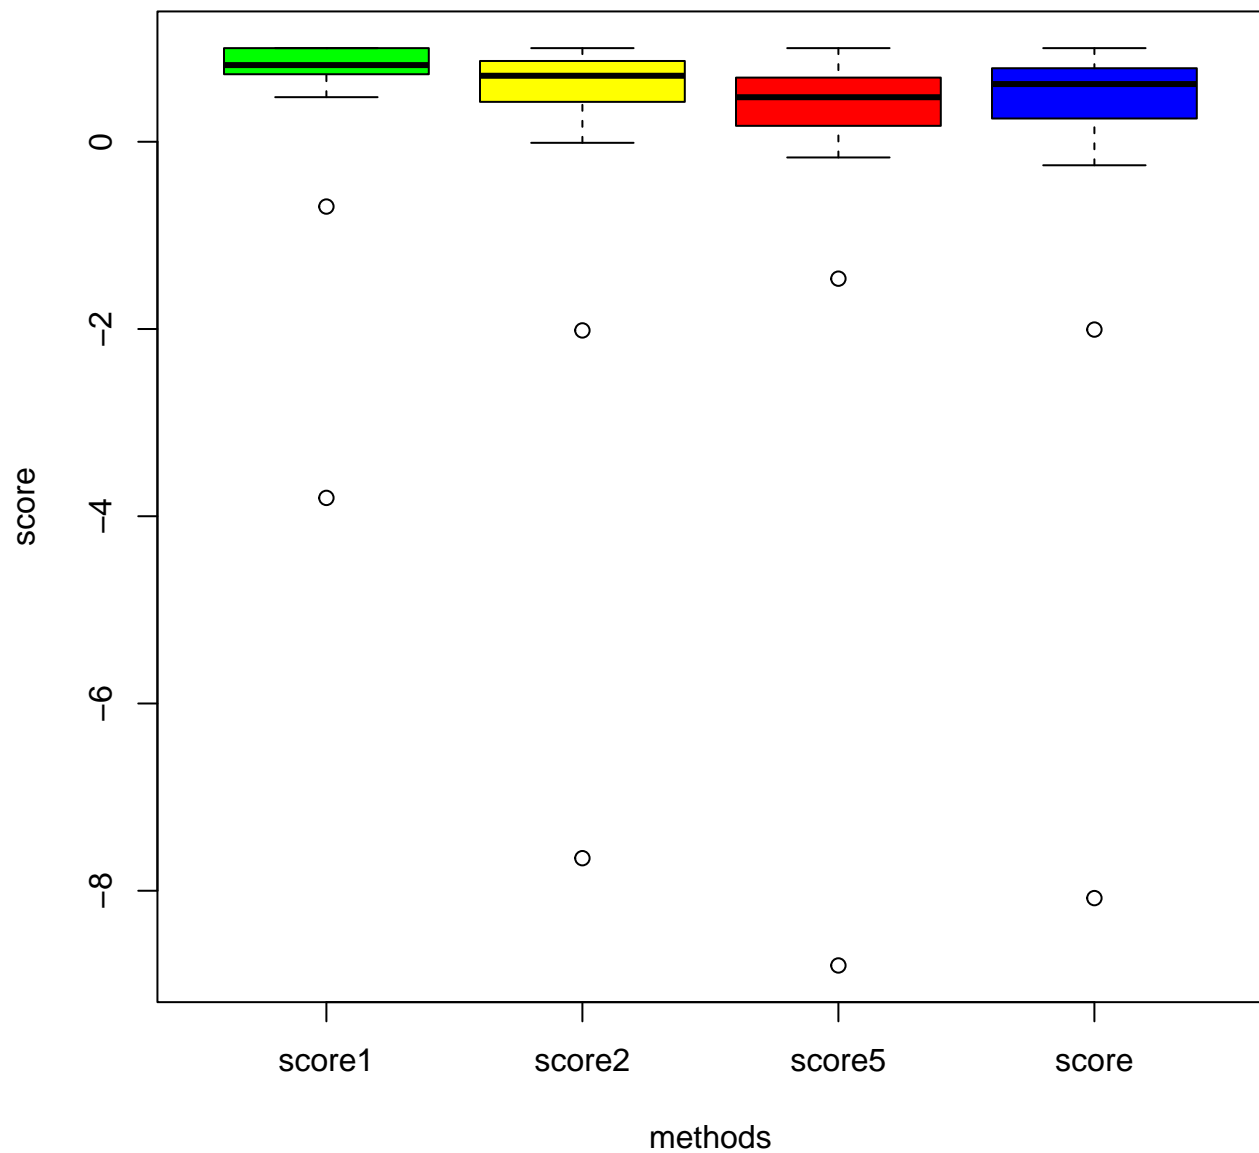

Supplement: s1 [file s1]

# pituitary cancer\_stability analysis

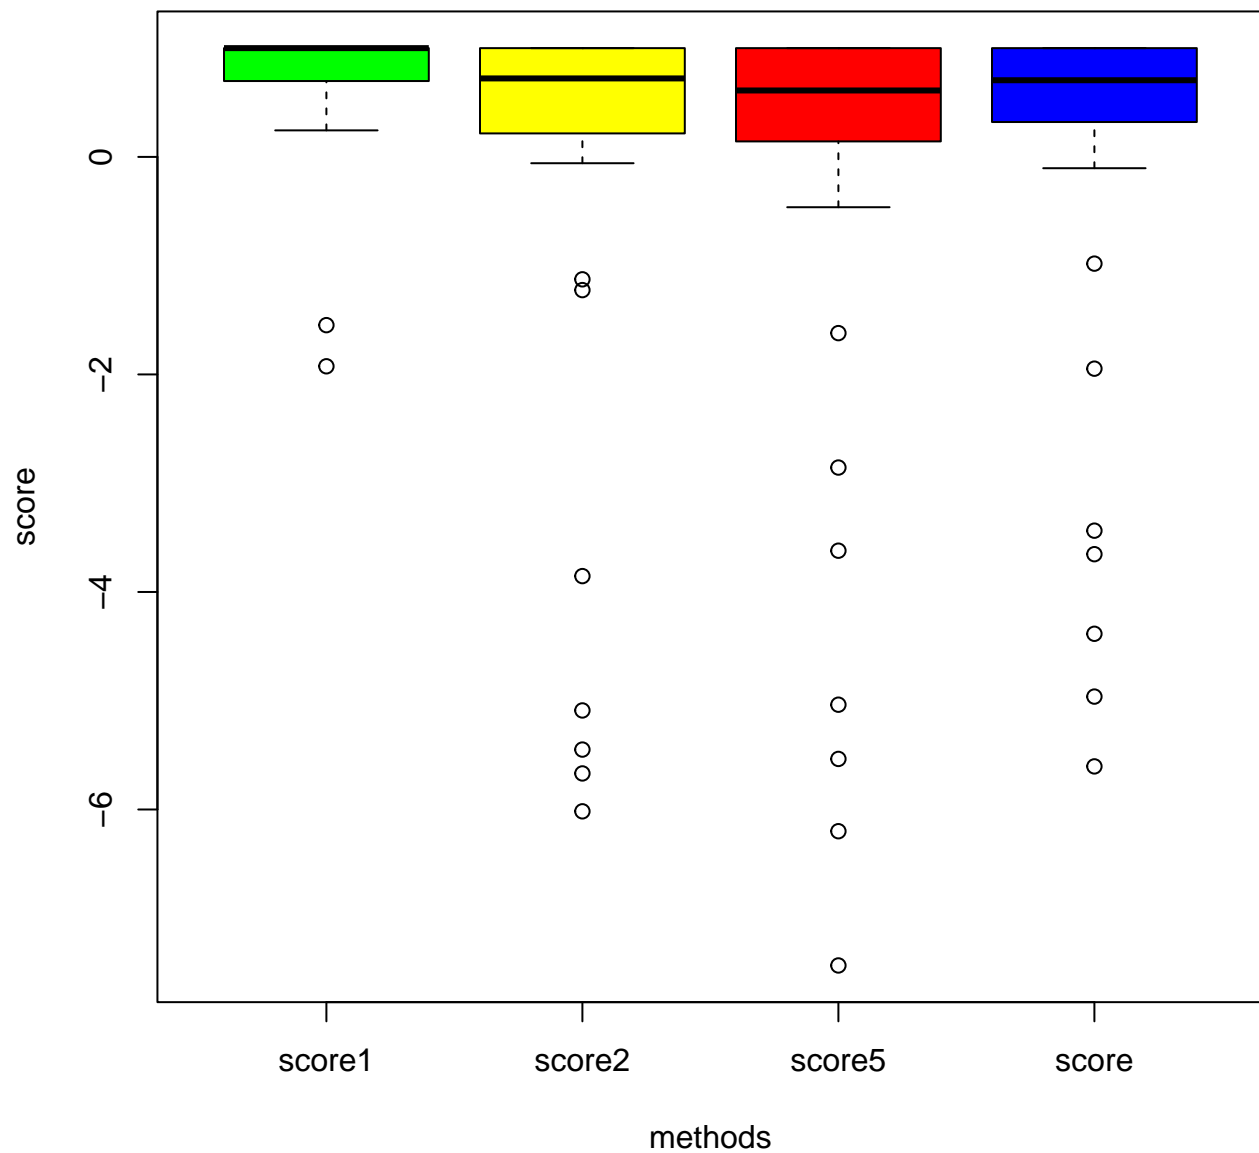

Supplement: s1 [file s1]

## Wegener's granulomatosis\_stability analysis

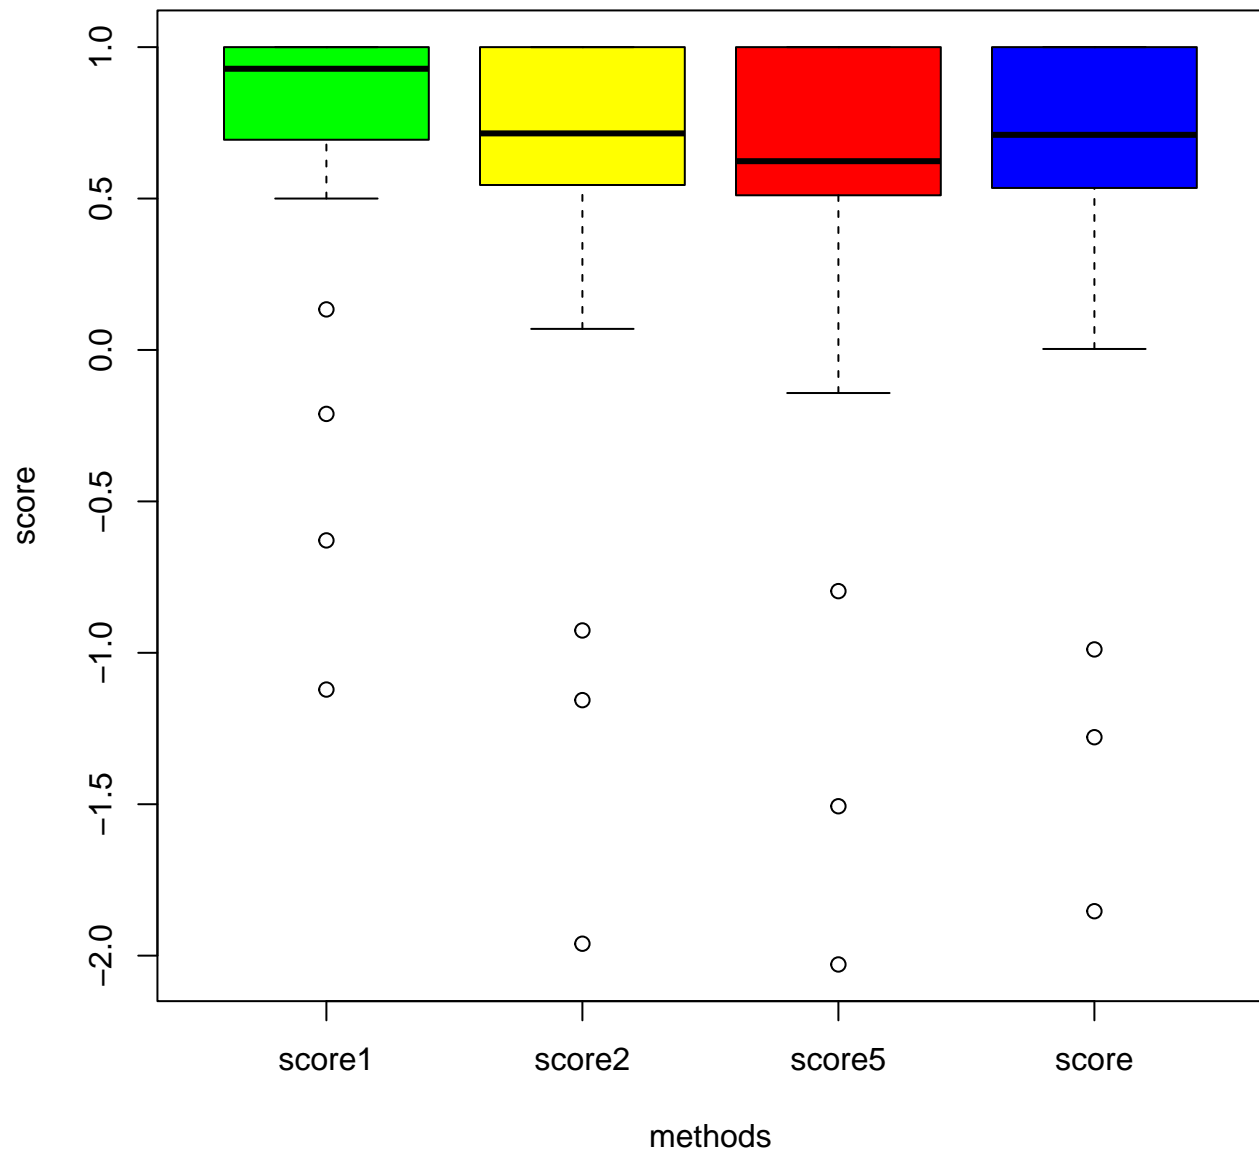

Supplement: s1 [file s1]

**coronary artery disease\_stability analysis**

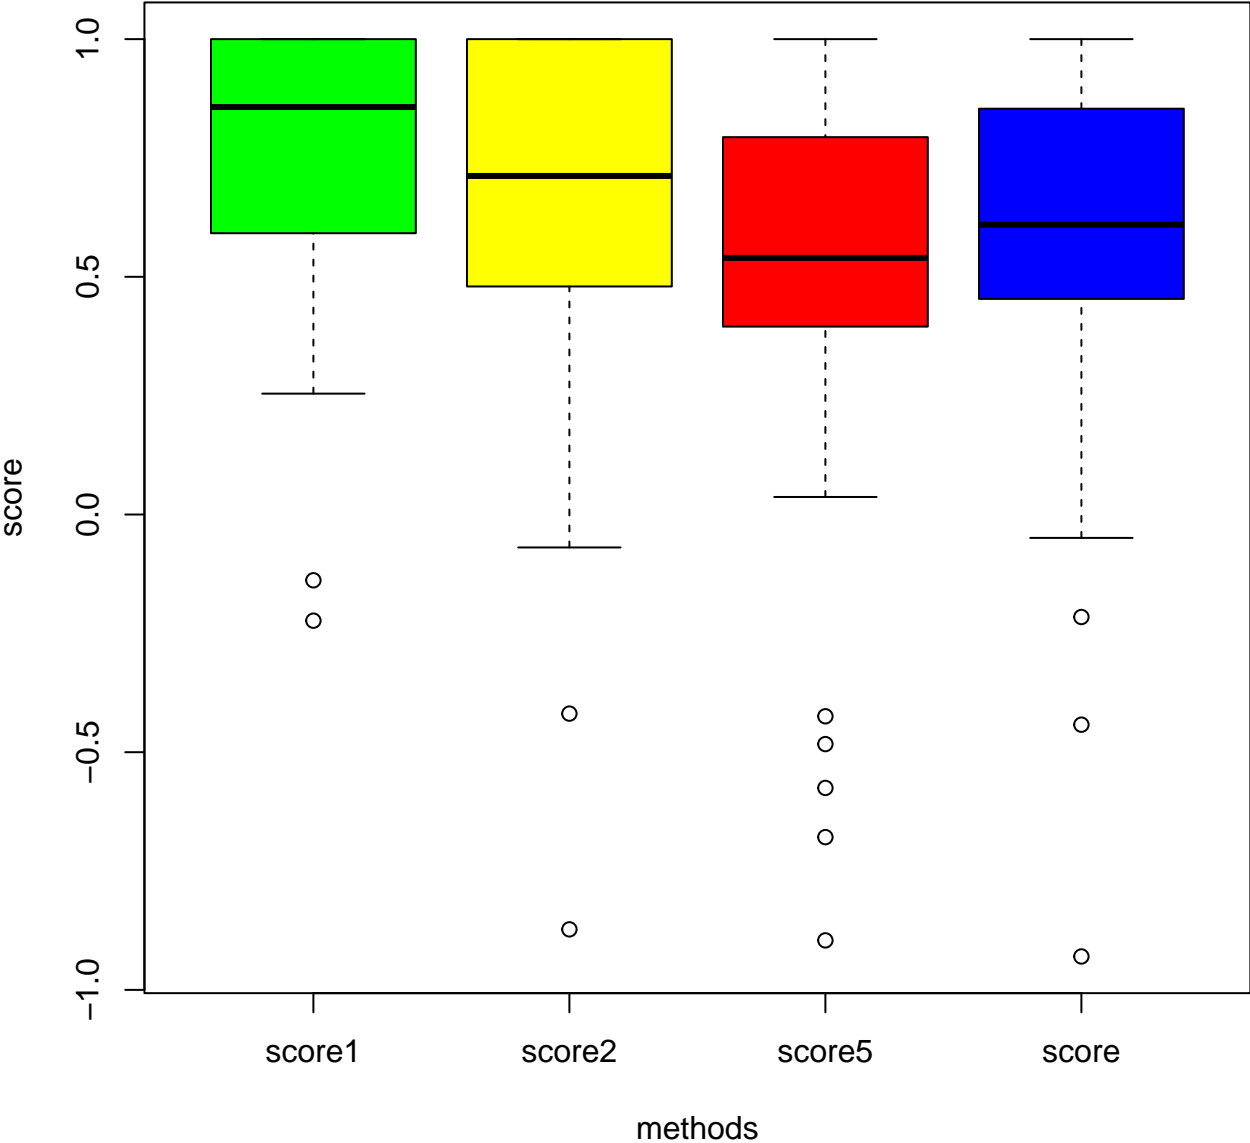

Supplement: s1 [file s1]

# lung small cell carcinoma\_stability analysis

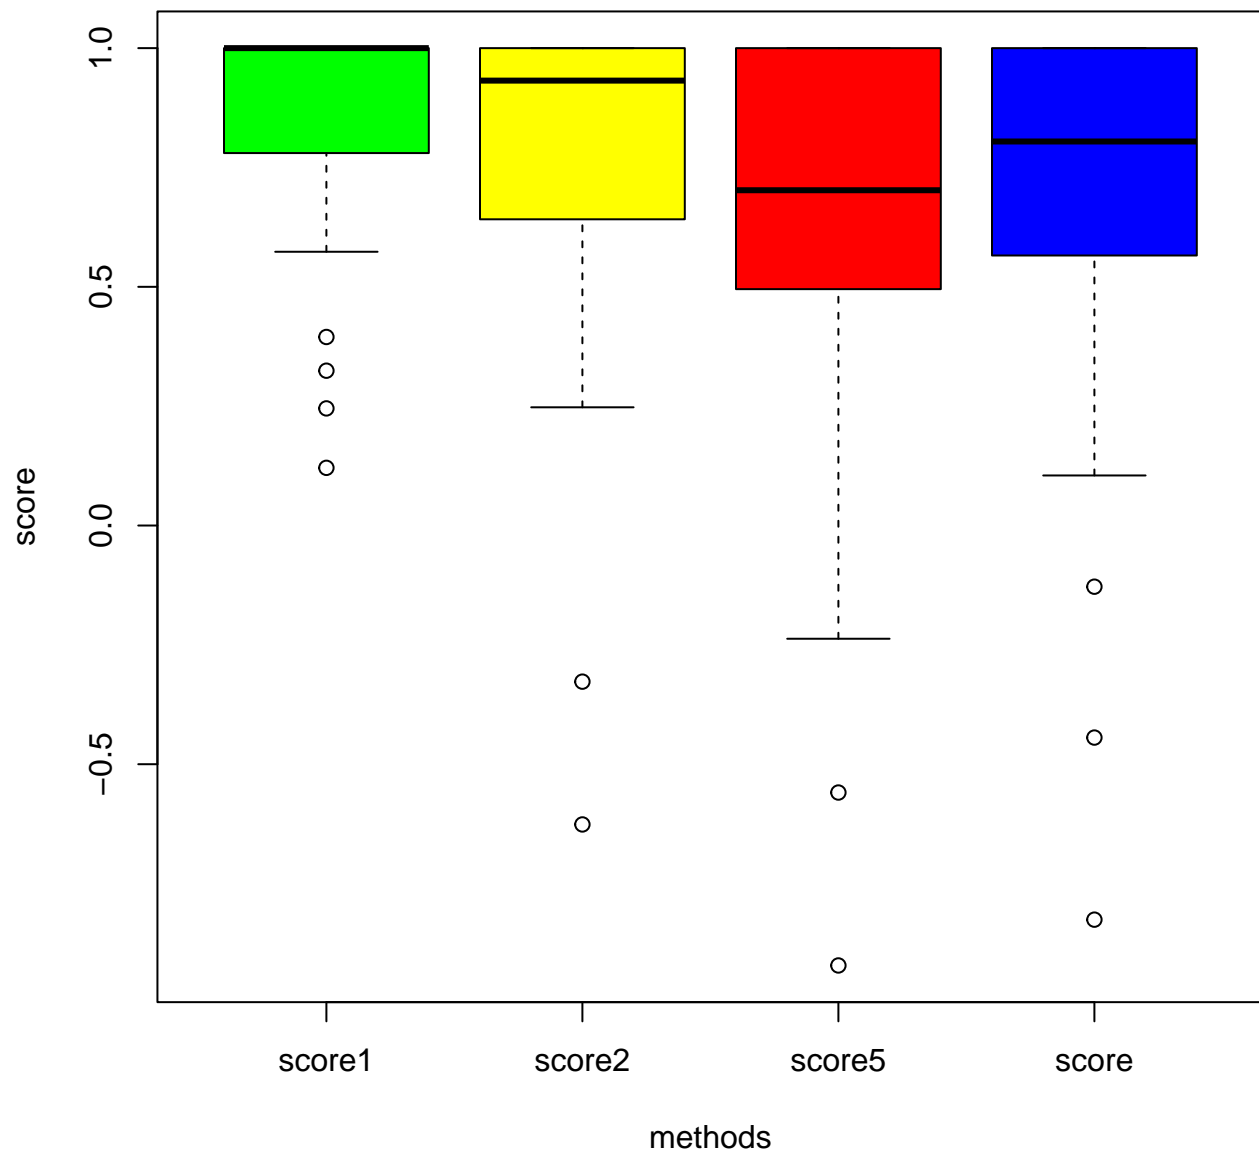

Supplement: s1 [file s1]

# malignant mesothelioma\_stability analysis

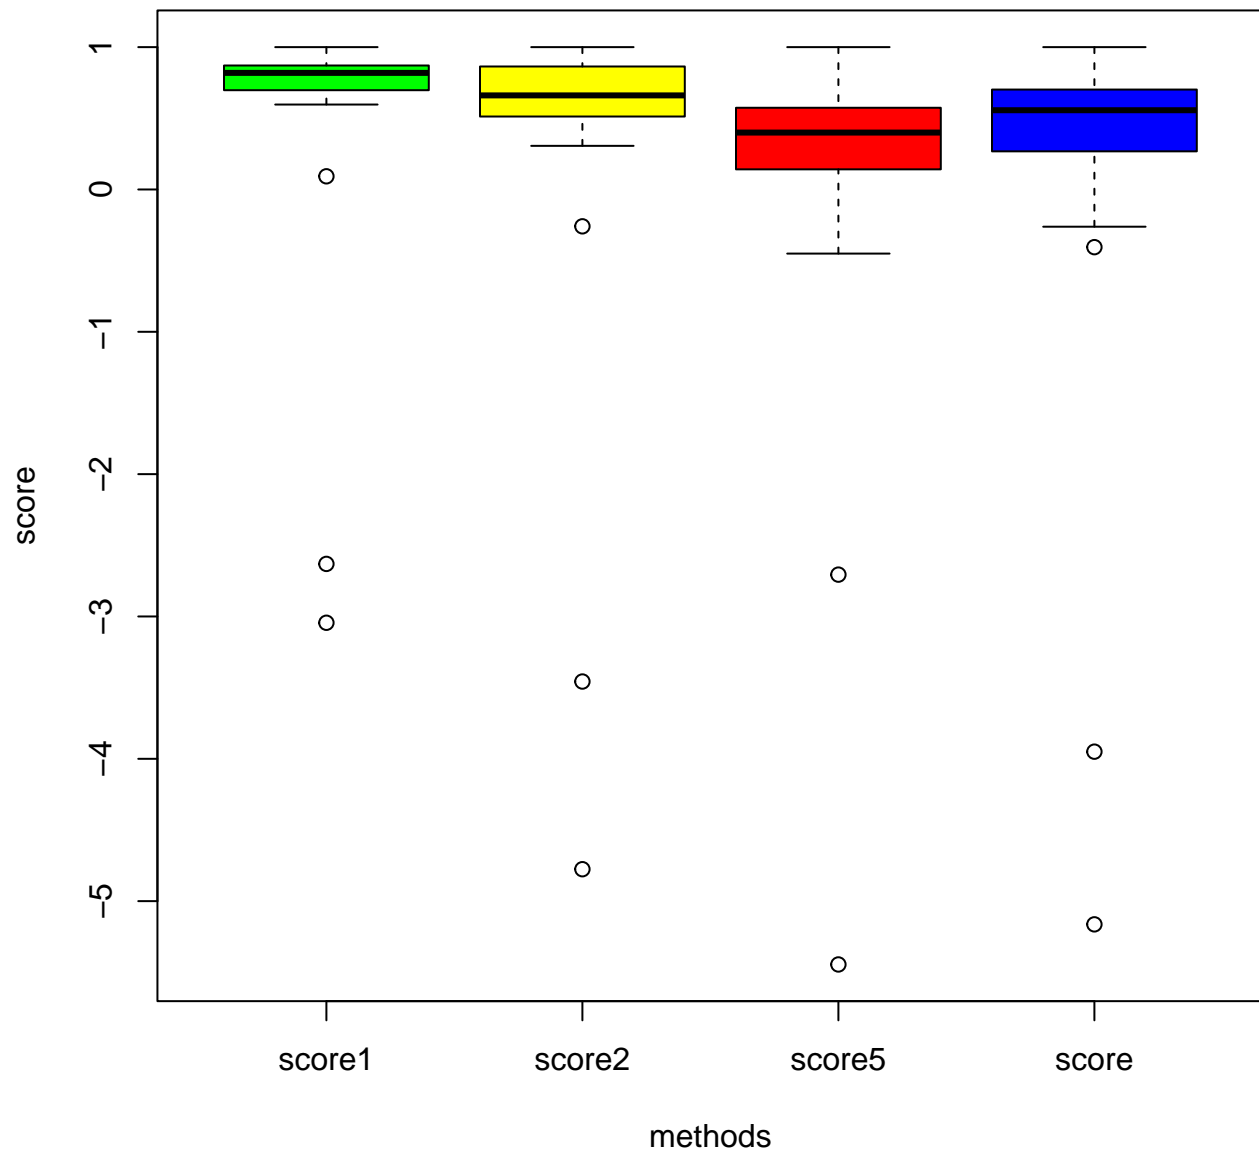

Supplement: s1 [file s1]

# bronchiolo-alveolar adenocarcinoma\_stability analysis

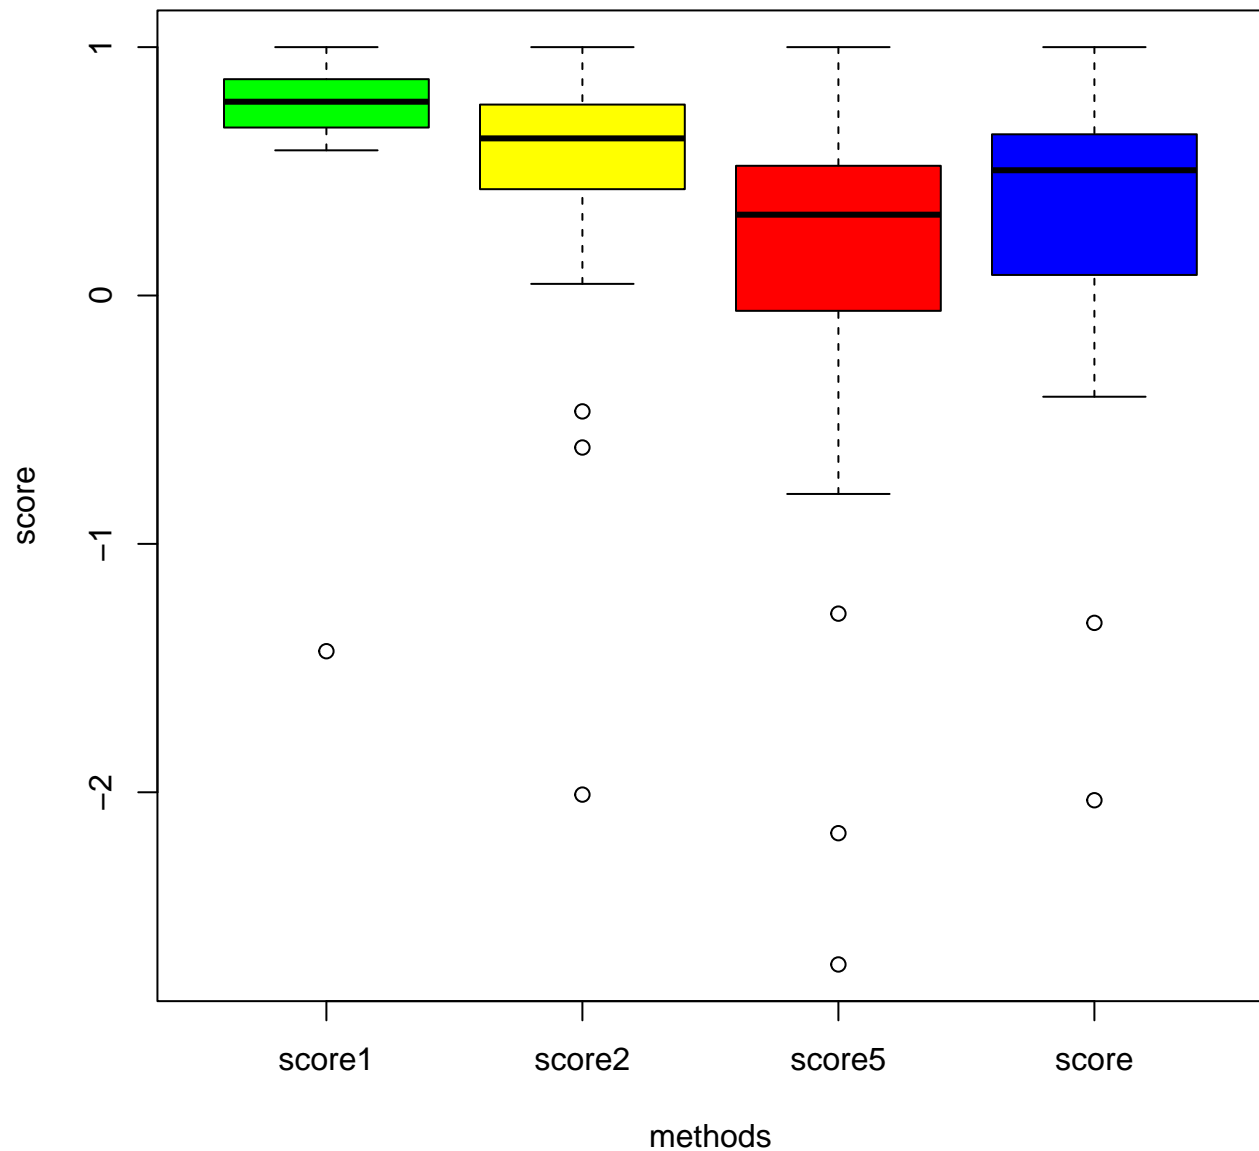

Supplement: s1 [file s1]

# head and neck cancer\_stability analysis

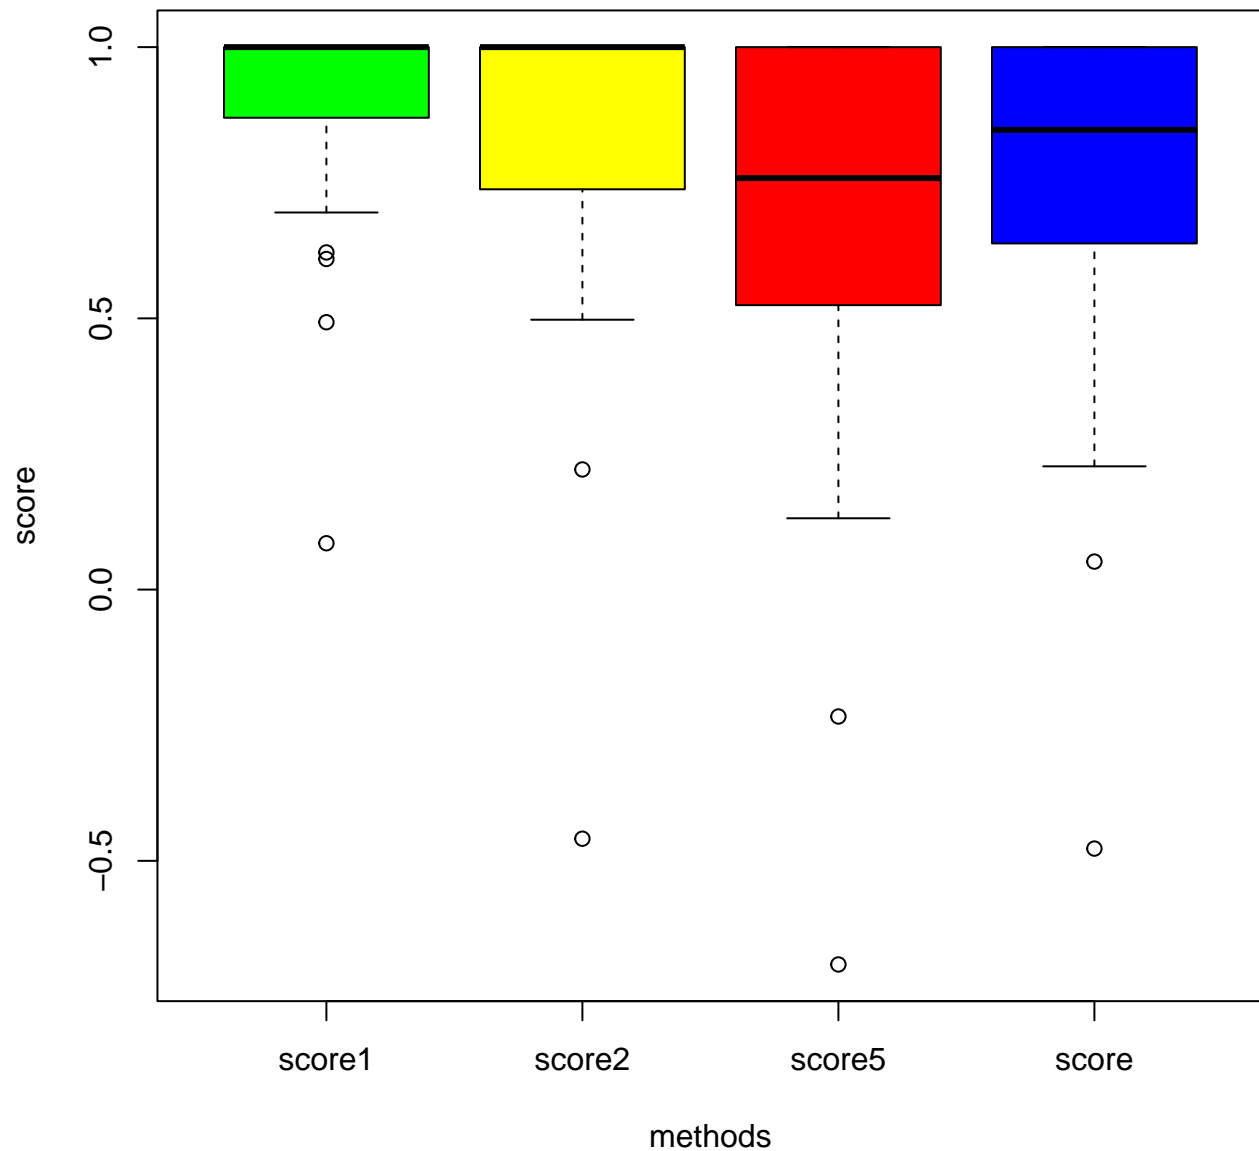

Supplement: s1 [file s1]

# tongue cancer\_stability analysis

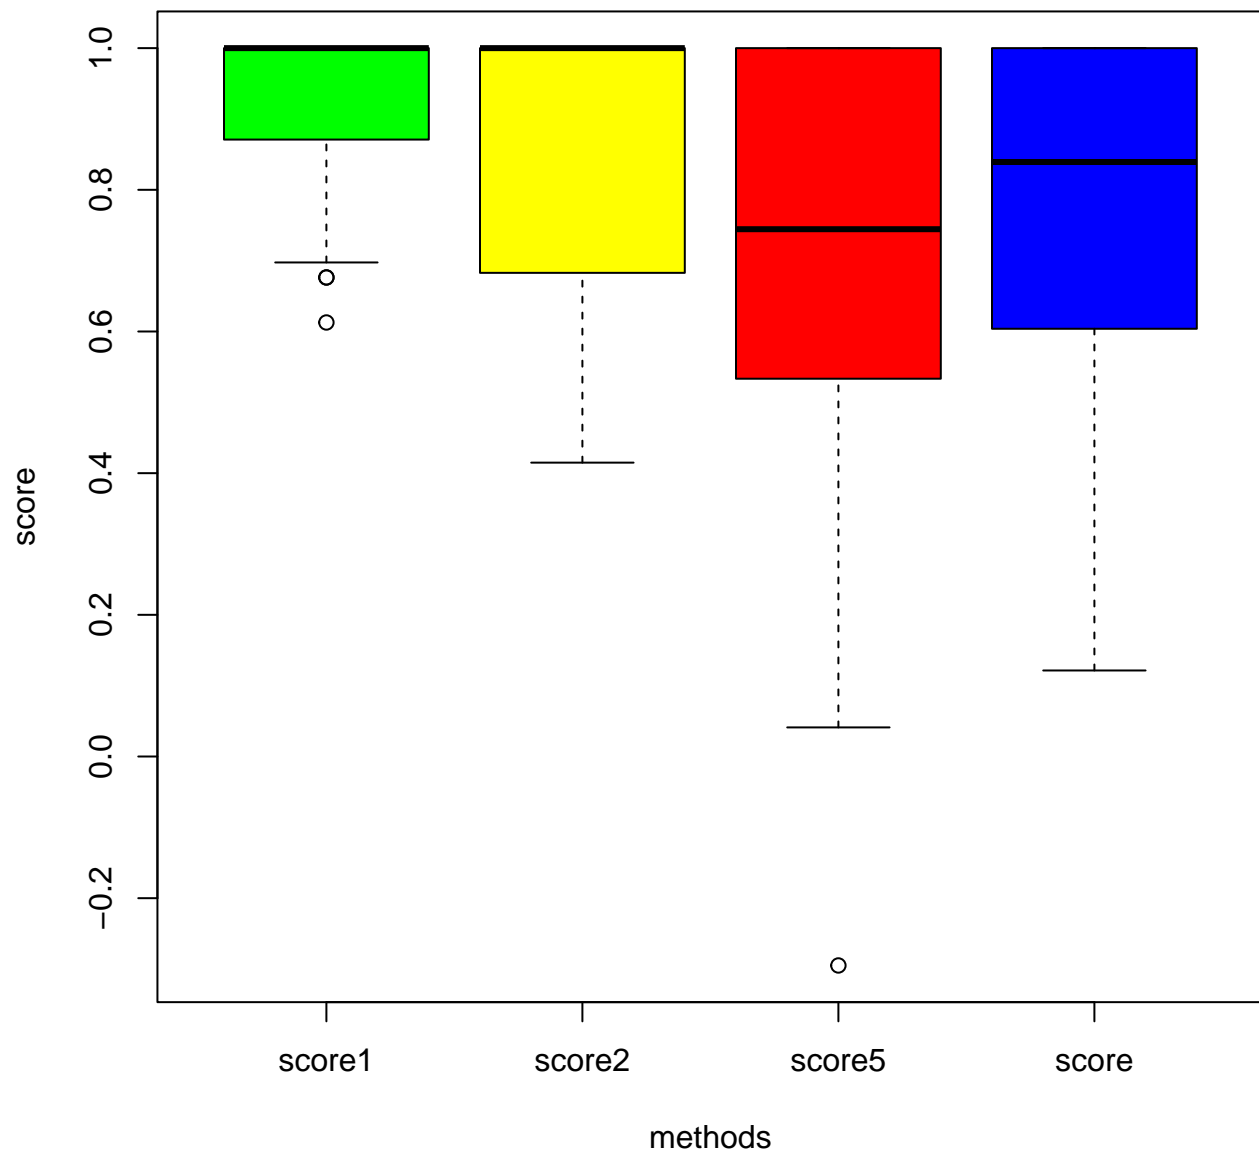

Supplement: s1 [file s1]

# carotid stenosis\_stability analysis

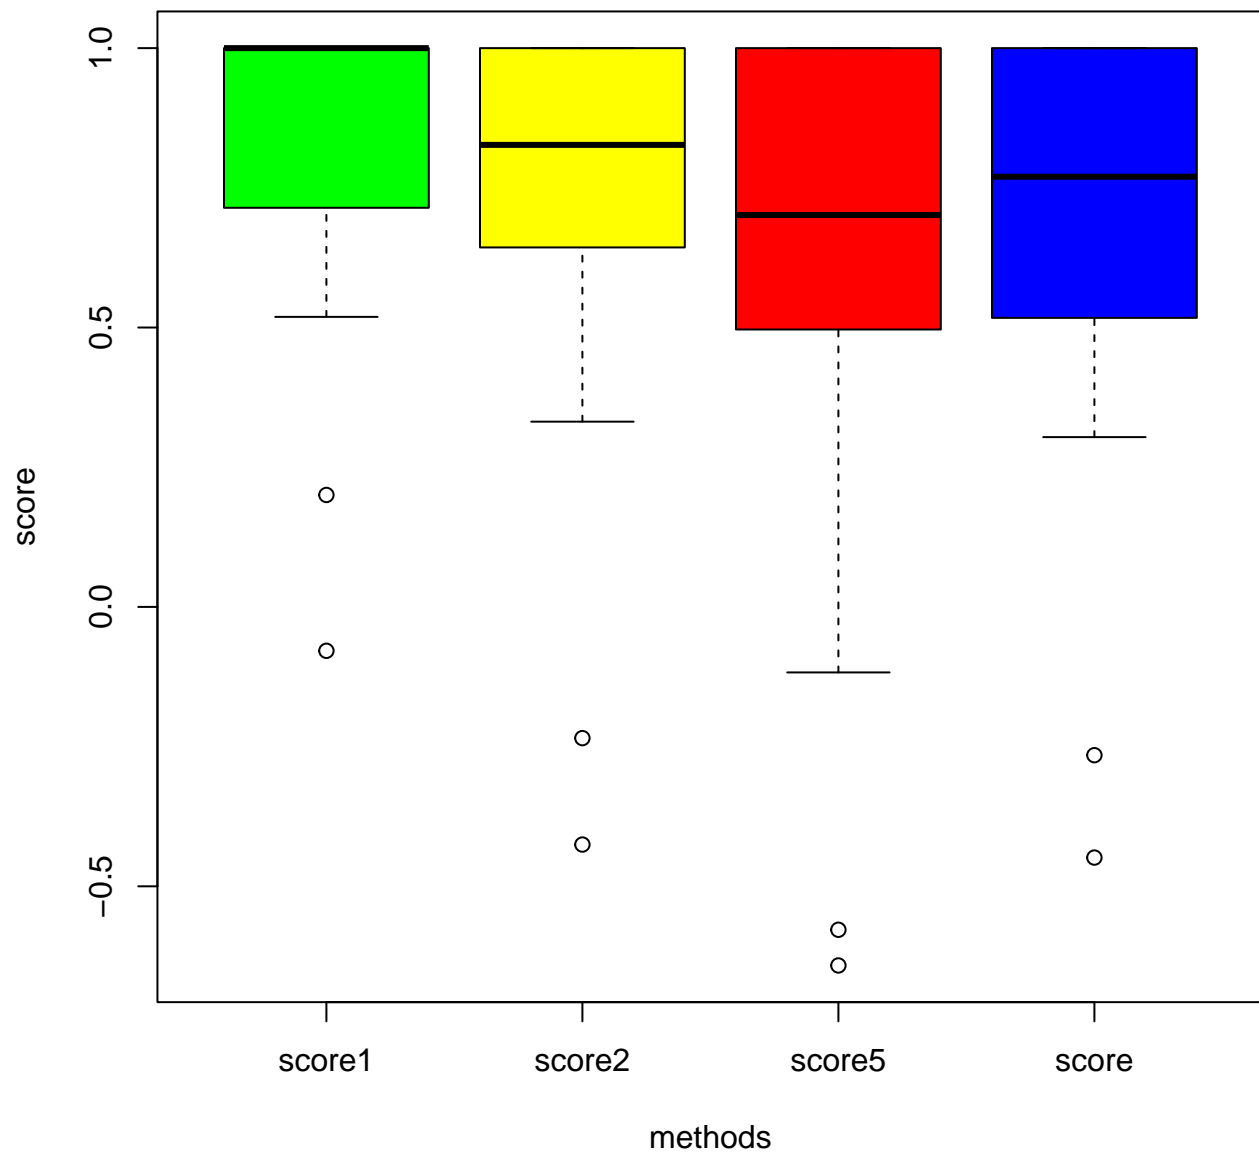

Supplement: s1 [file s1]

# uveal melanoma\_stability analysis

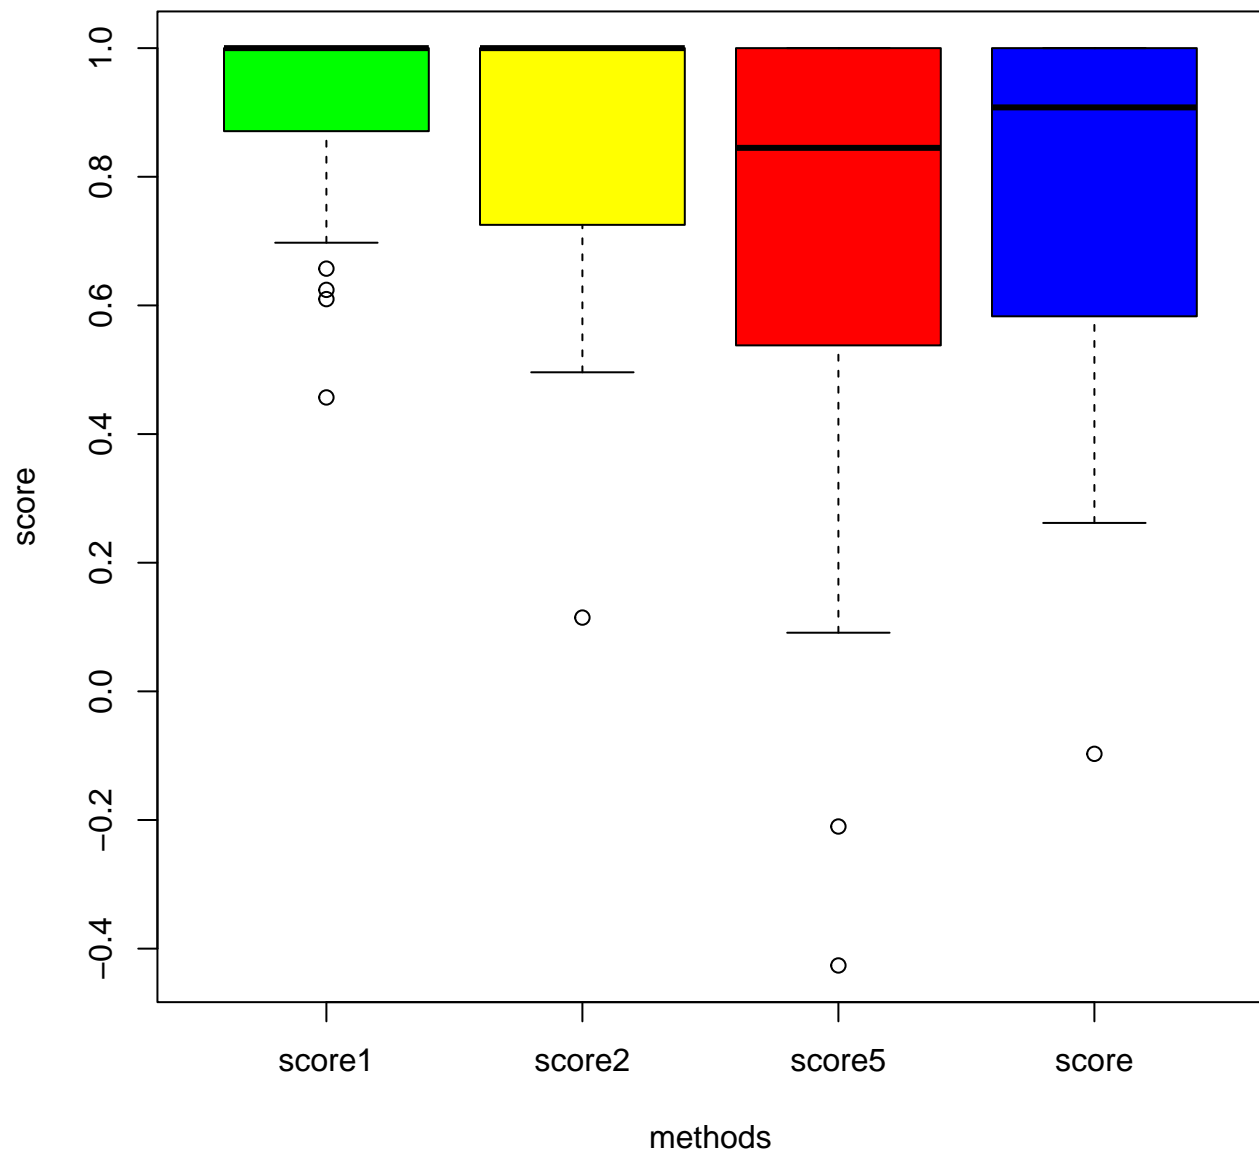

Supplement: s1 [file s1]

# essential hypertension\_stability analysis

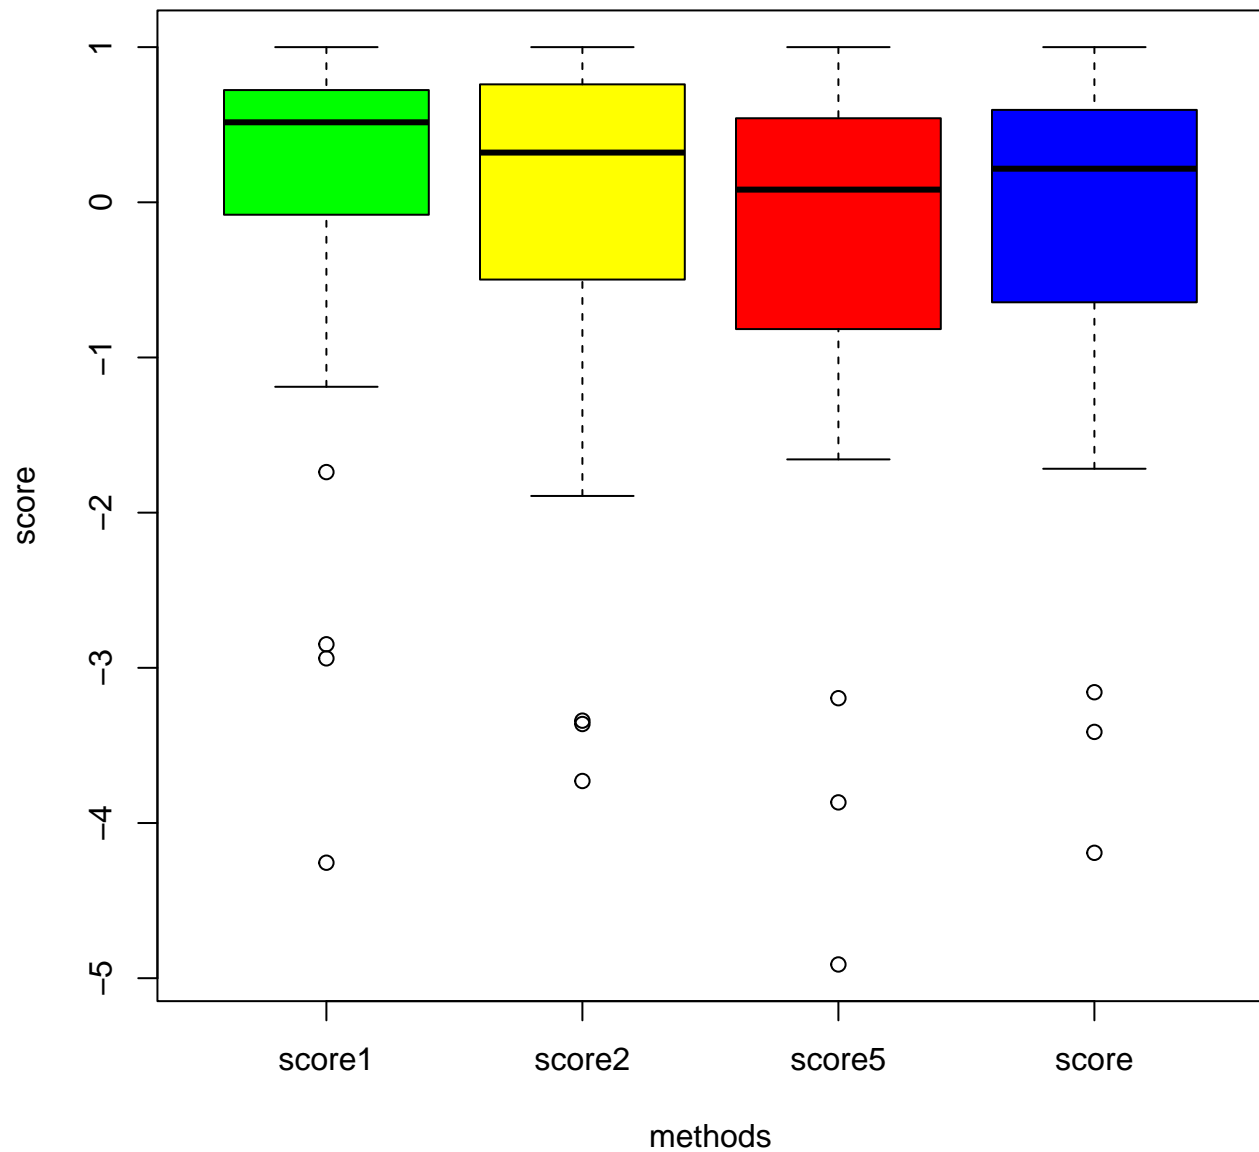

Supplement: s1 [file s1]

# cerebral infarction\_stability analysis

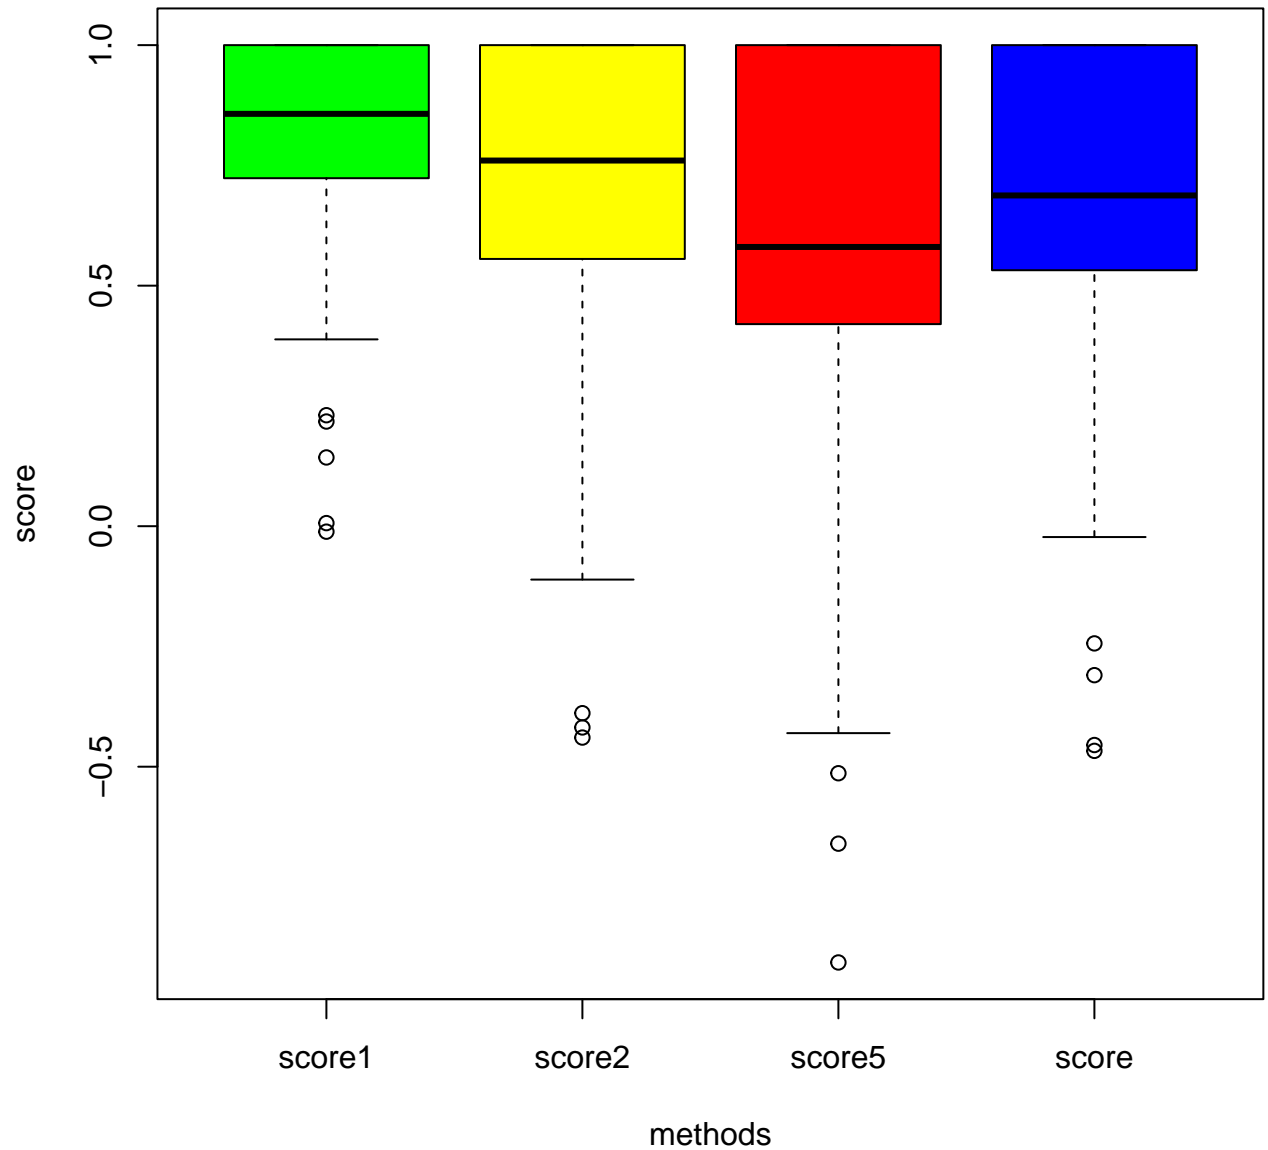

Supplement: s1 [file s1]

# skin benign neoplasm\_stability analysis

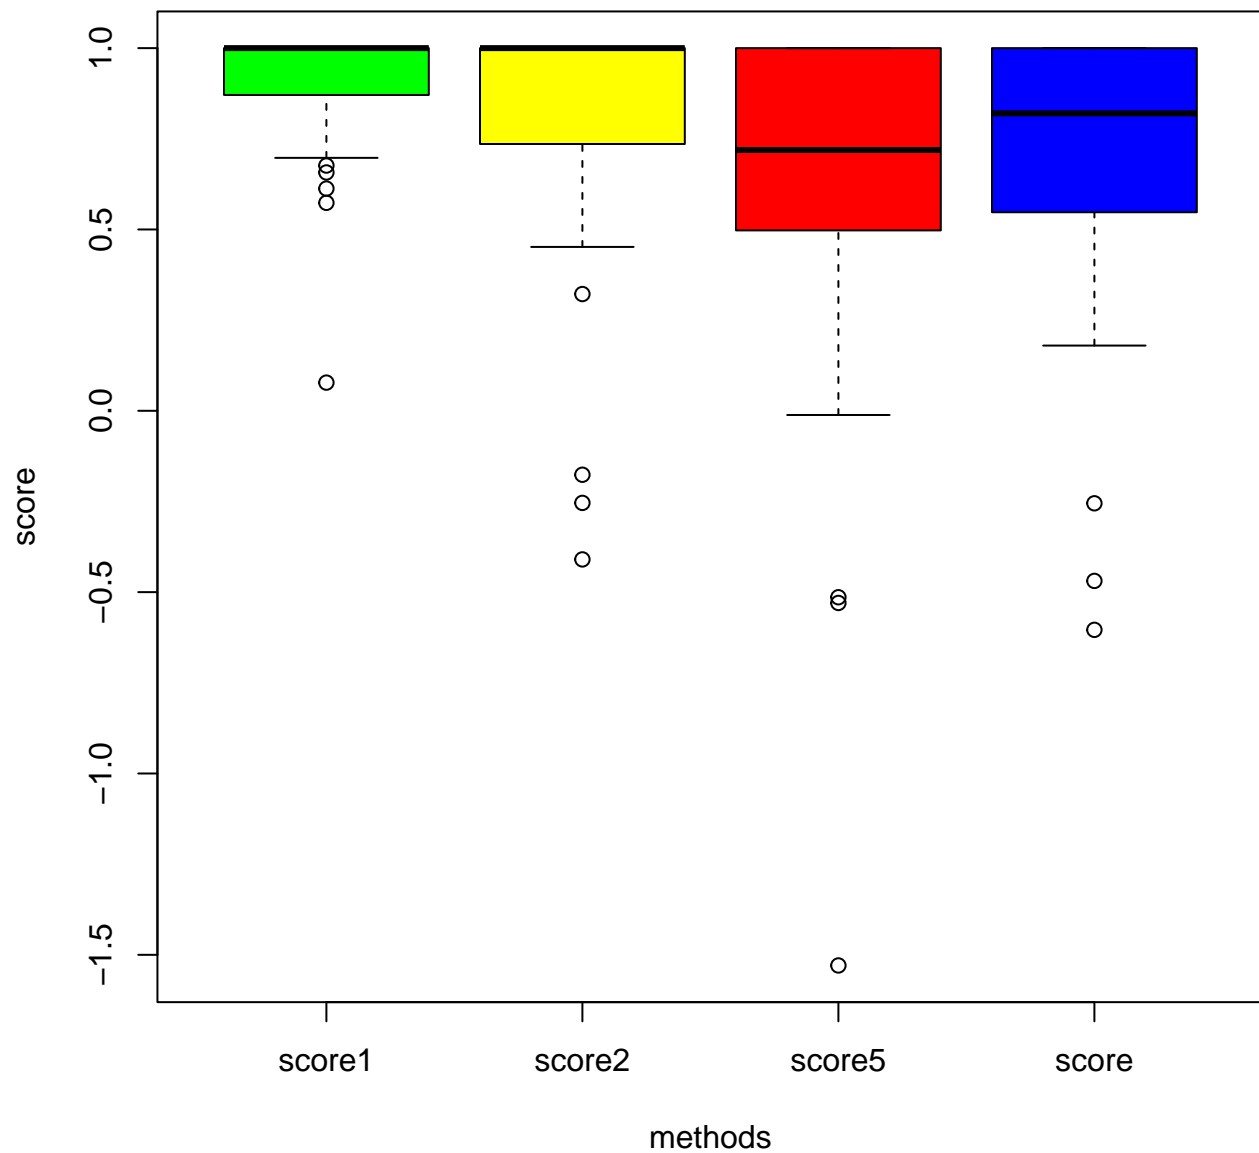

Supplement: s1 [file s1]

# erythromelalgia\_stability analysis

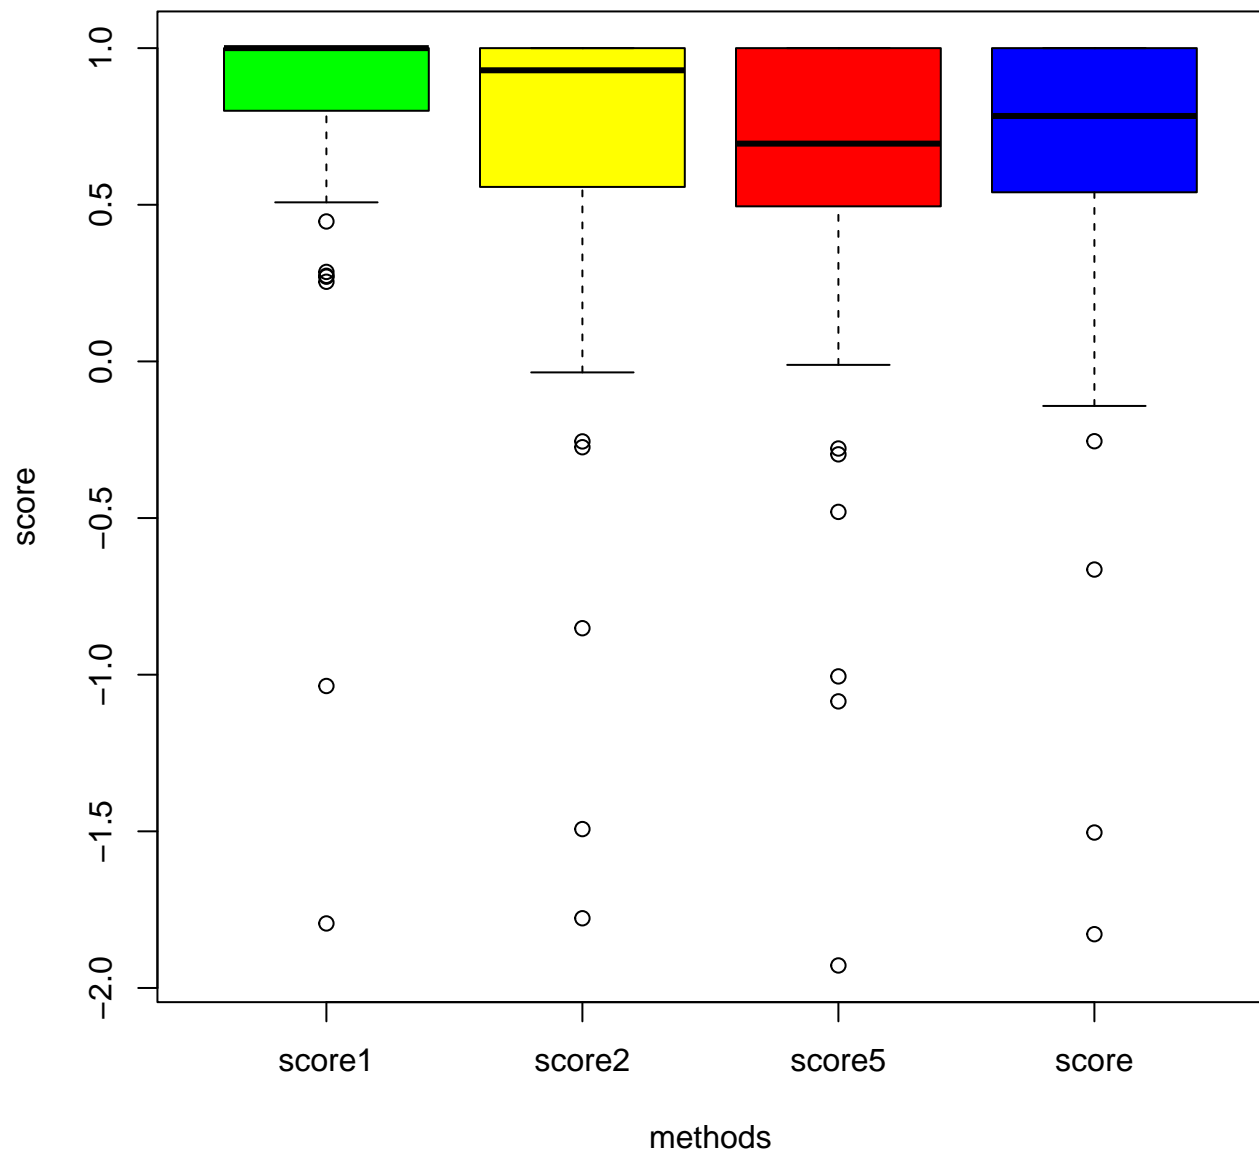

Supplement: s1 [file s1]

# angioedema\_stability analysis

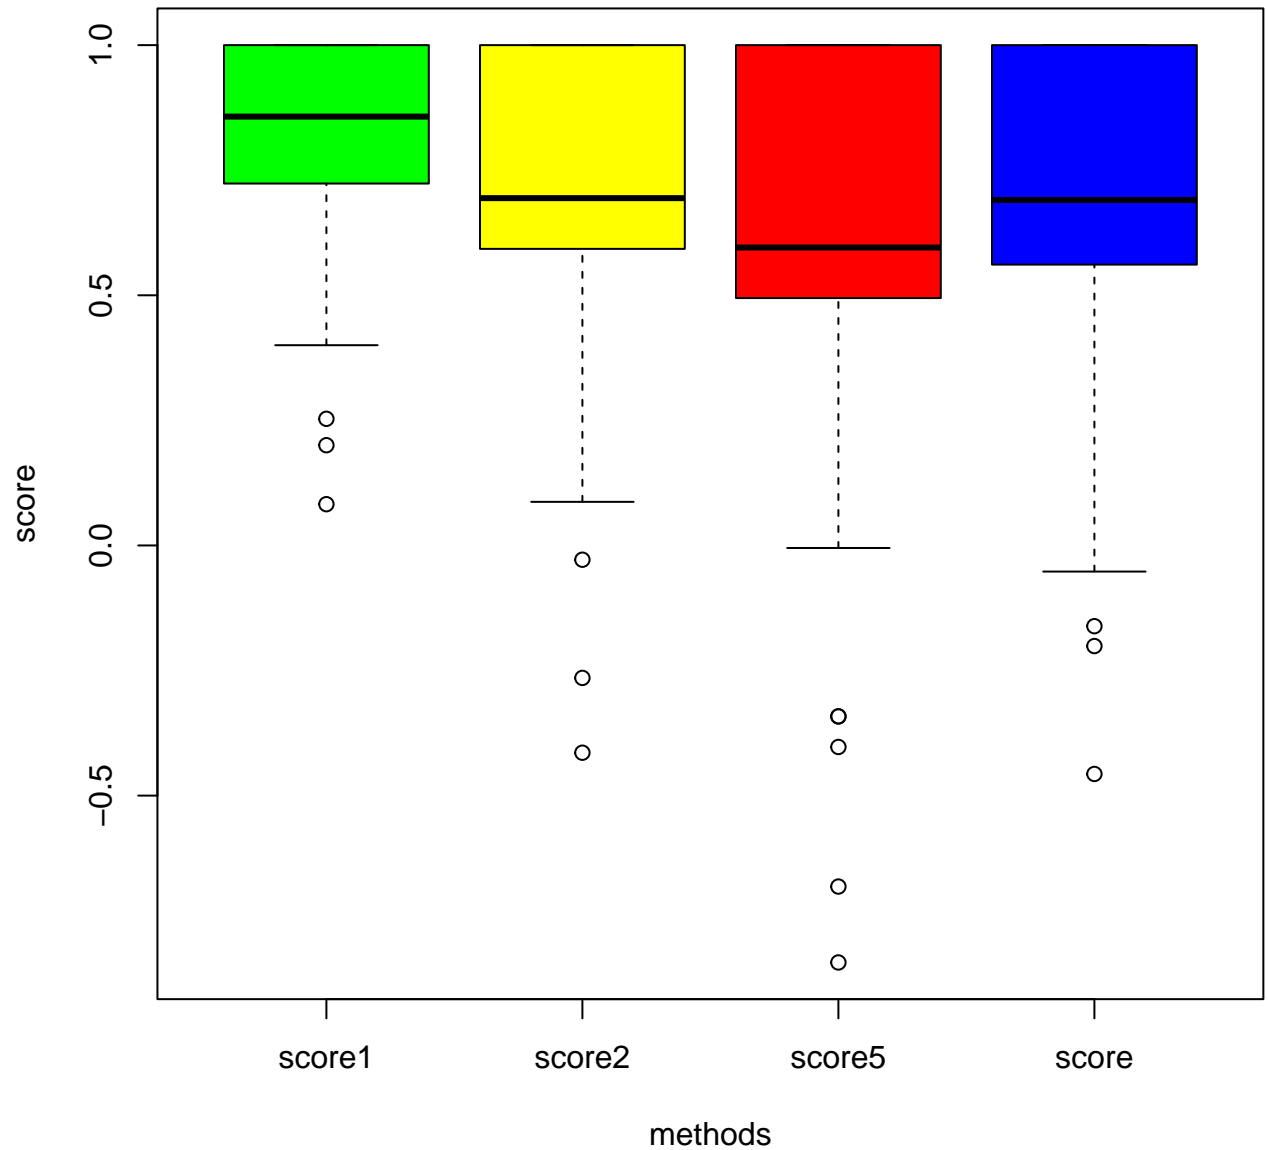

Supplement: s1 [file s1]

# familial retinoblastoma\_stability analysis

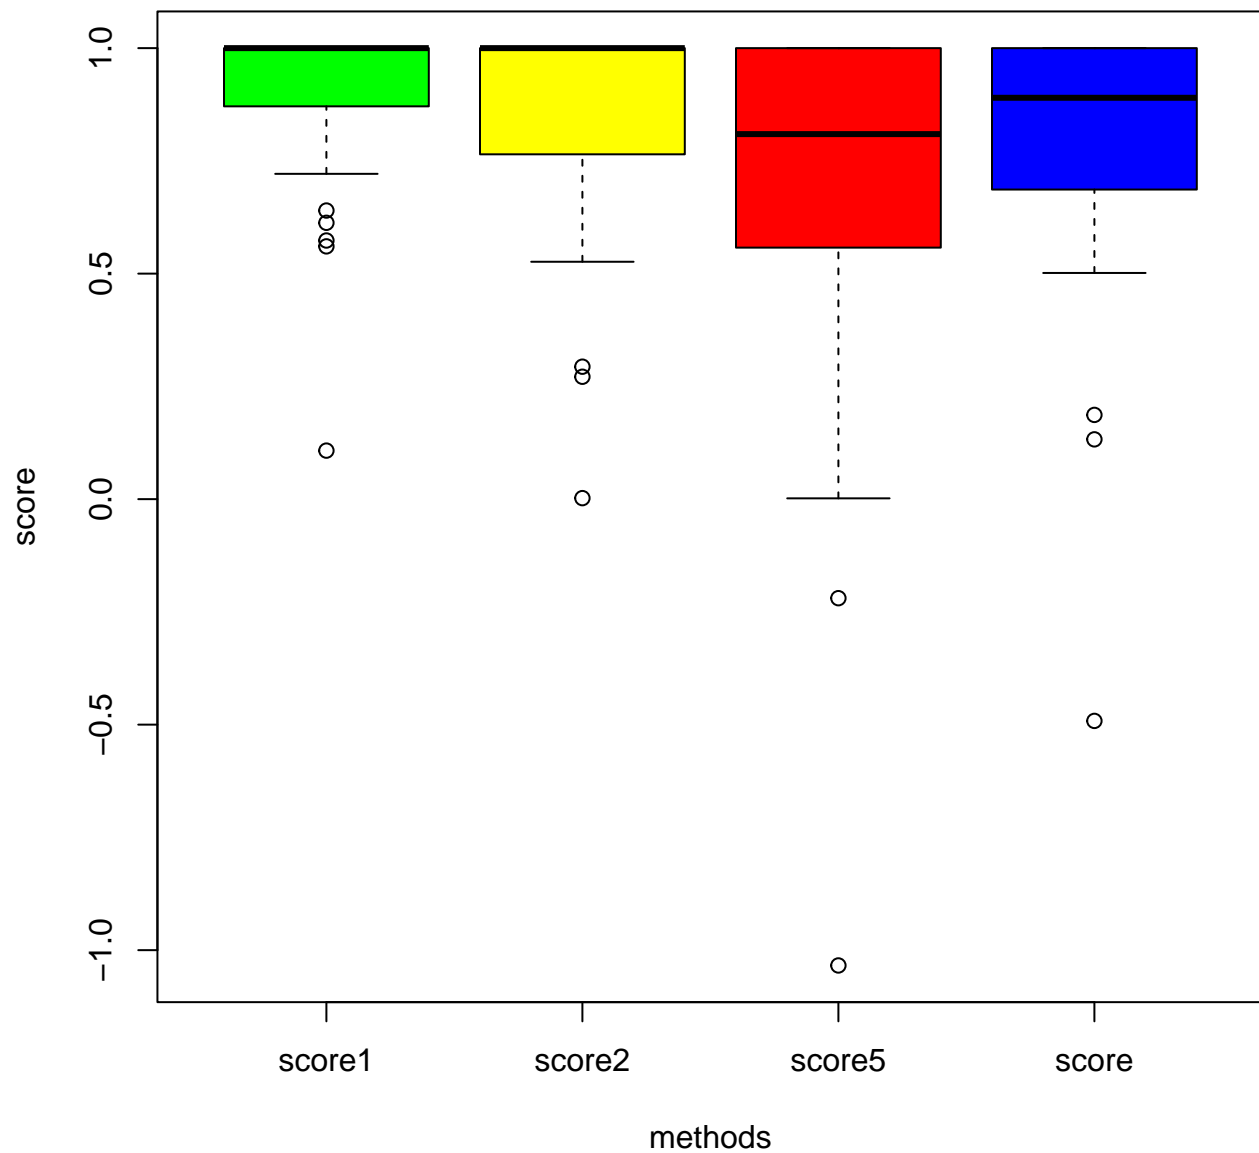

Supplement: s1 [file s1]

# vasculitis\_stability analysis

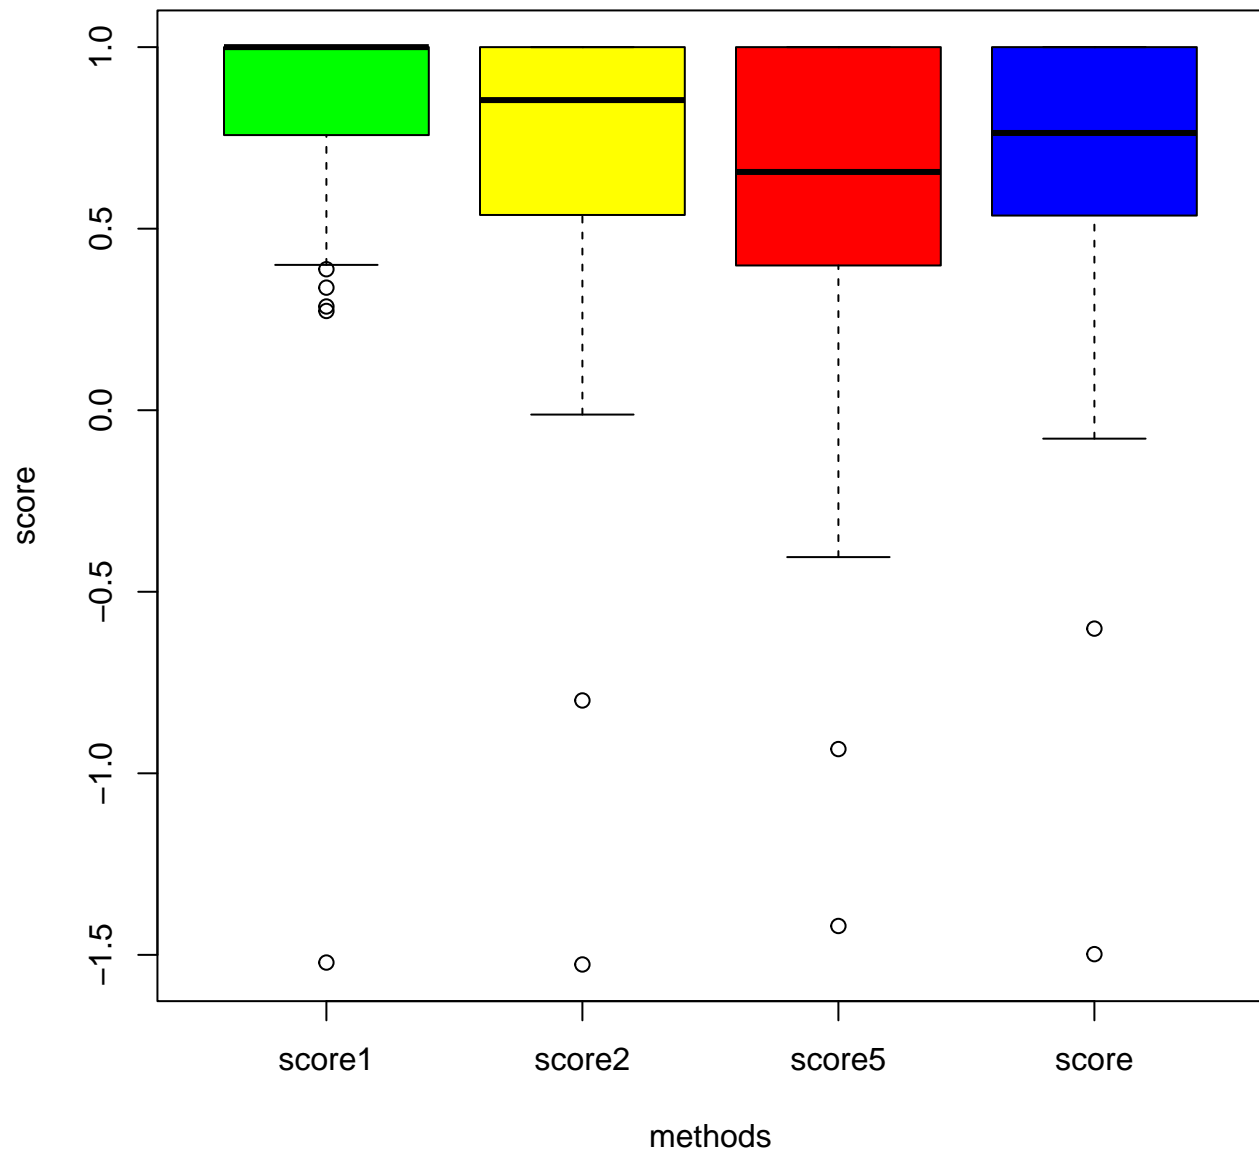

Supplement: s1 [file s1]

# hereditary angioedema\_stability analysis

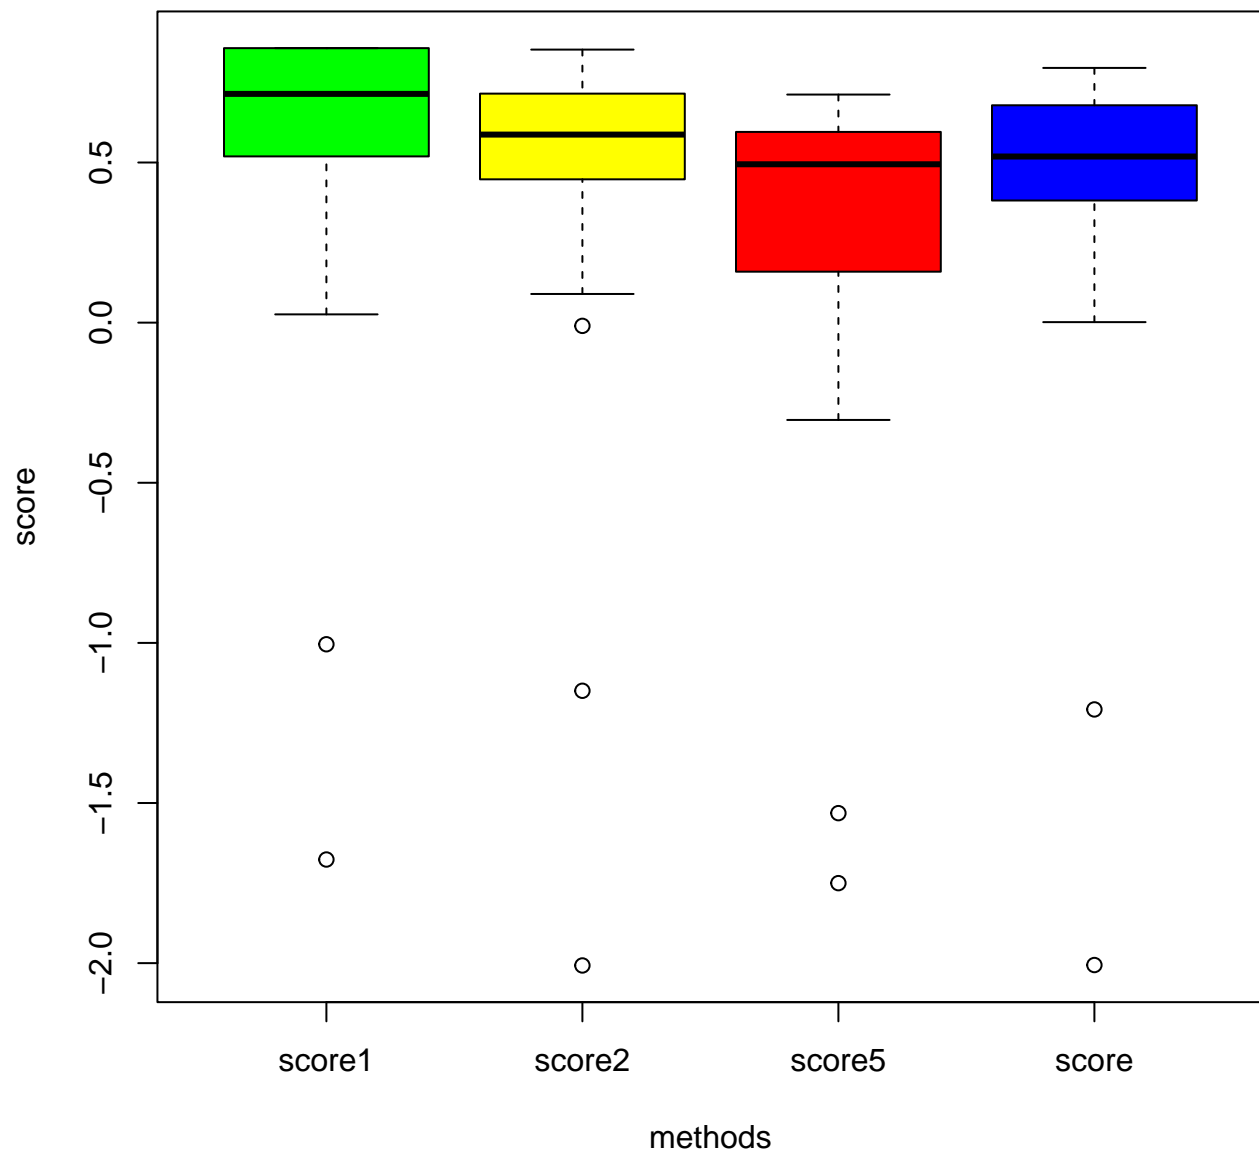

Supplement: s1 [file s1]

# coronary aneurysm\_stability analysis

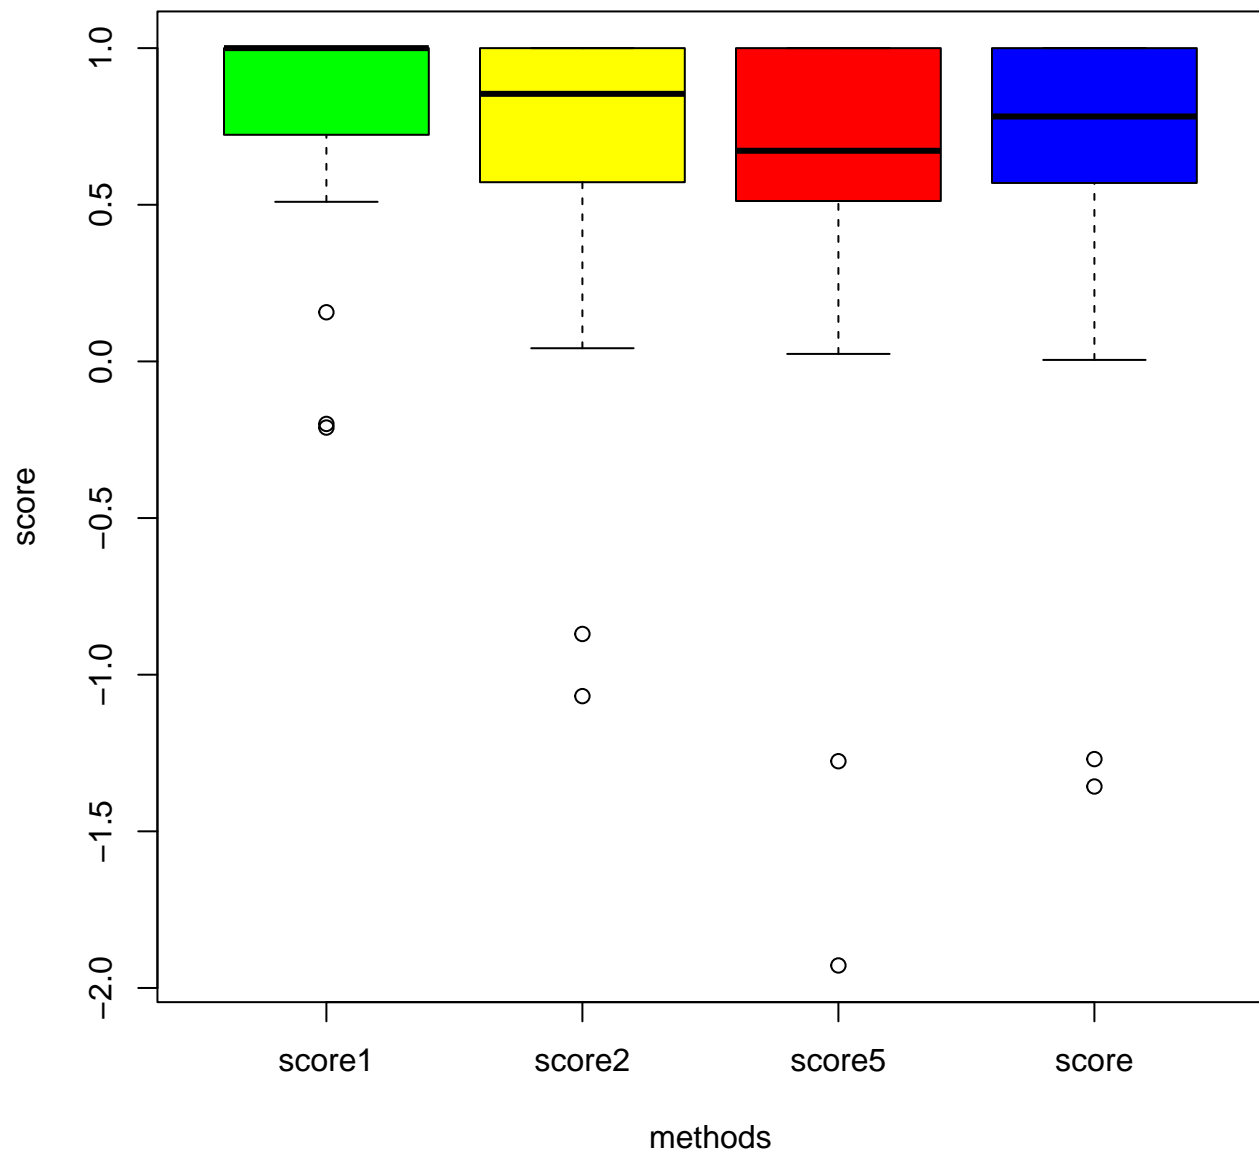

Supplement: s1 [file s1]

# male breast cancer\_stability analysis

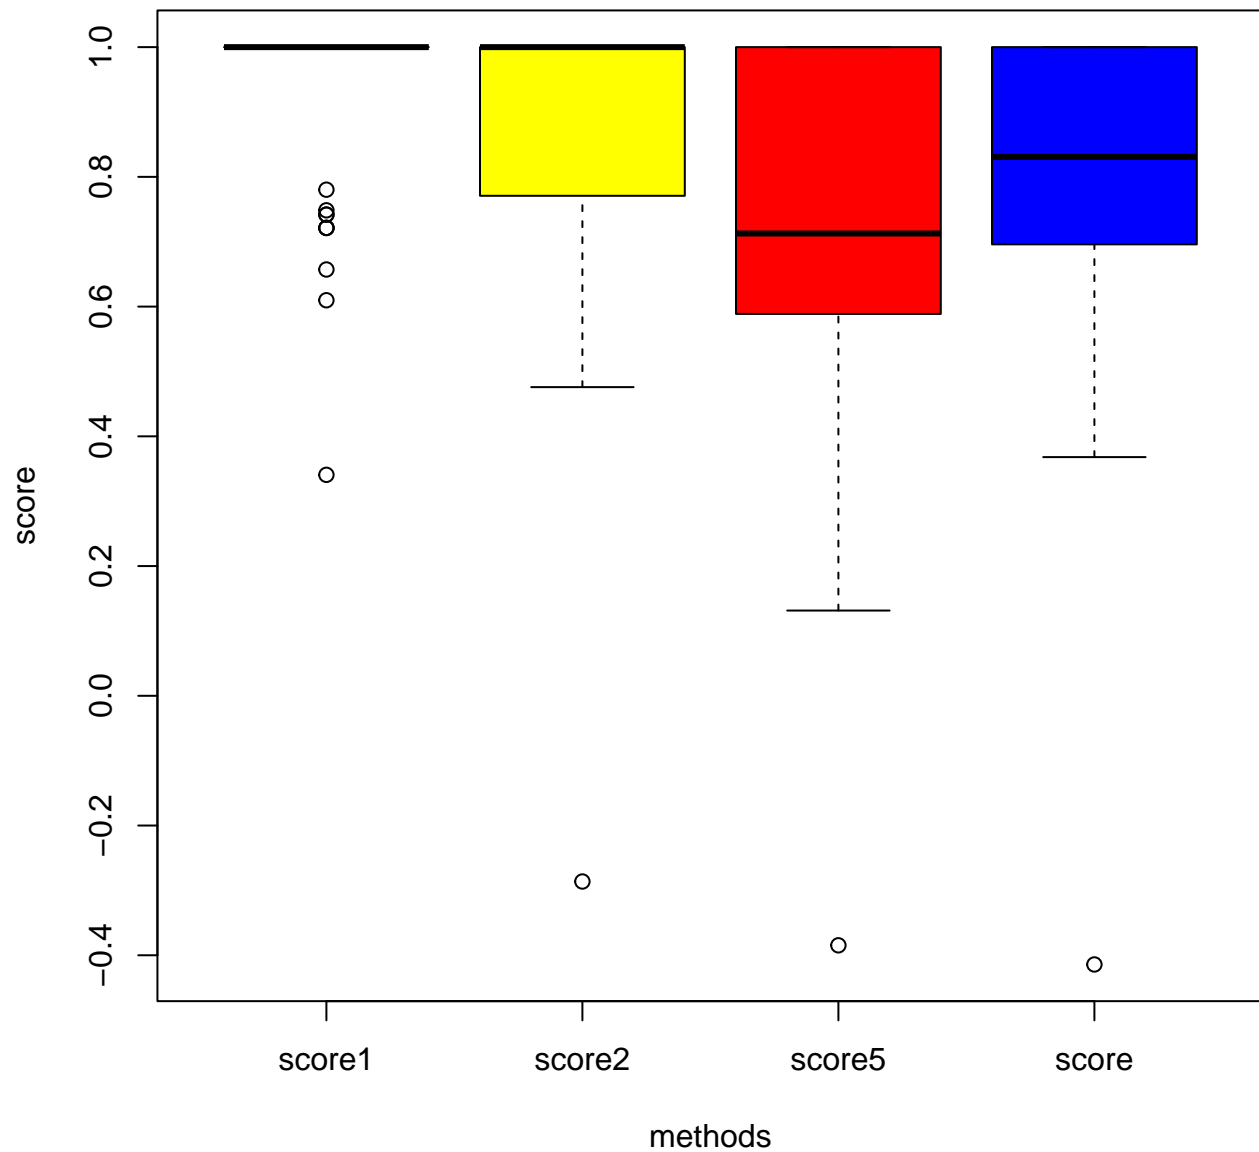

Supplement: s1 [file s1]

# brain ischemia\_stability analysis

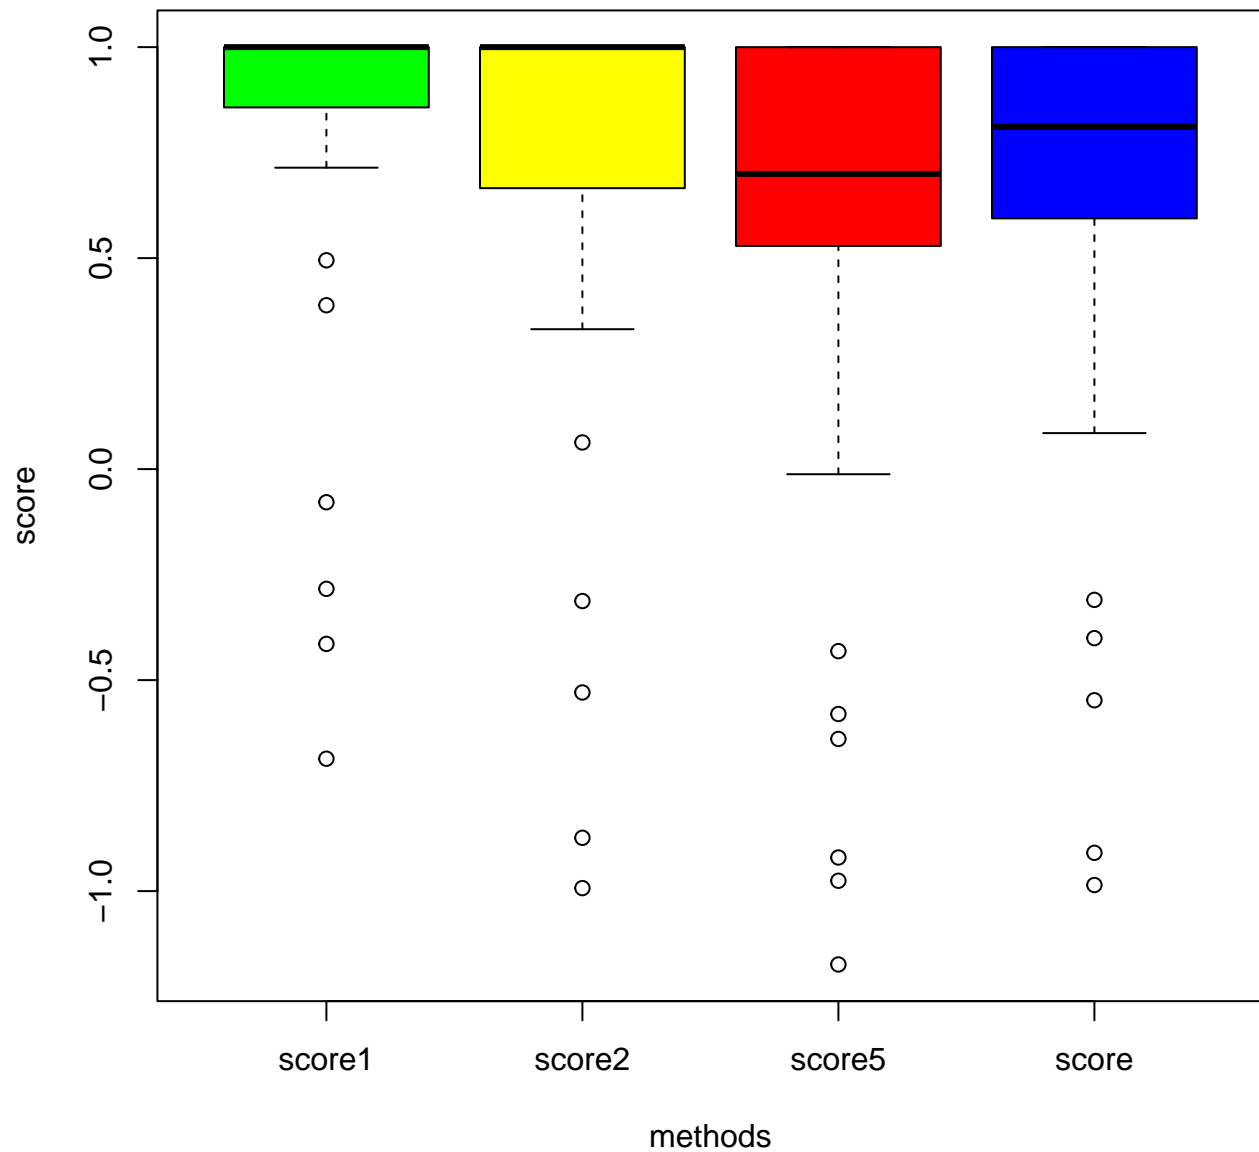

Supplement: s1 [file s1]

# compartment syndrome\_stability analysis

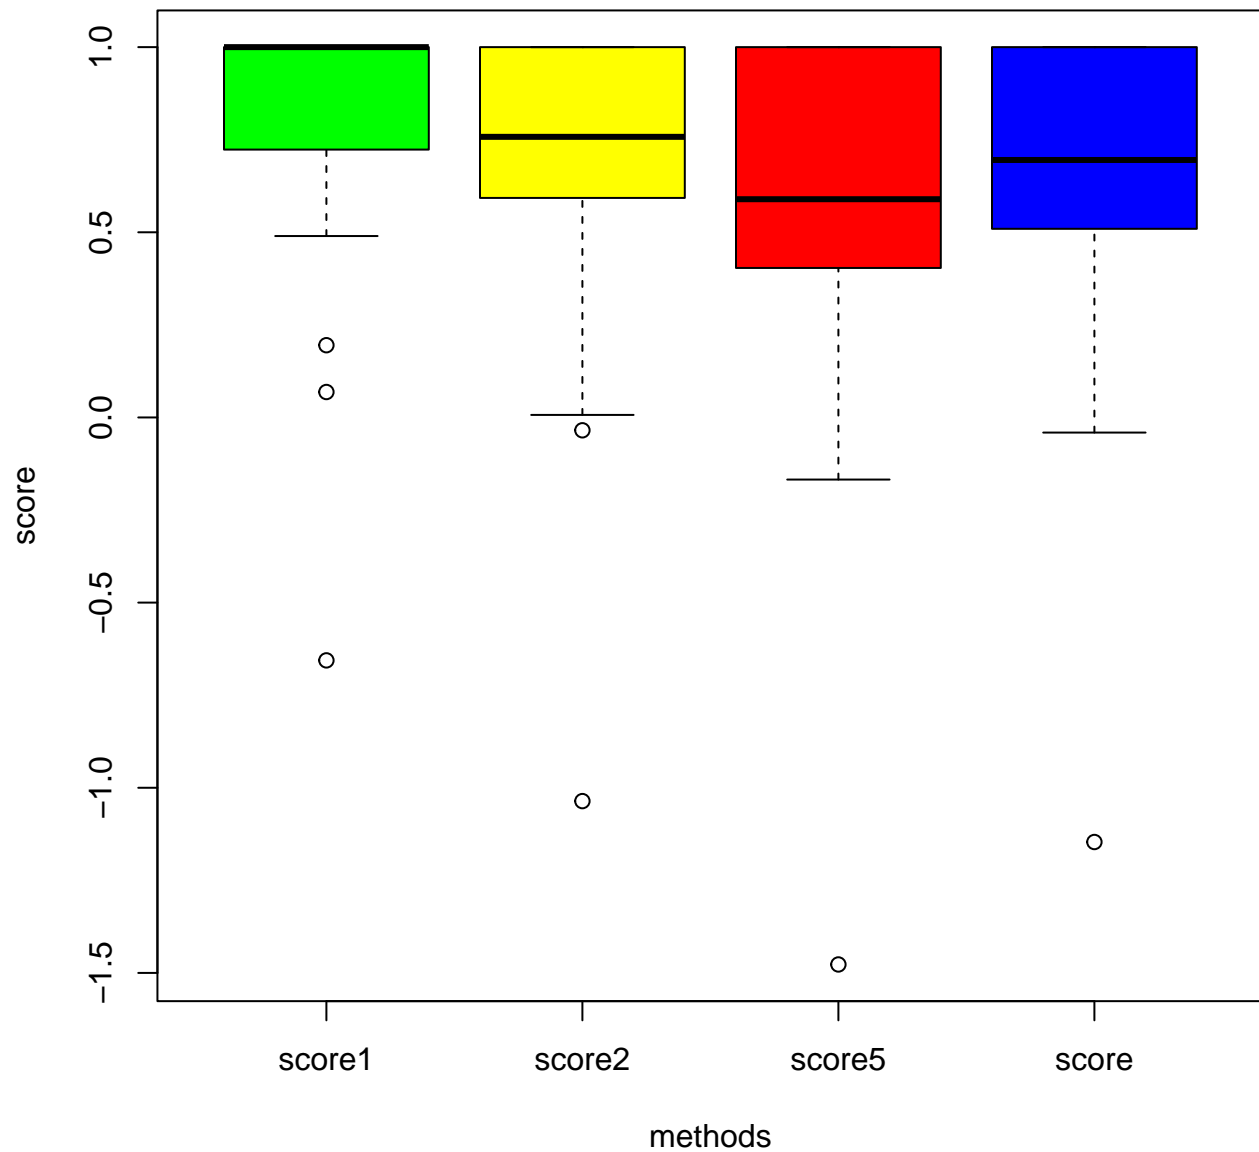

Supplement: s1 [file s1]

# renal hypertension\_stability analysis

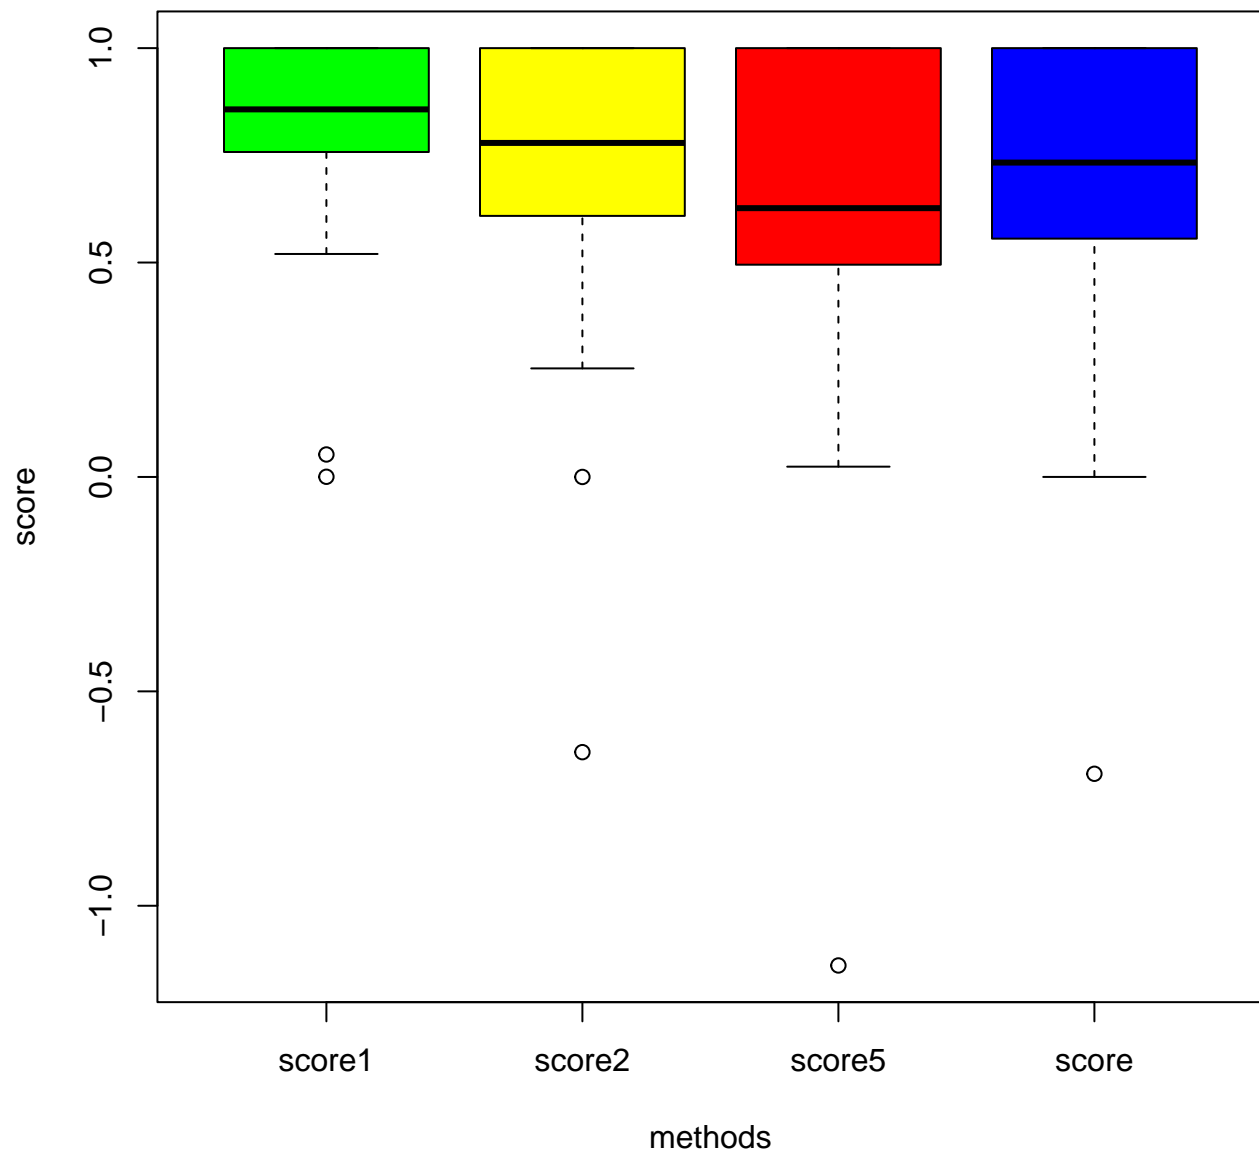

Supplement: s1 [file s1]

# non-small cell lung carcinoma\_stability analysis

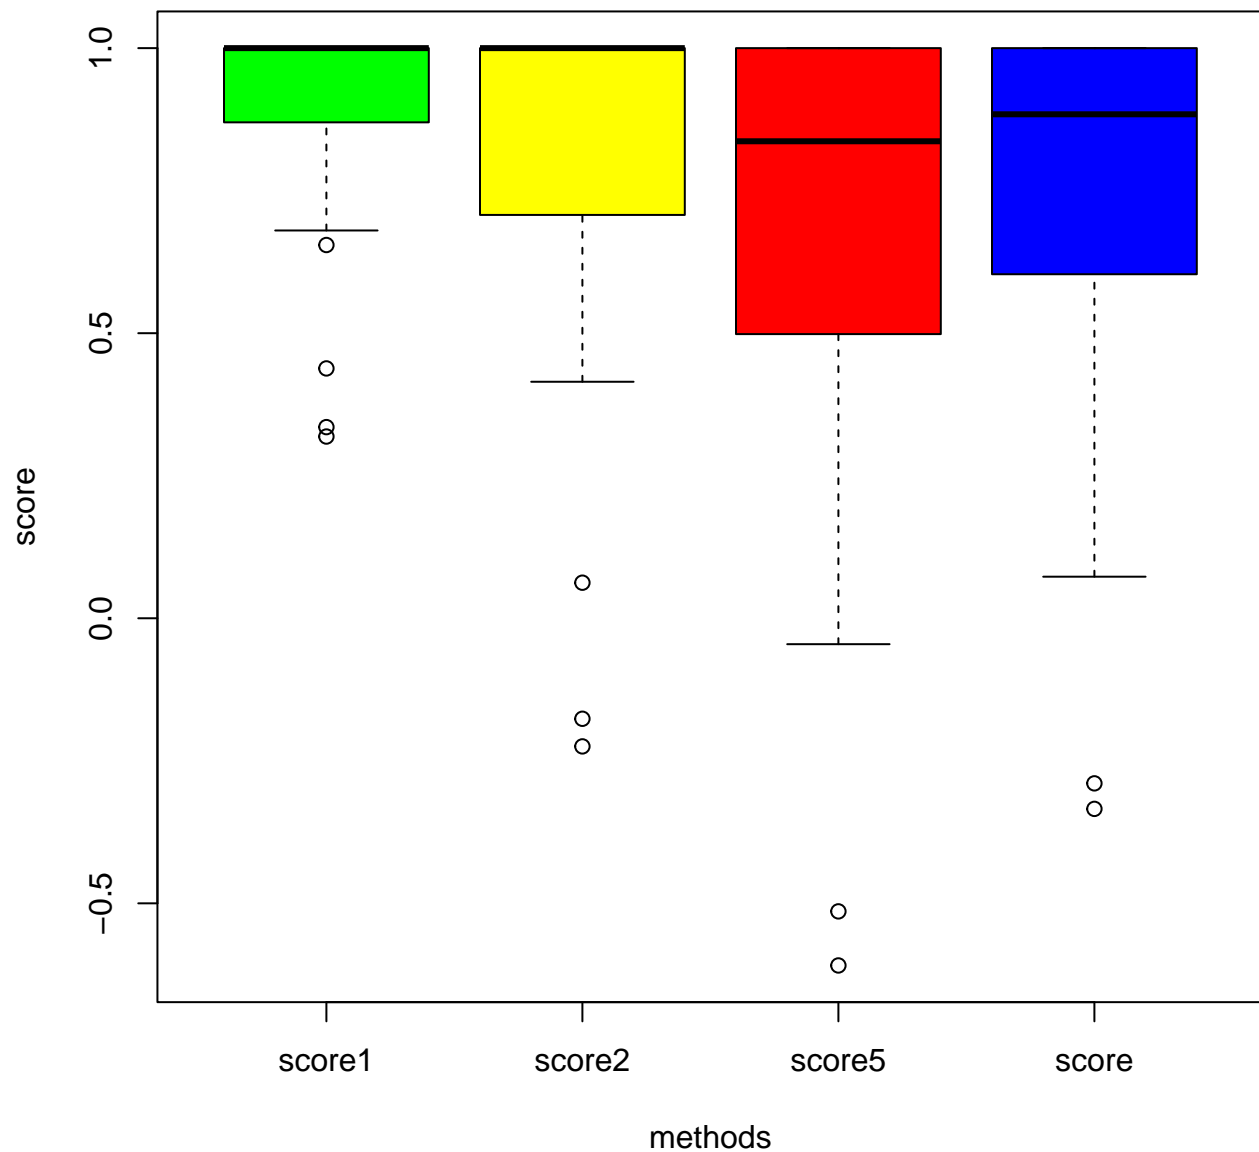

Supplement: s1 [file s1]

## colon cancer\_stability analysis

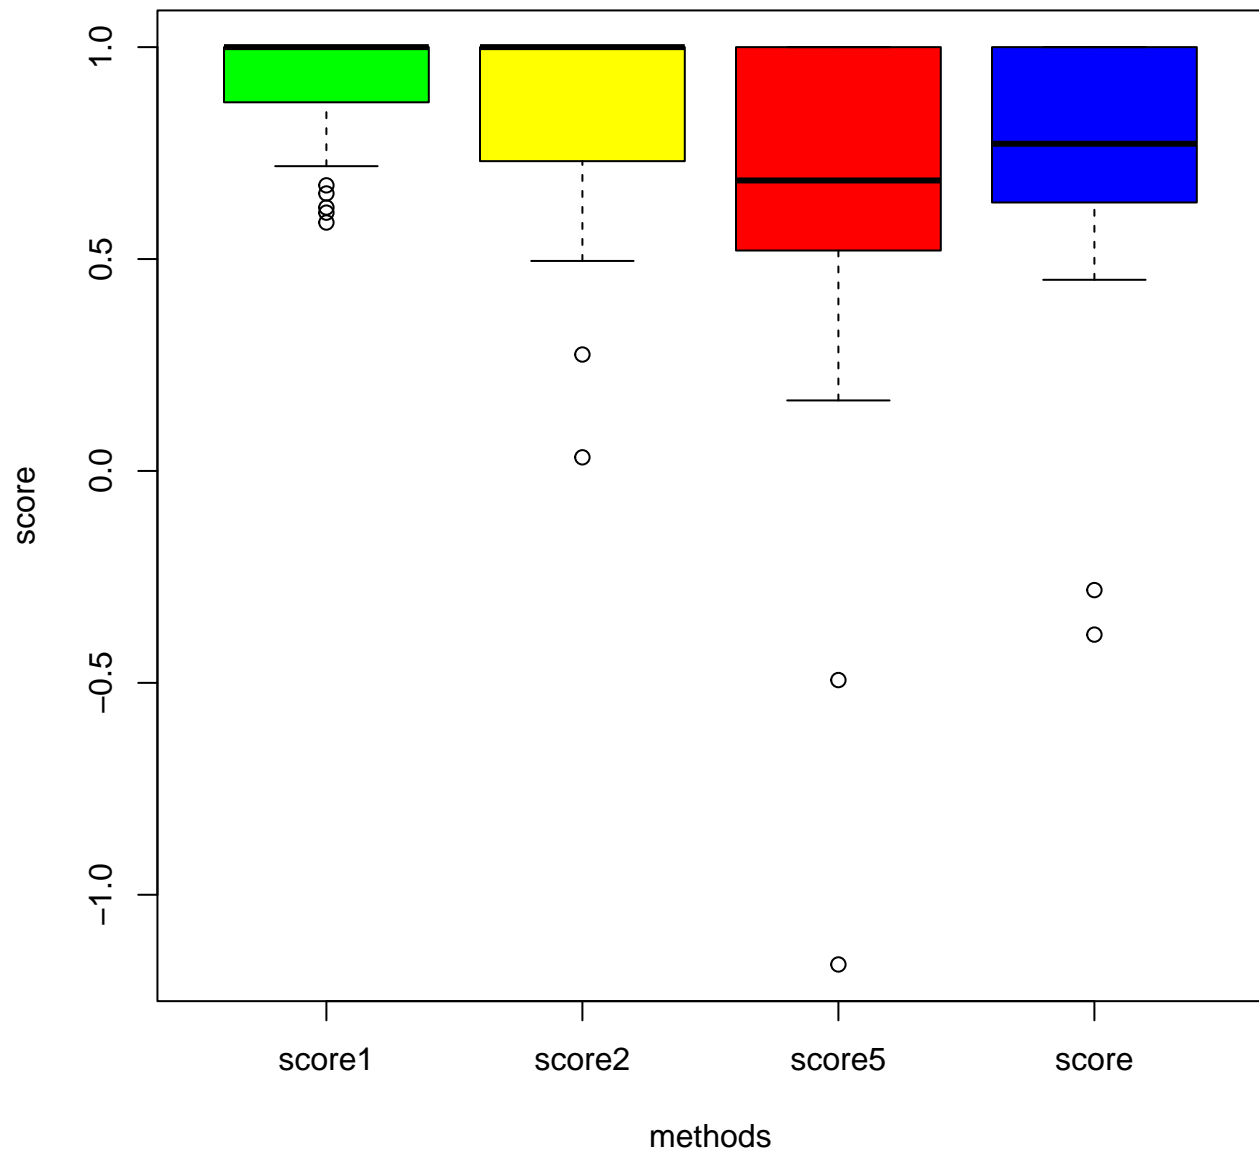

Supplement: s1 [file s1]

# thymoma\_stability analysis

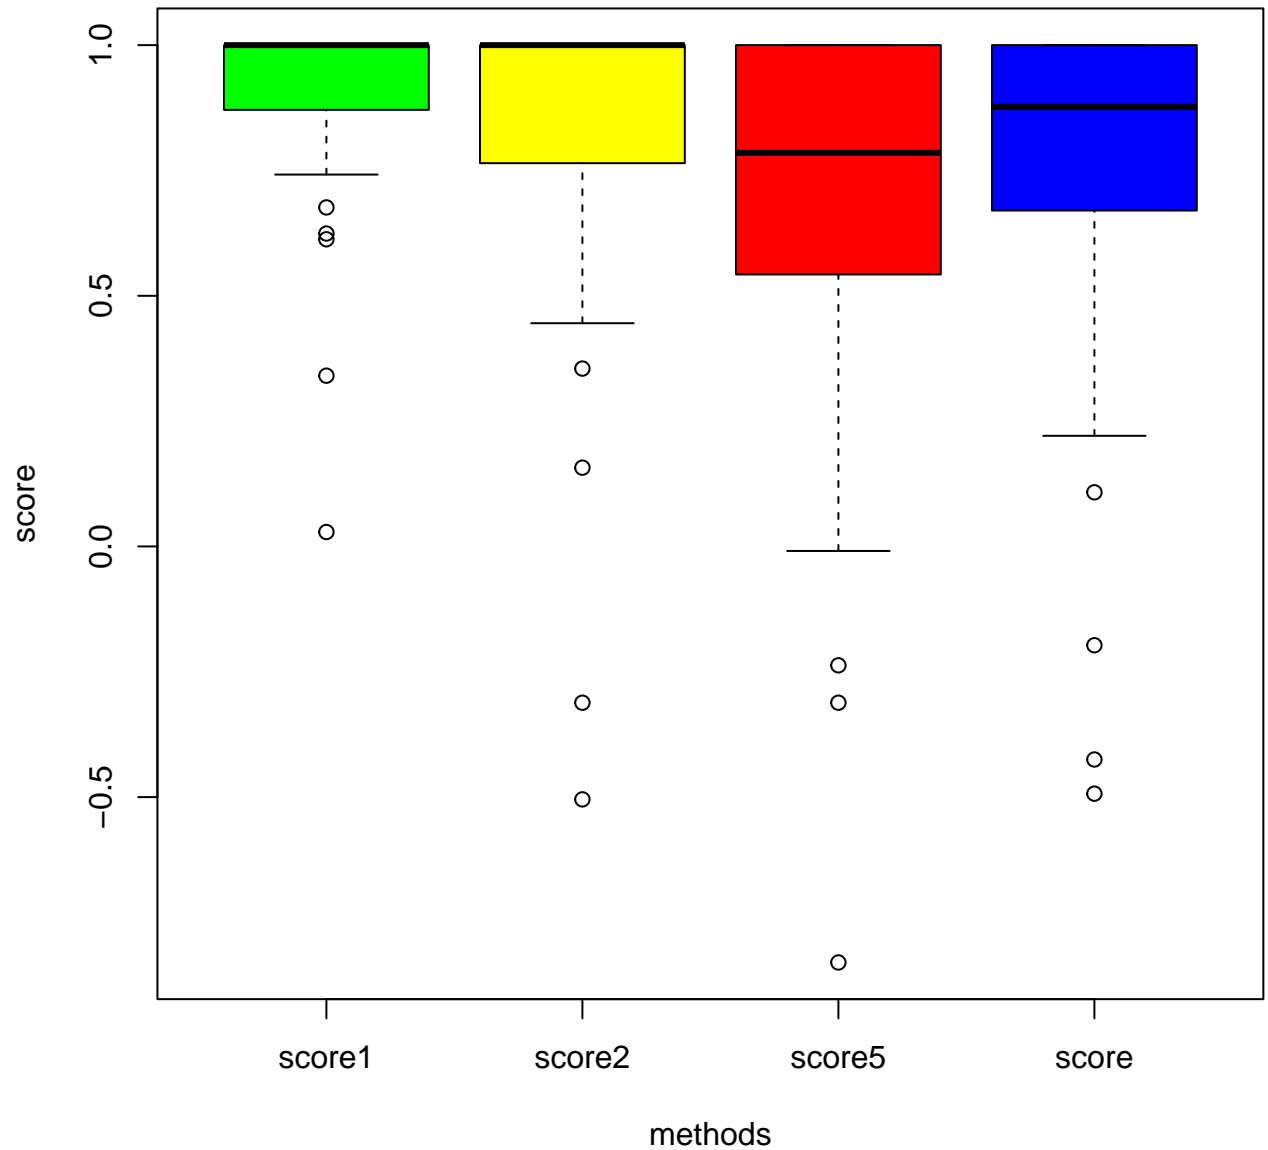

Supplement: s1 [file s1]

# malignant hypertension\_stability analysis

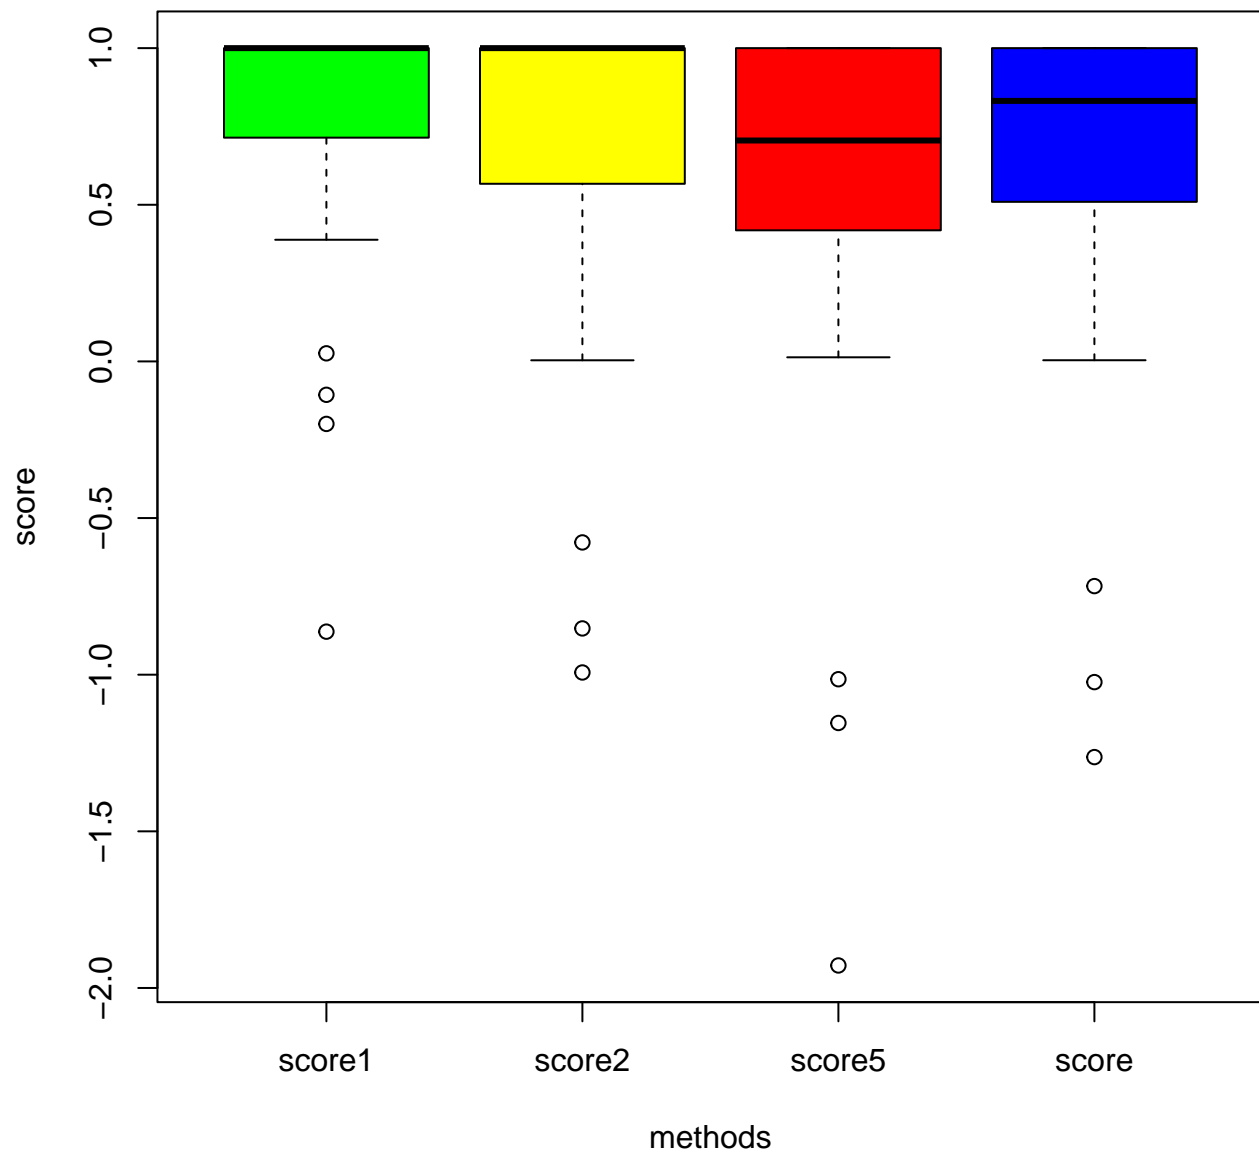

Supplement: s1 [file s1]

# diabetic angiopathy\_stability analysis

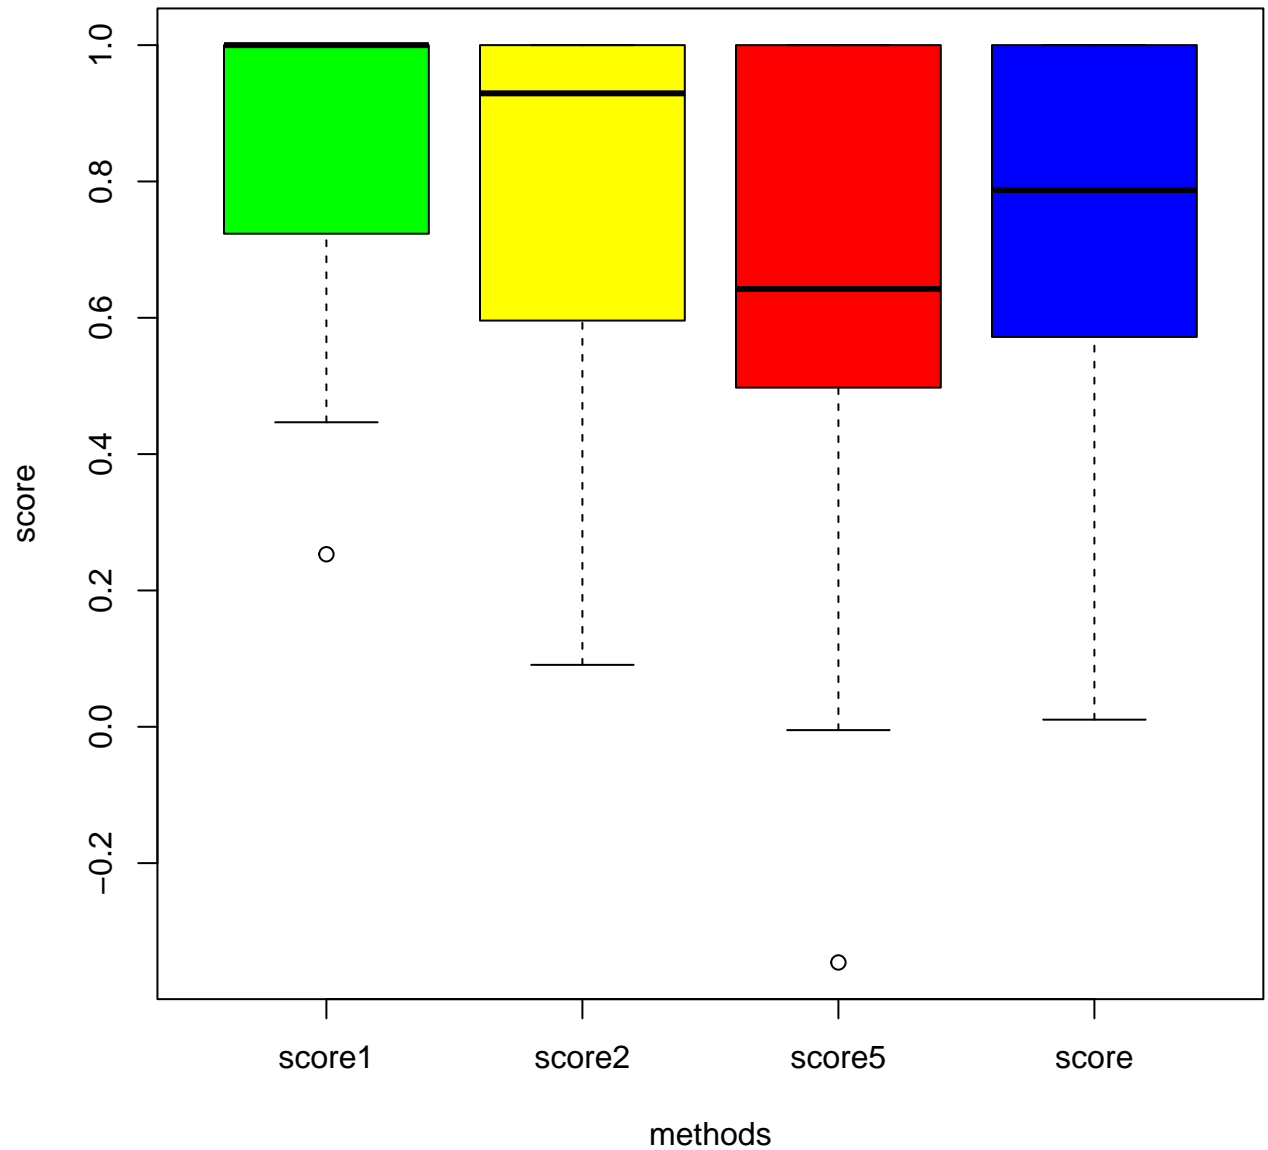

Supplement: s1 [file s1]

# aortic disease\_stability analysis

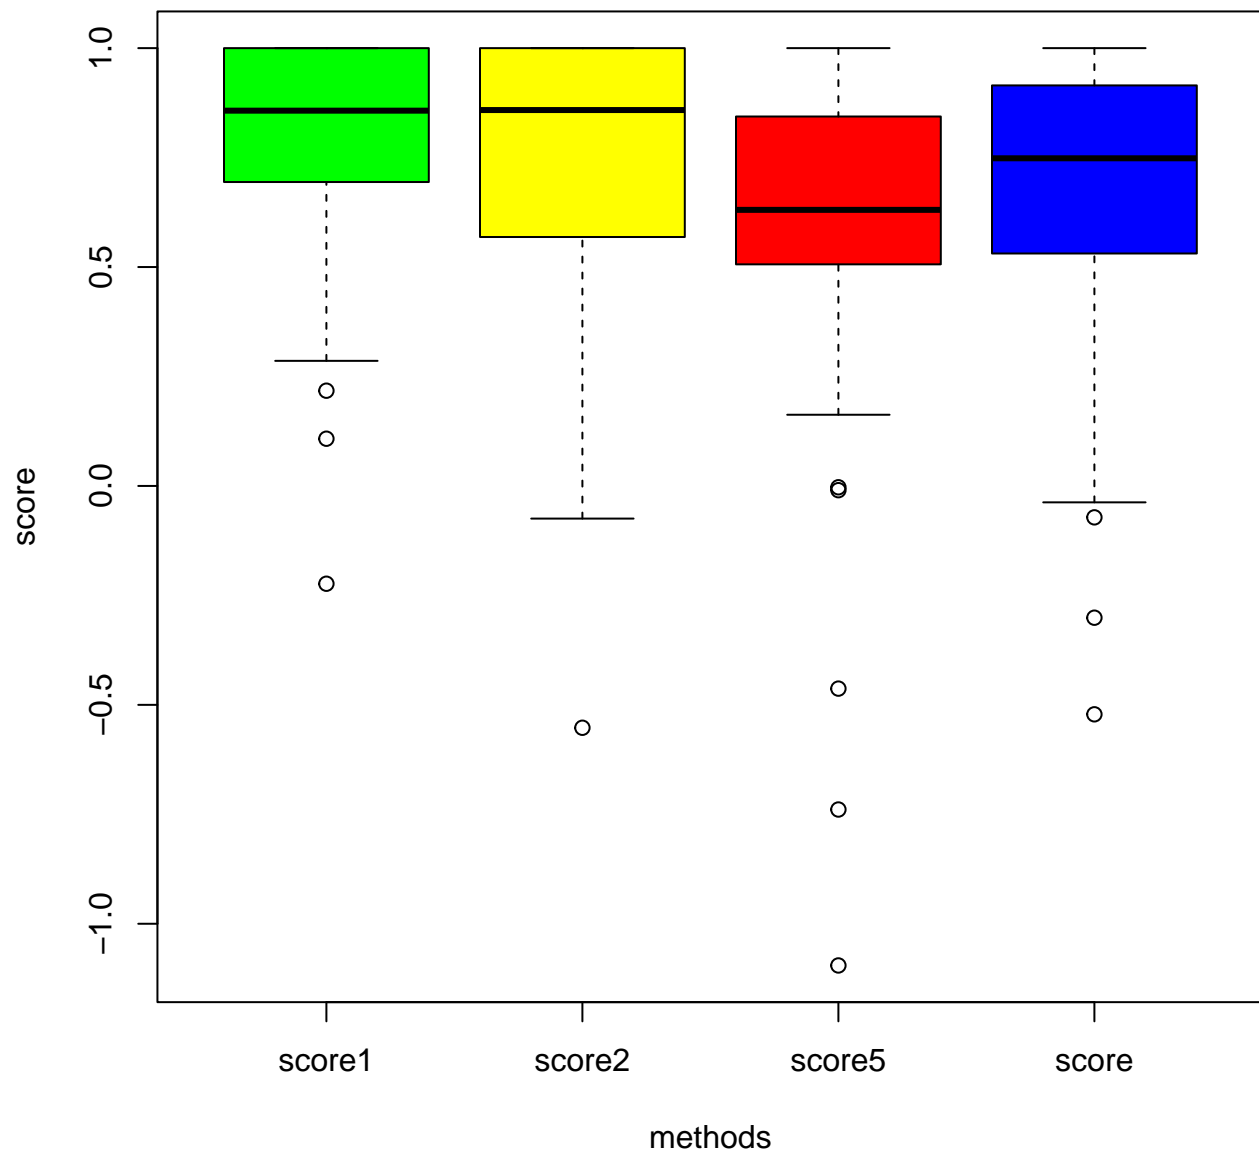

Supplement: s1 [file s1]

# pulmonary venoocclusive disease\_stability analysis

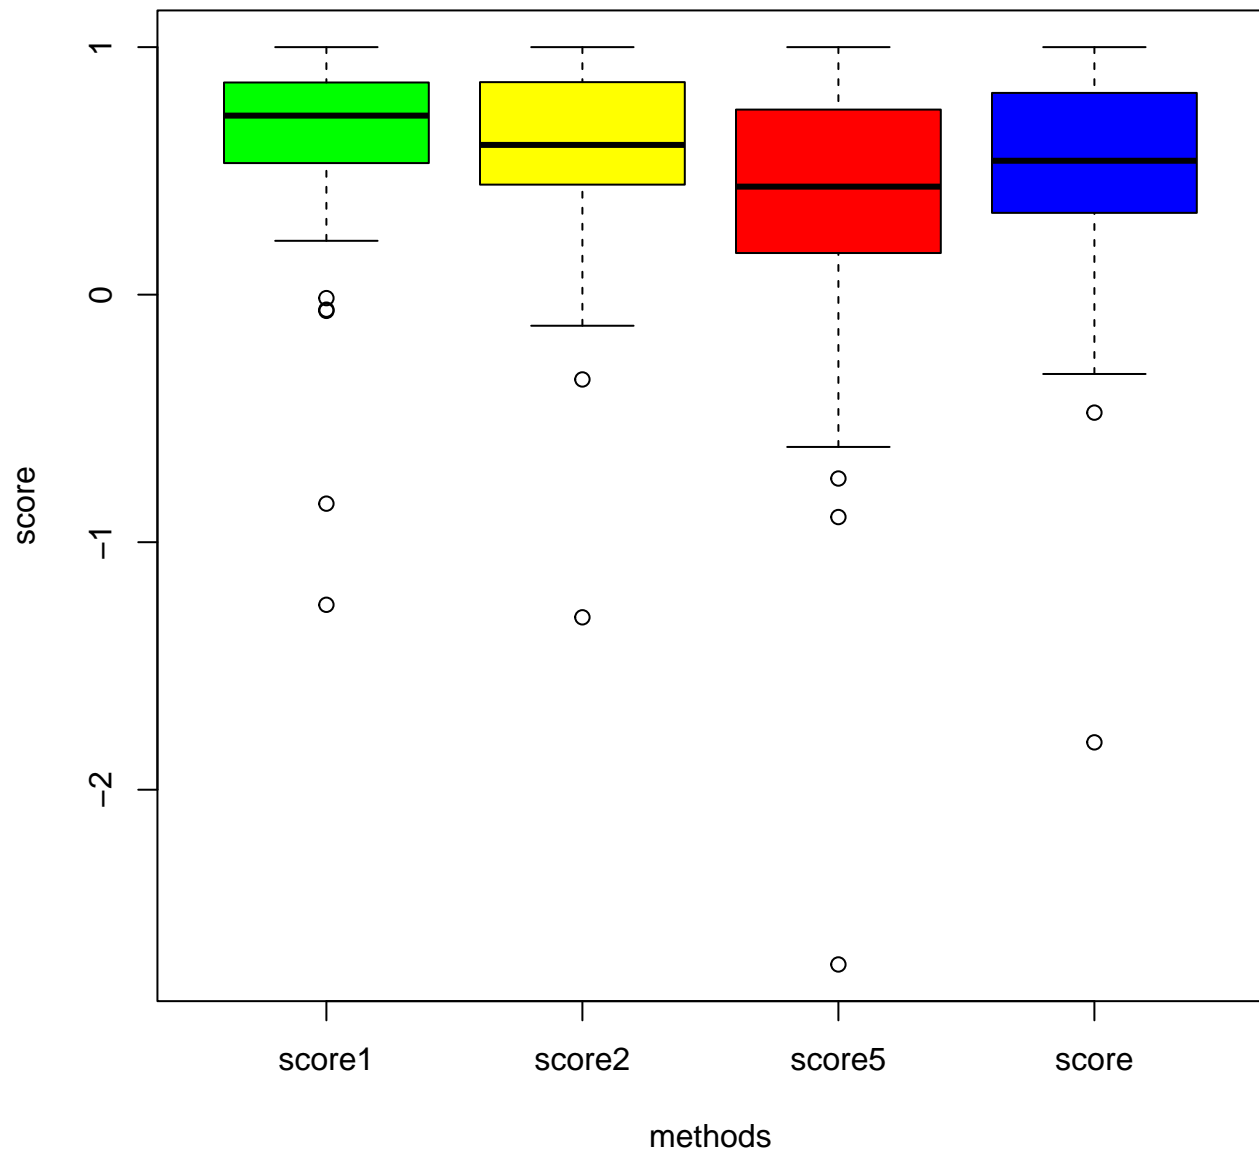

Supplement: s1 [file s1]

## Henoch-Schoenlein purpura\_stability analysis

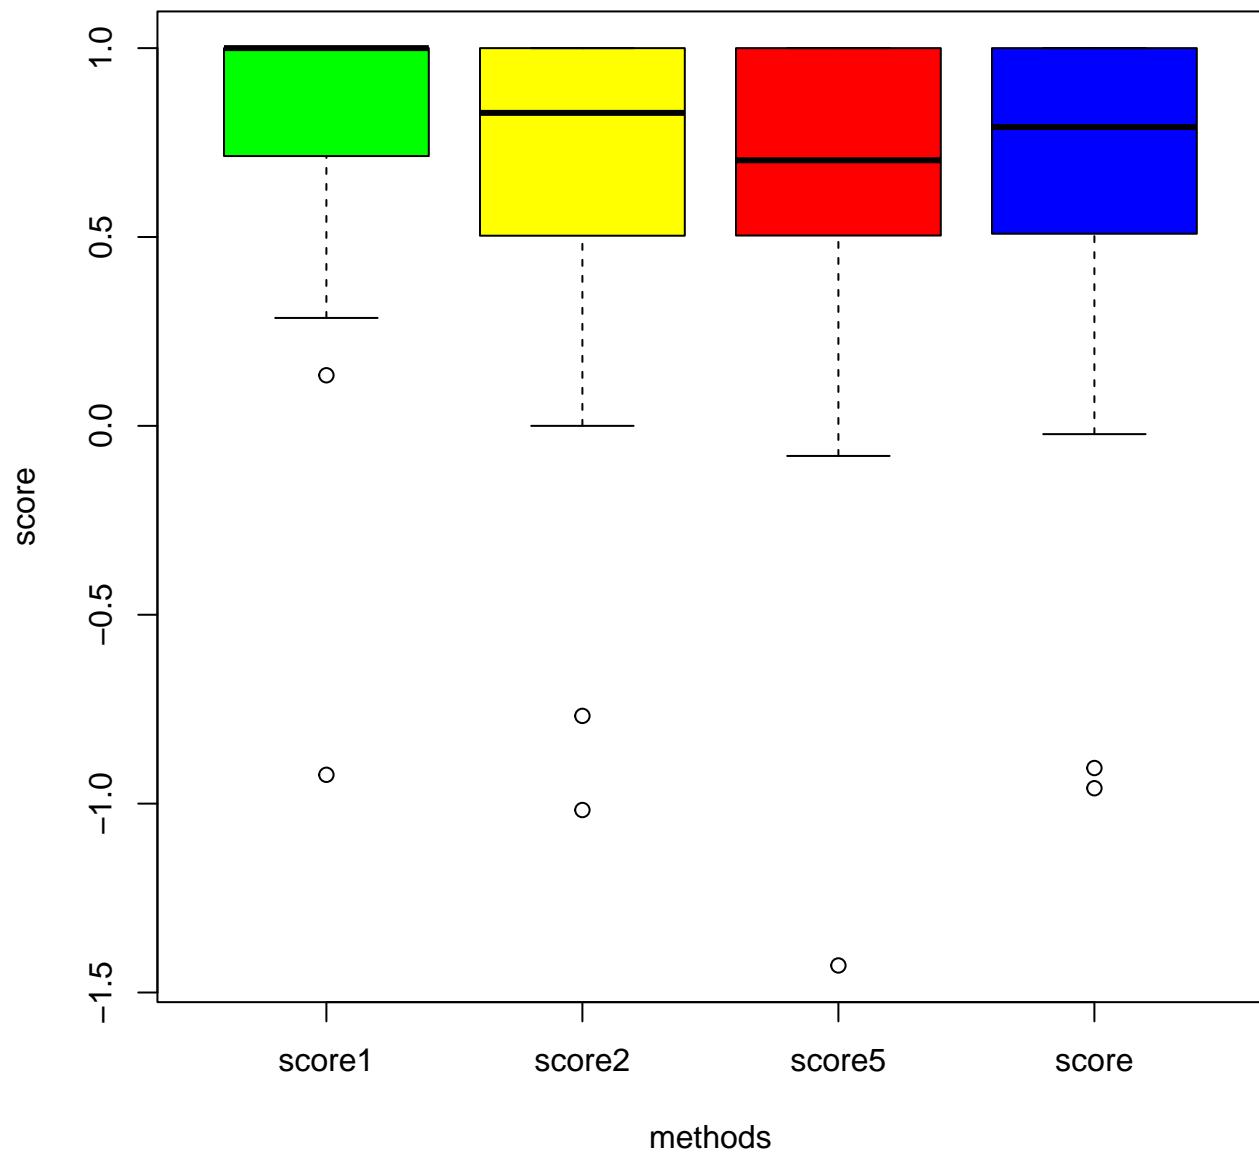

Supplement: s1 [file s1]

# biliary tract cancer\_stability analysis

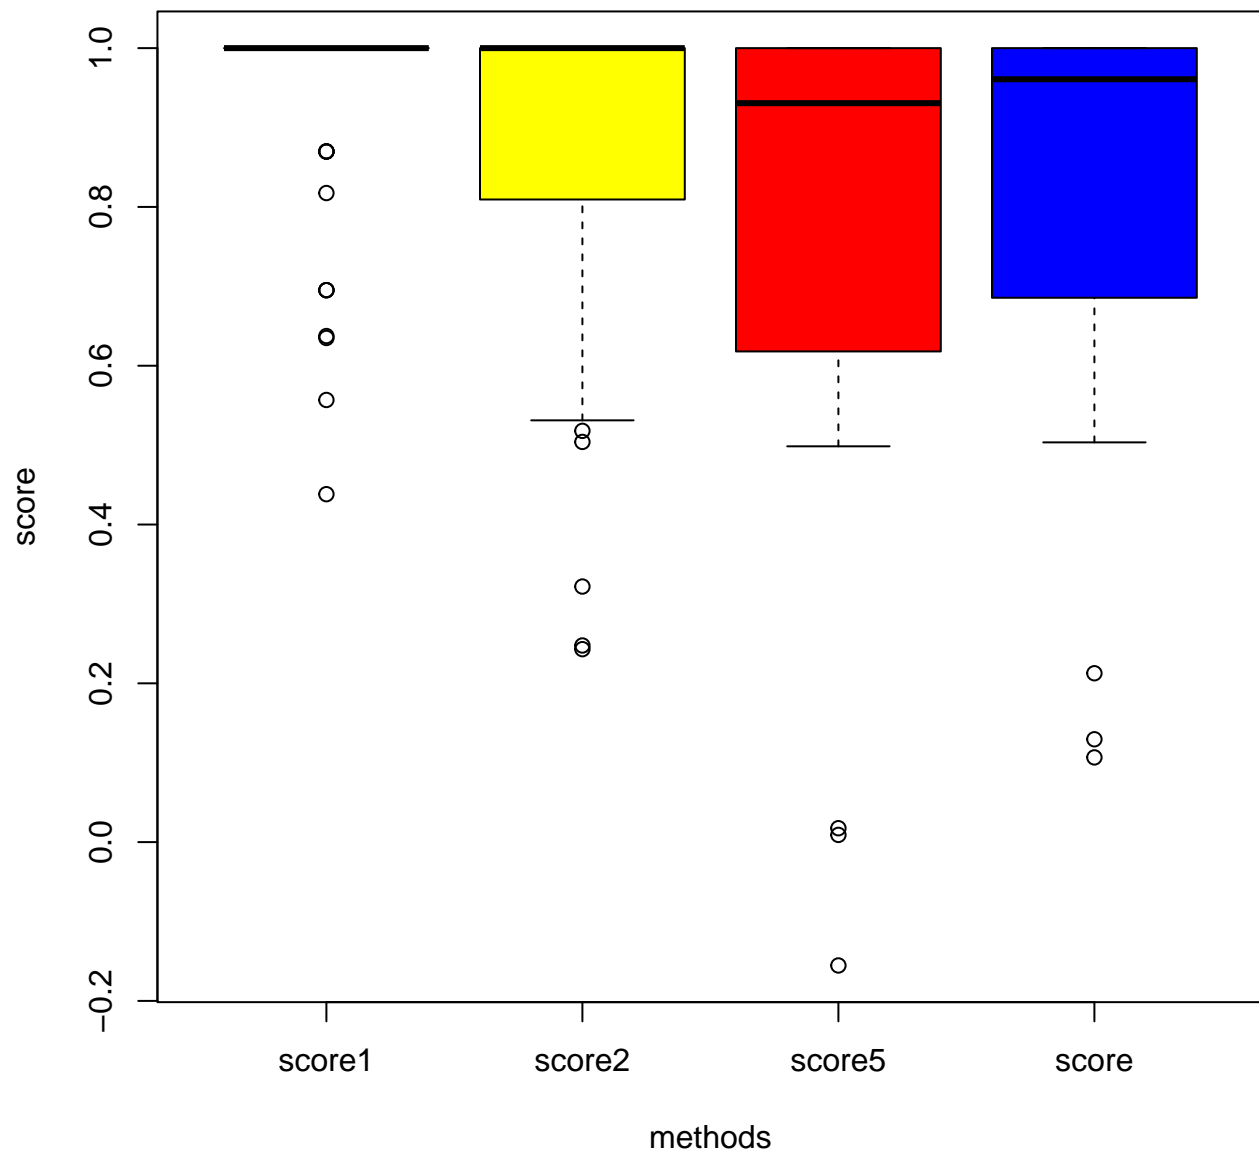

Supplement: s1 [file s1]

# intestinal cancer\_stability analysis

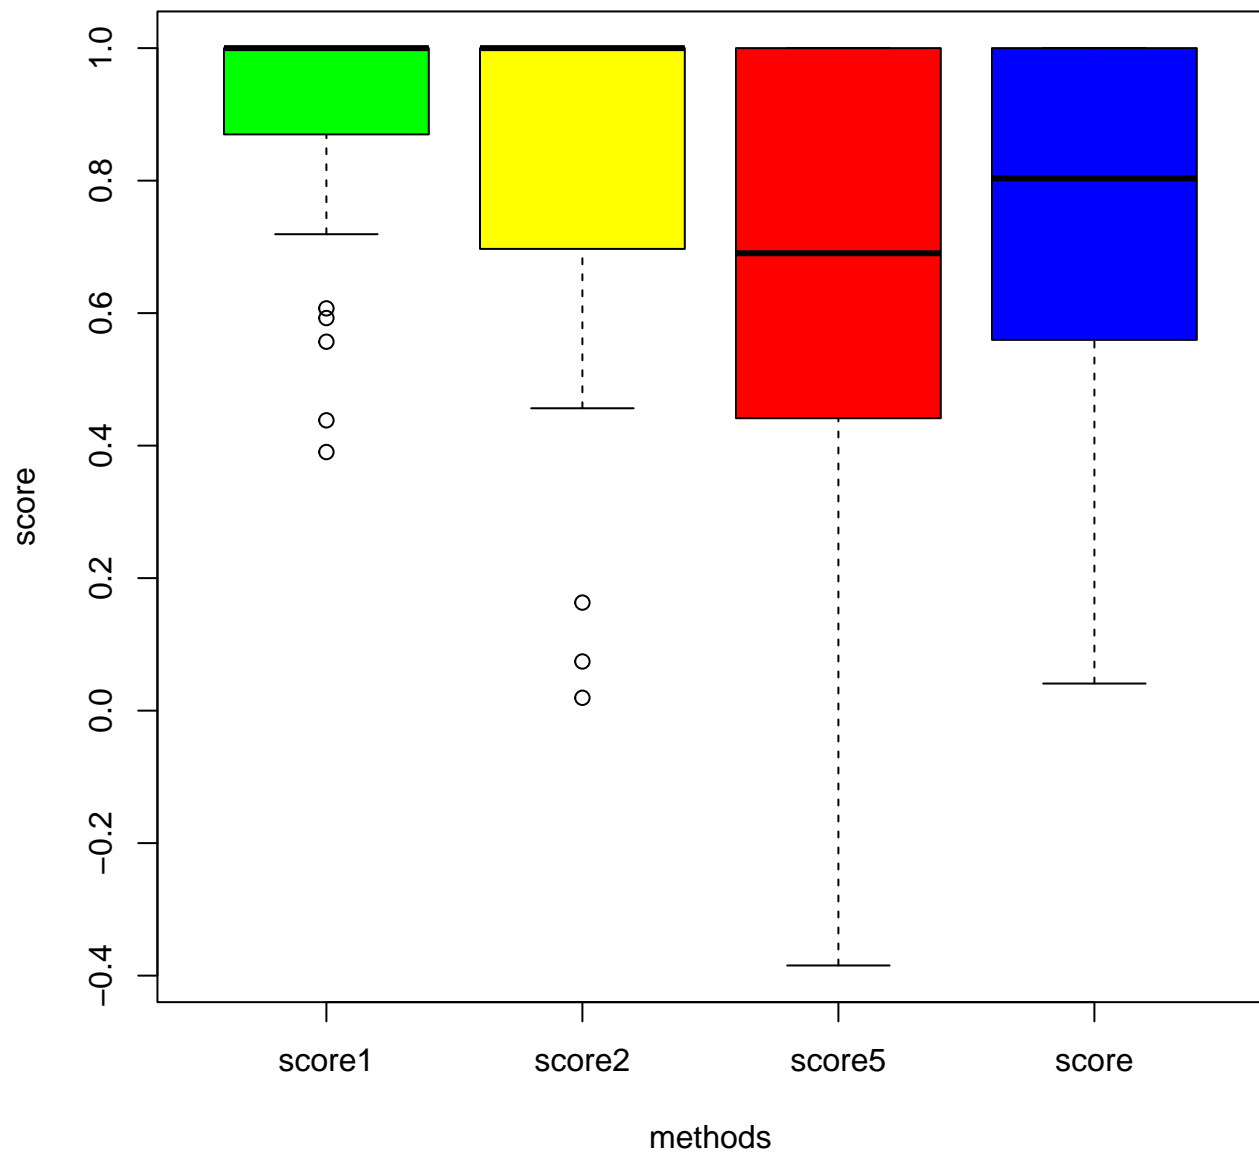

Supplement: s1 [file s1]

# multiple system atrophy\_stability analysis

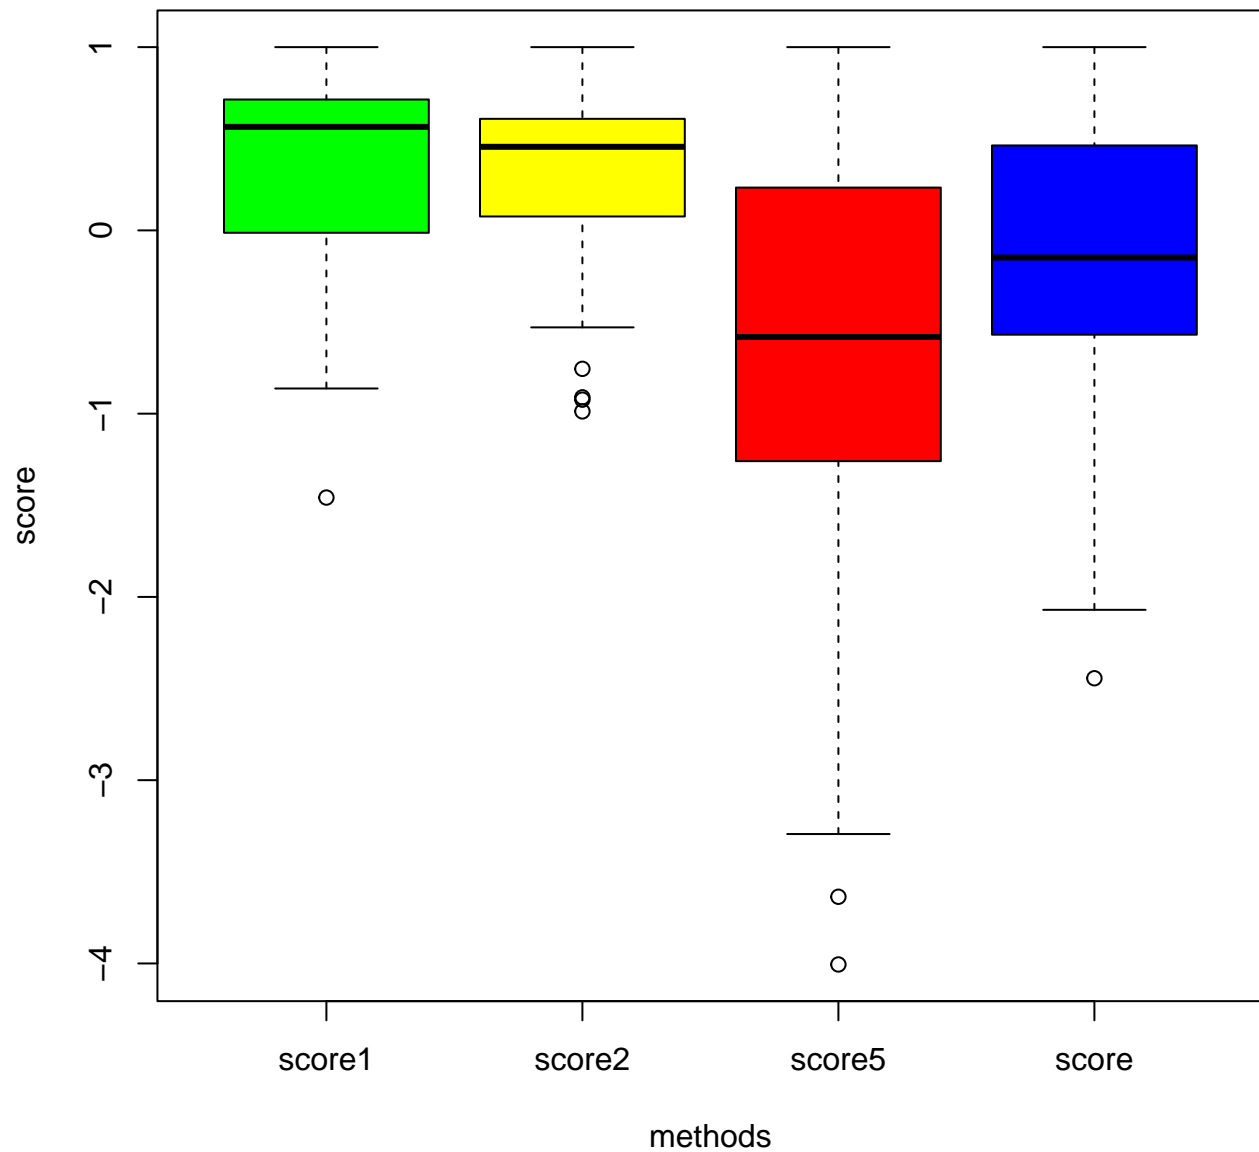

Supplement: s1 [file s1]

# pancreatic cancer\_stability analysis

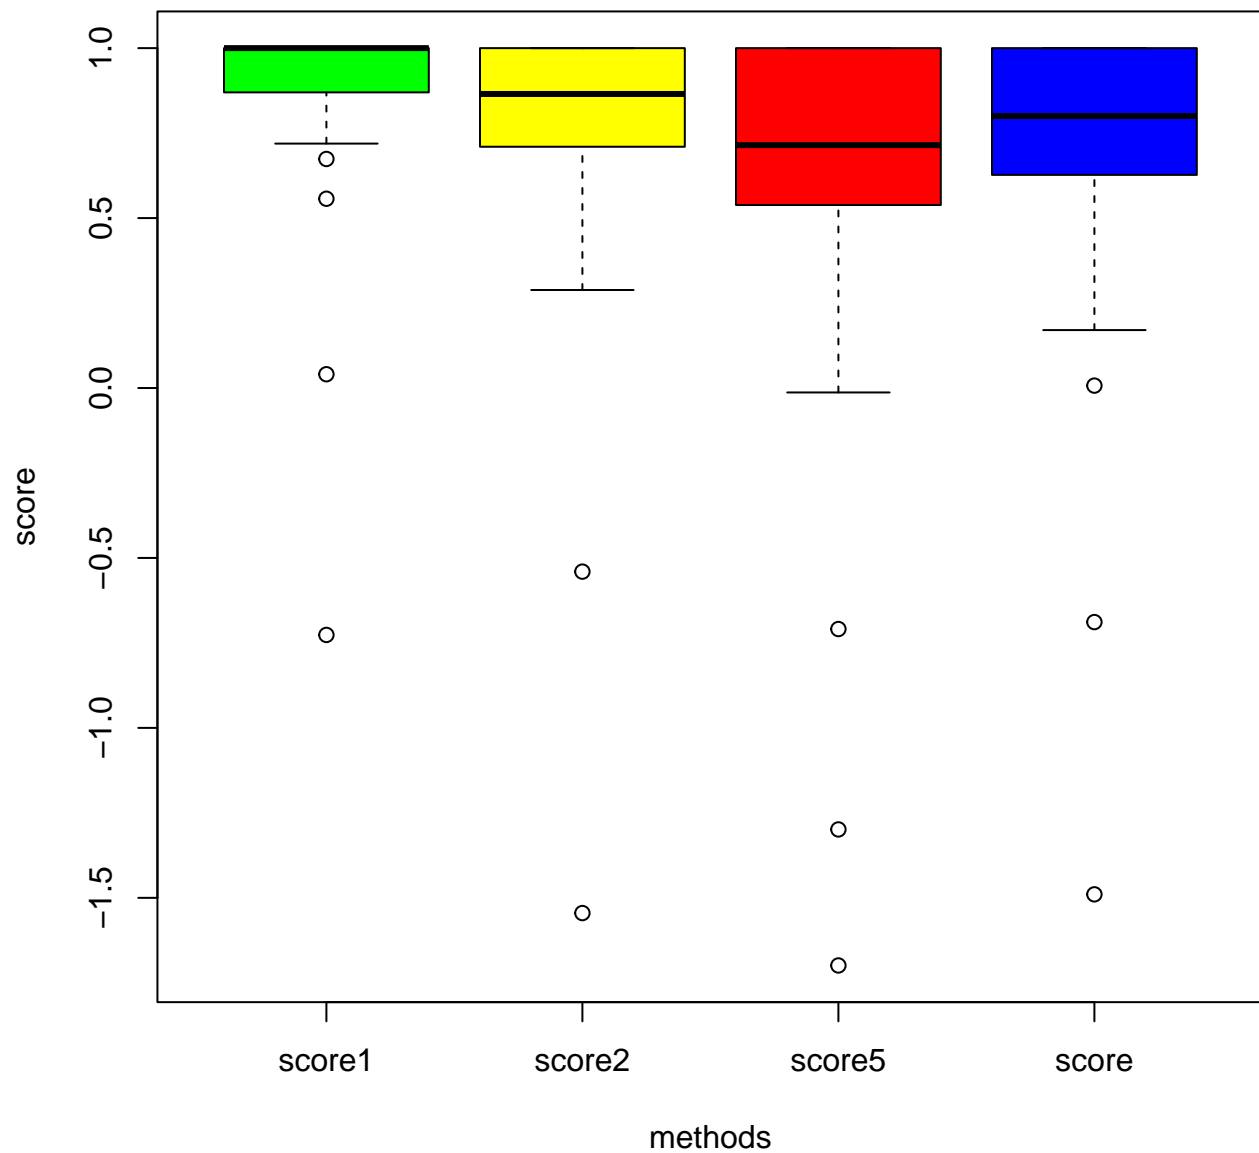

Supplement: s1 [file s1]

# thymus cancer\_stability analysis

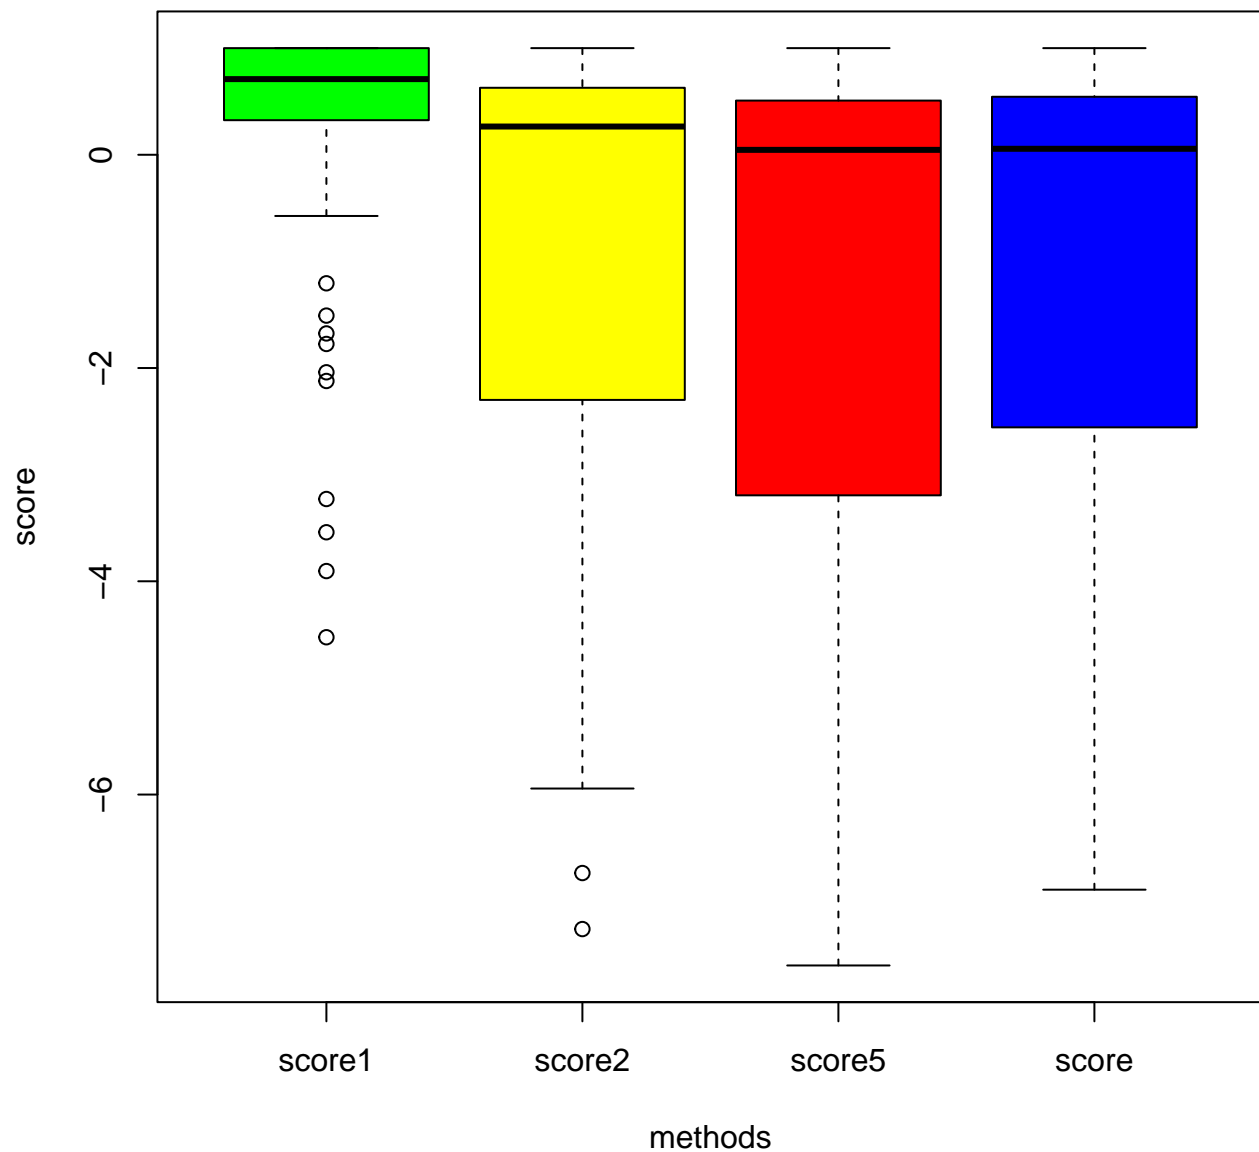

Supplement: s1 [file s1]

# coronary stenosis\_stability analysis

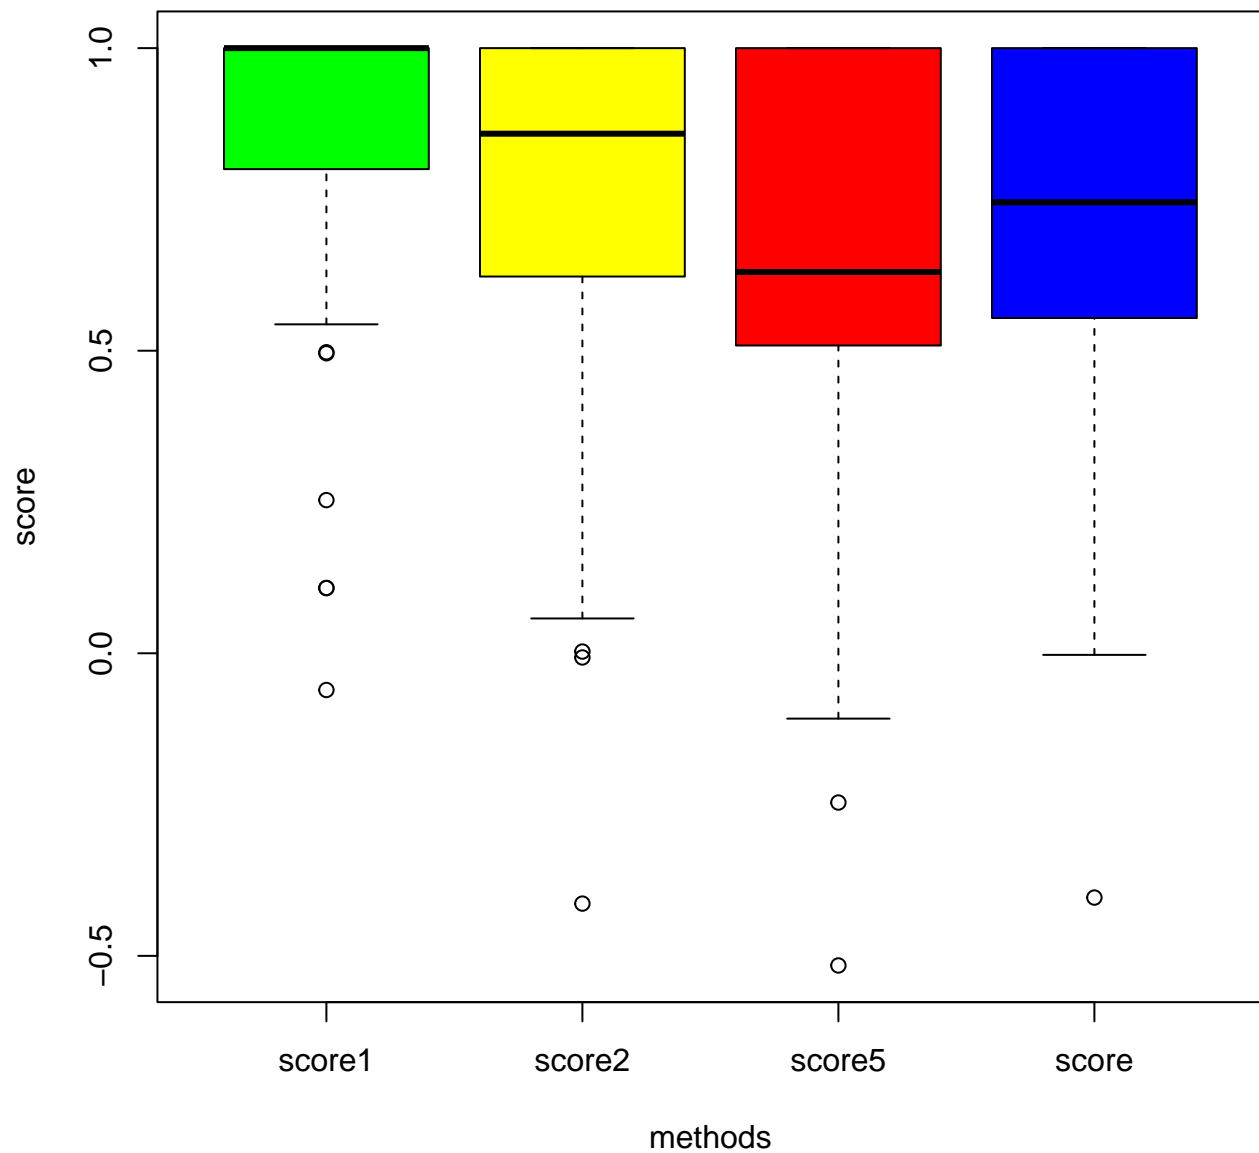

Supplement: s1 [file s1]

# renovascular hypertension\_stability analysis

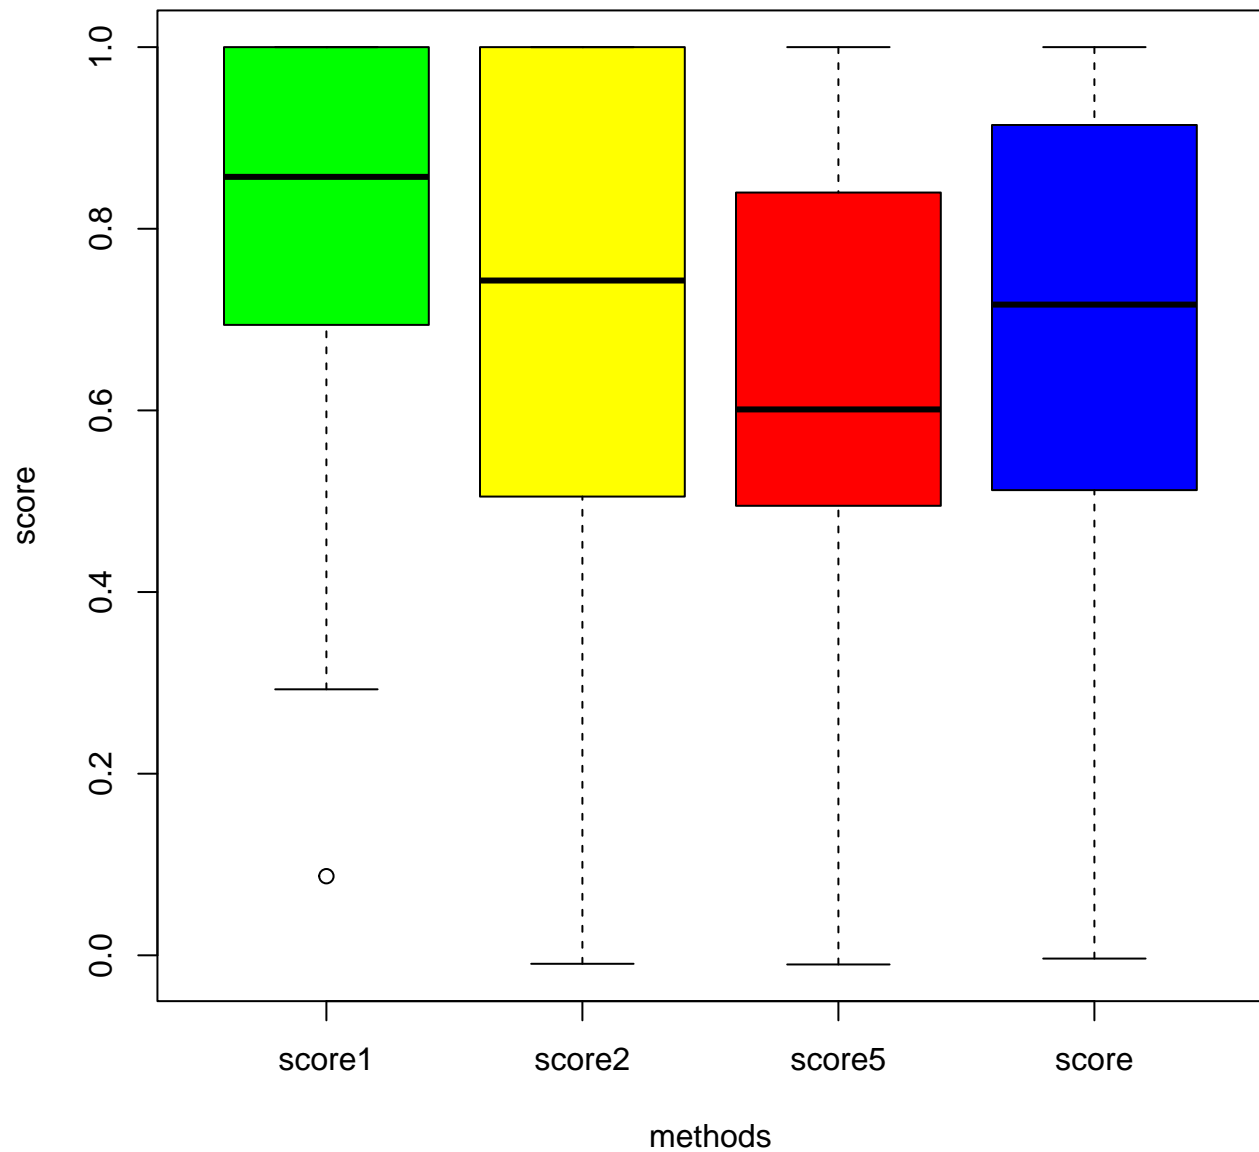

Supplement: s1 [file s1]

# adrenal gland cancer\_stability analysis

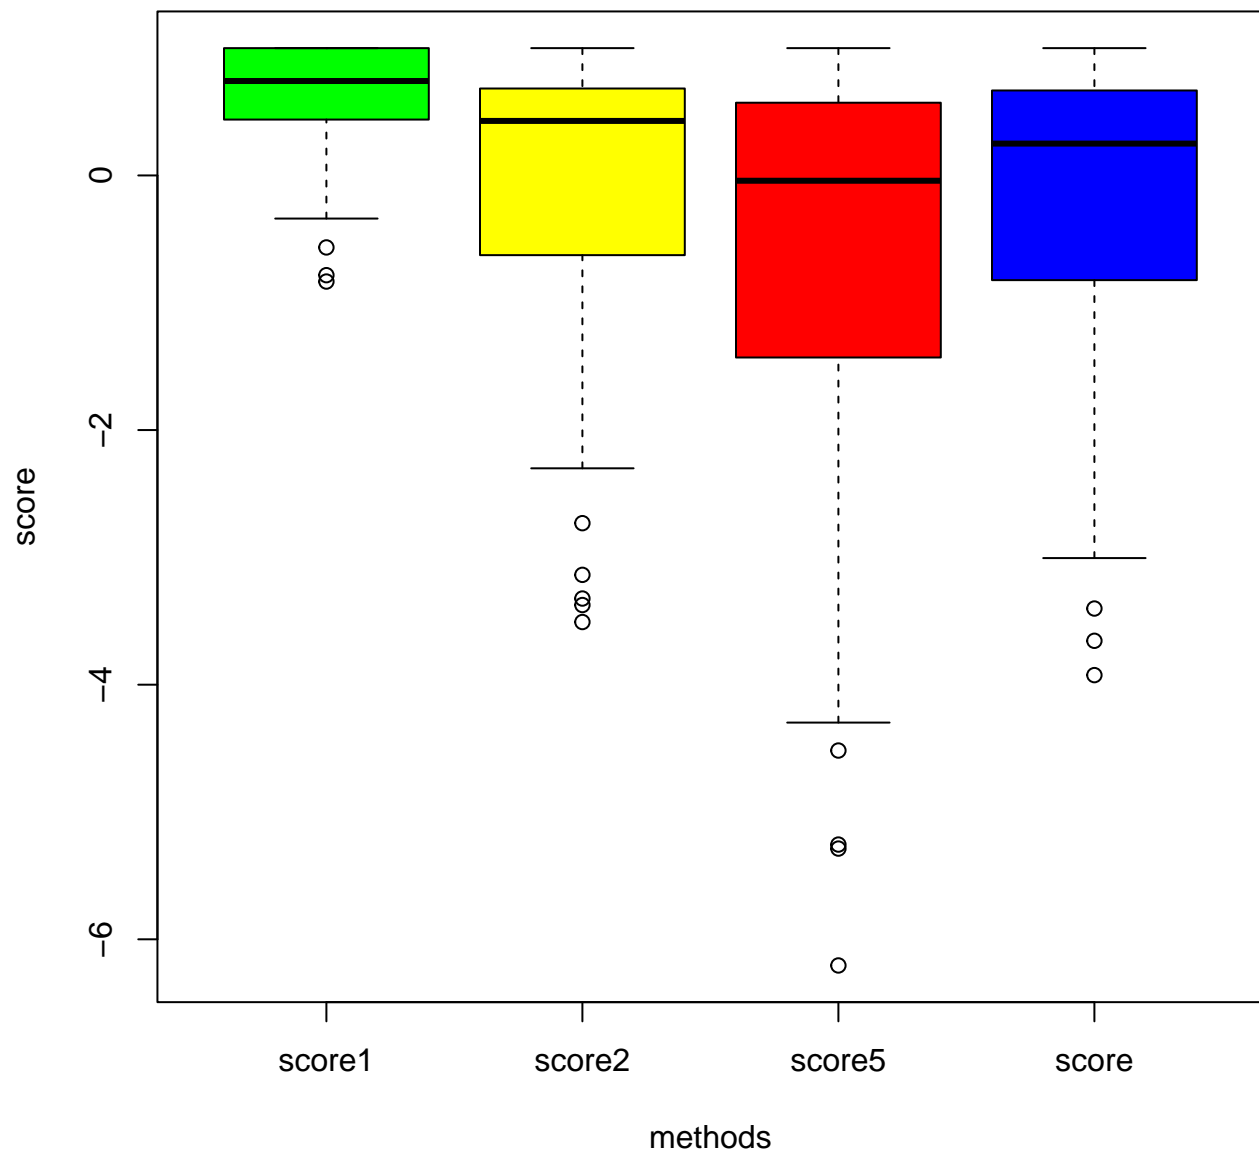

Supplement: s1 [file s1]

# brain infarction\_stability analysis

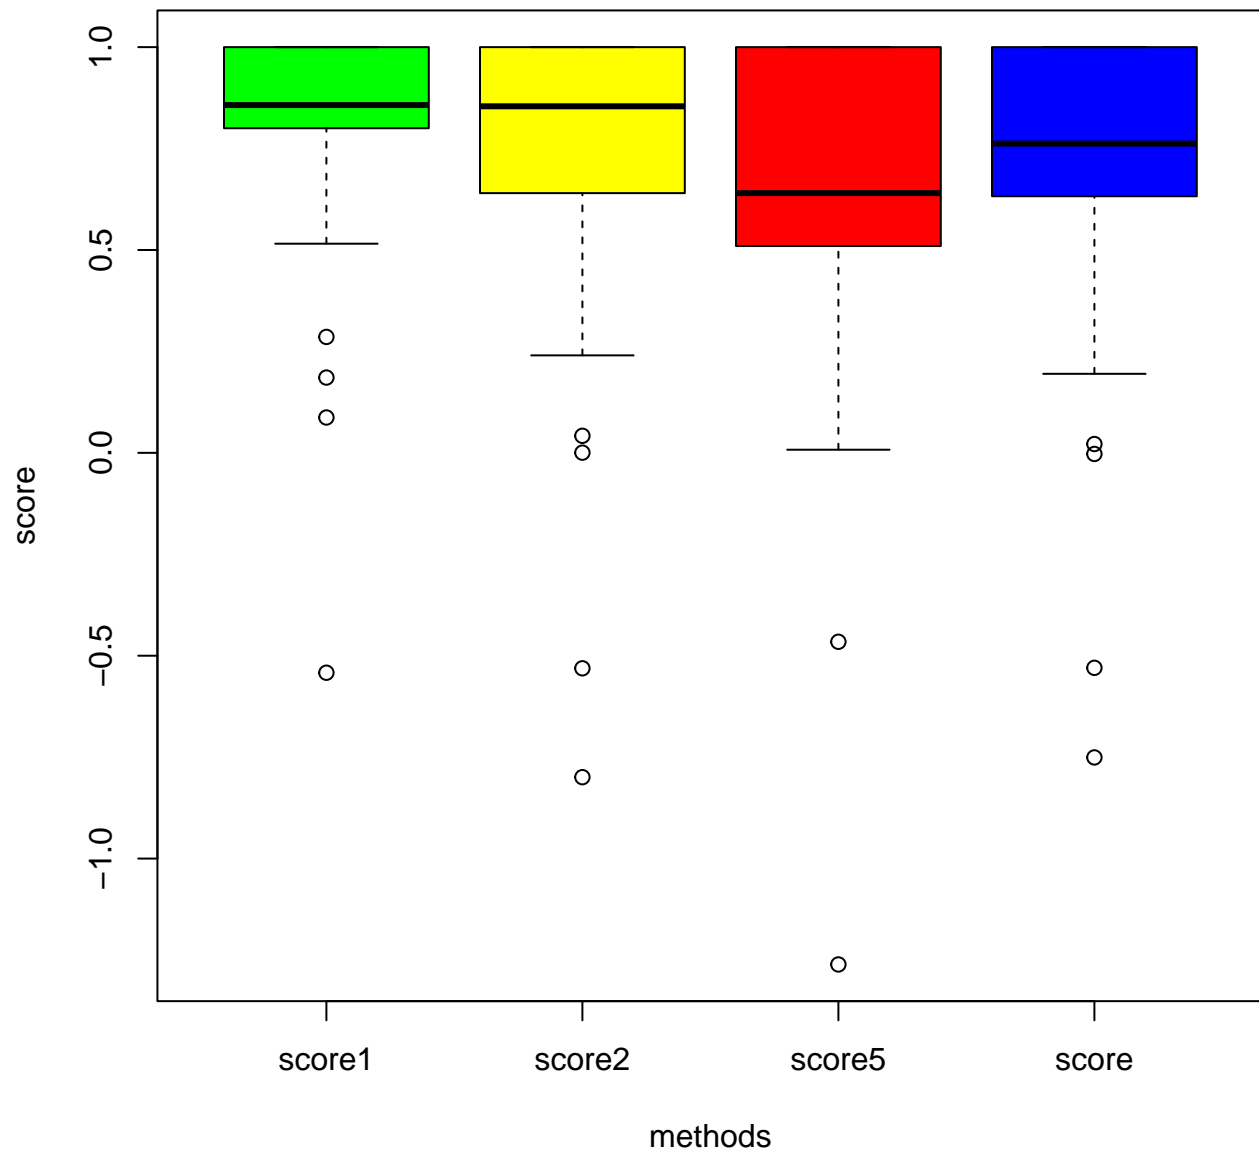

Supplement: s1 [file s1]

# retinal vein occlusion\_stability analysis

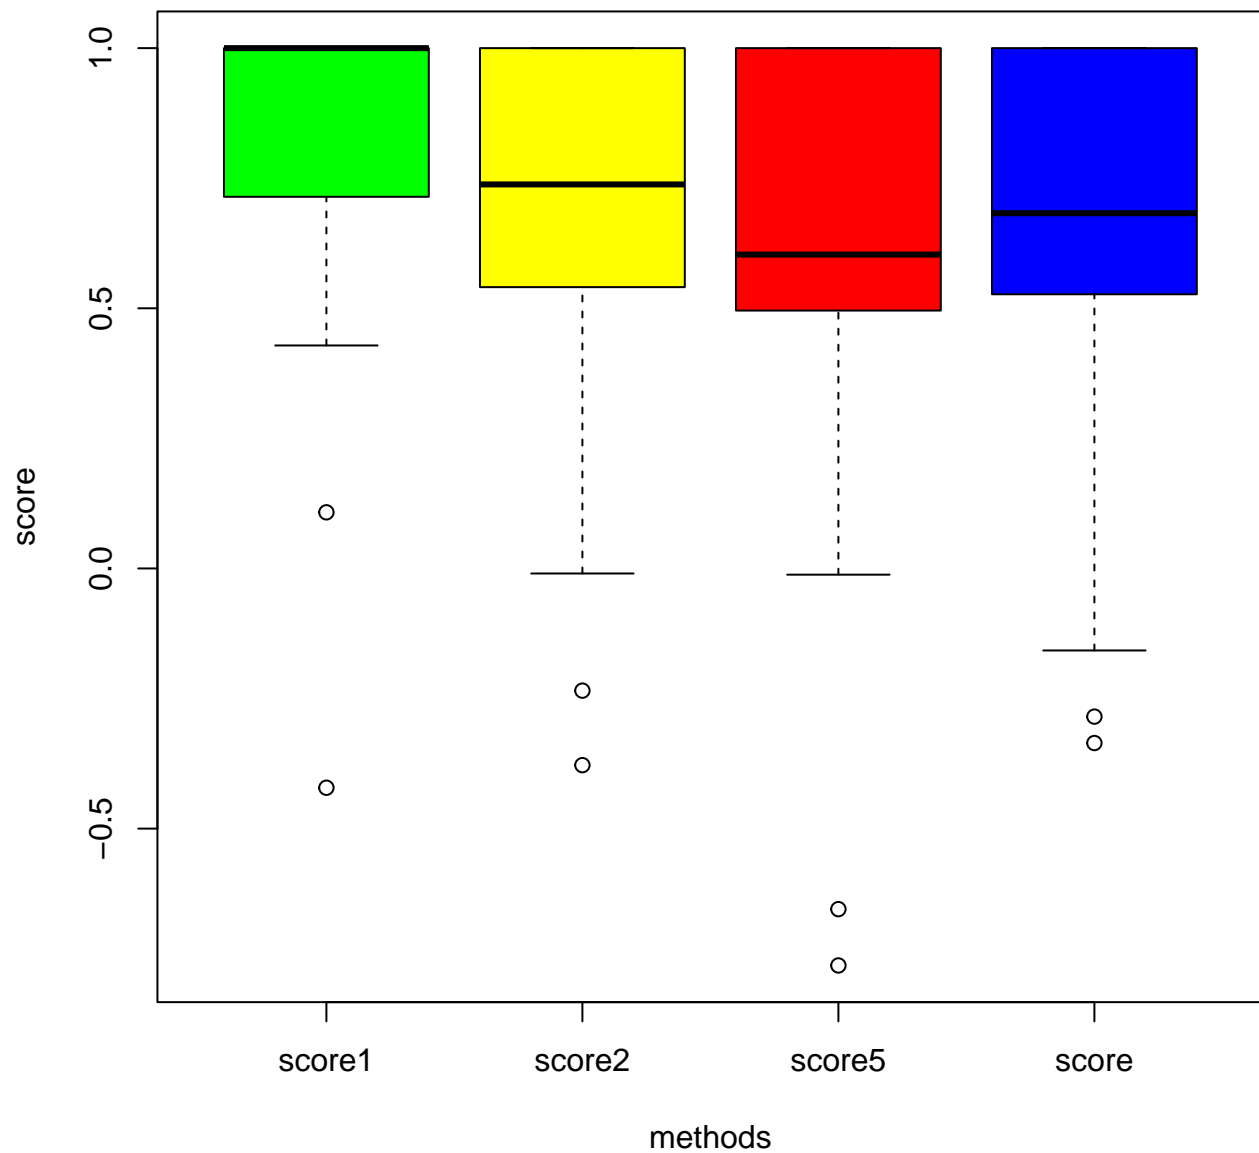

Supplement: s1 [file s1]

# stability analysis

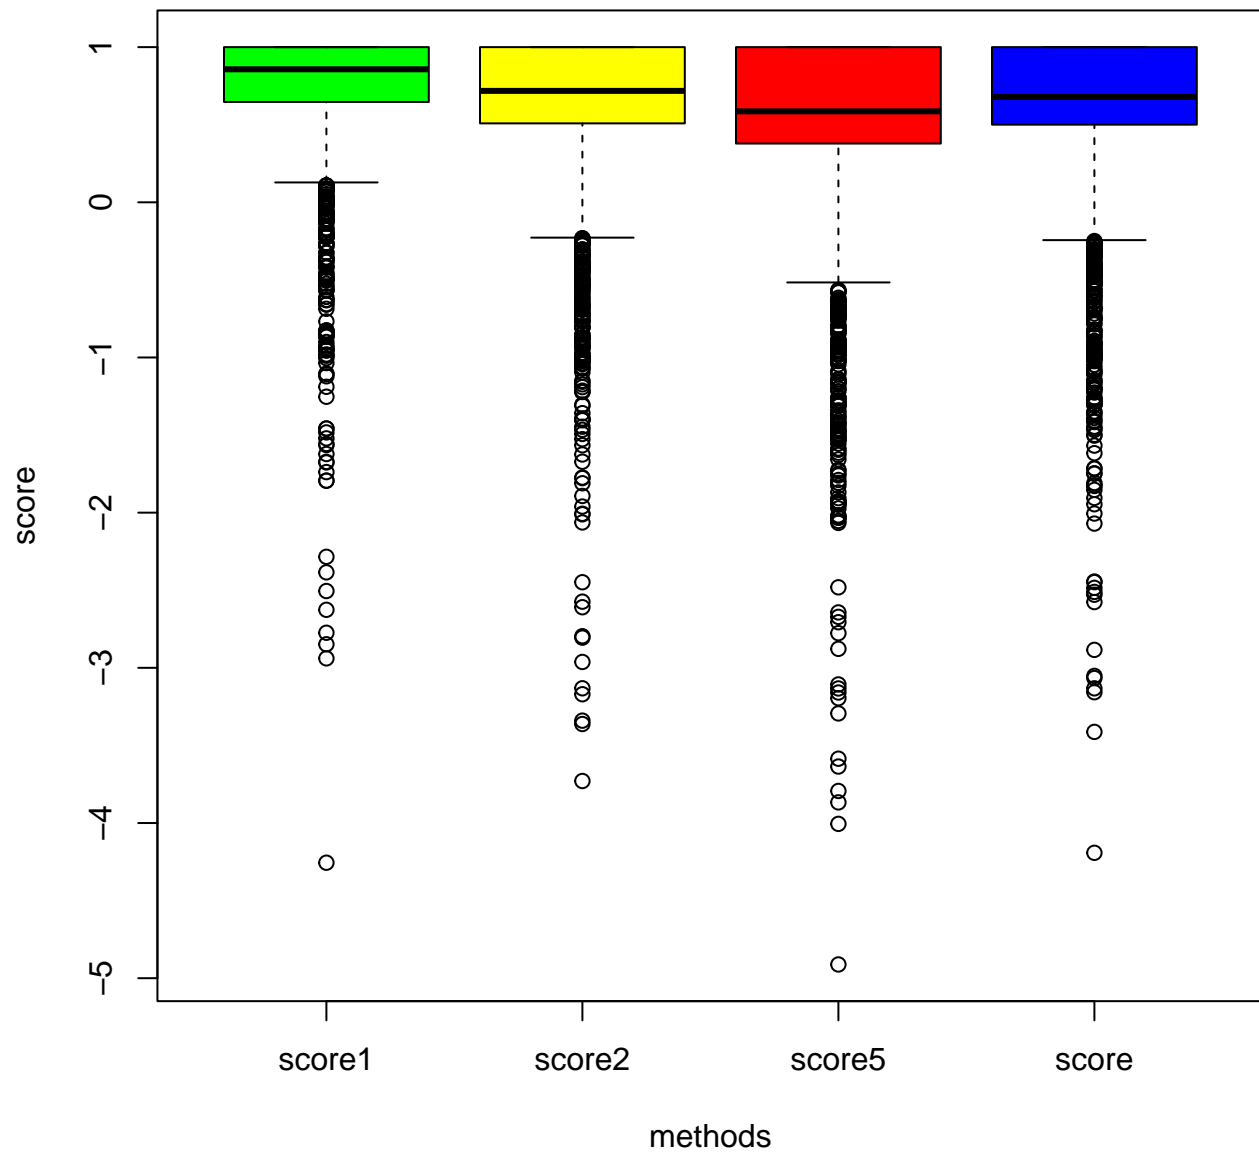

Supplement: s1 [file s1]

# cervical cancer\_stability analysis

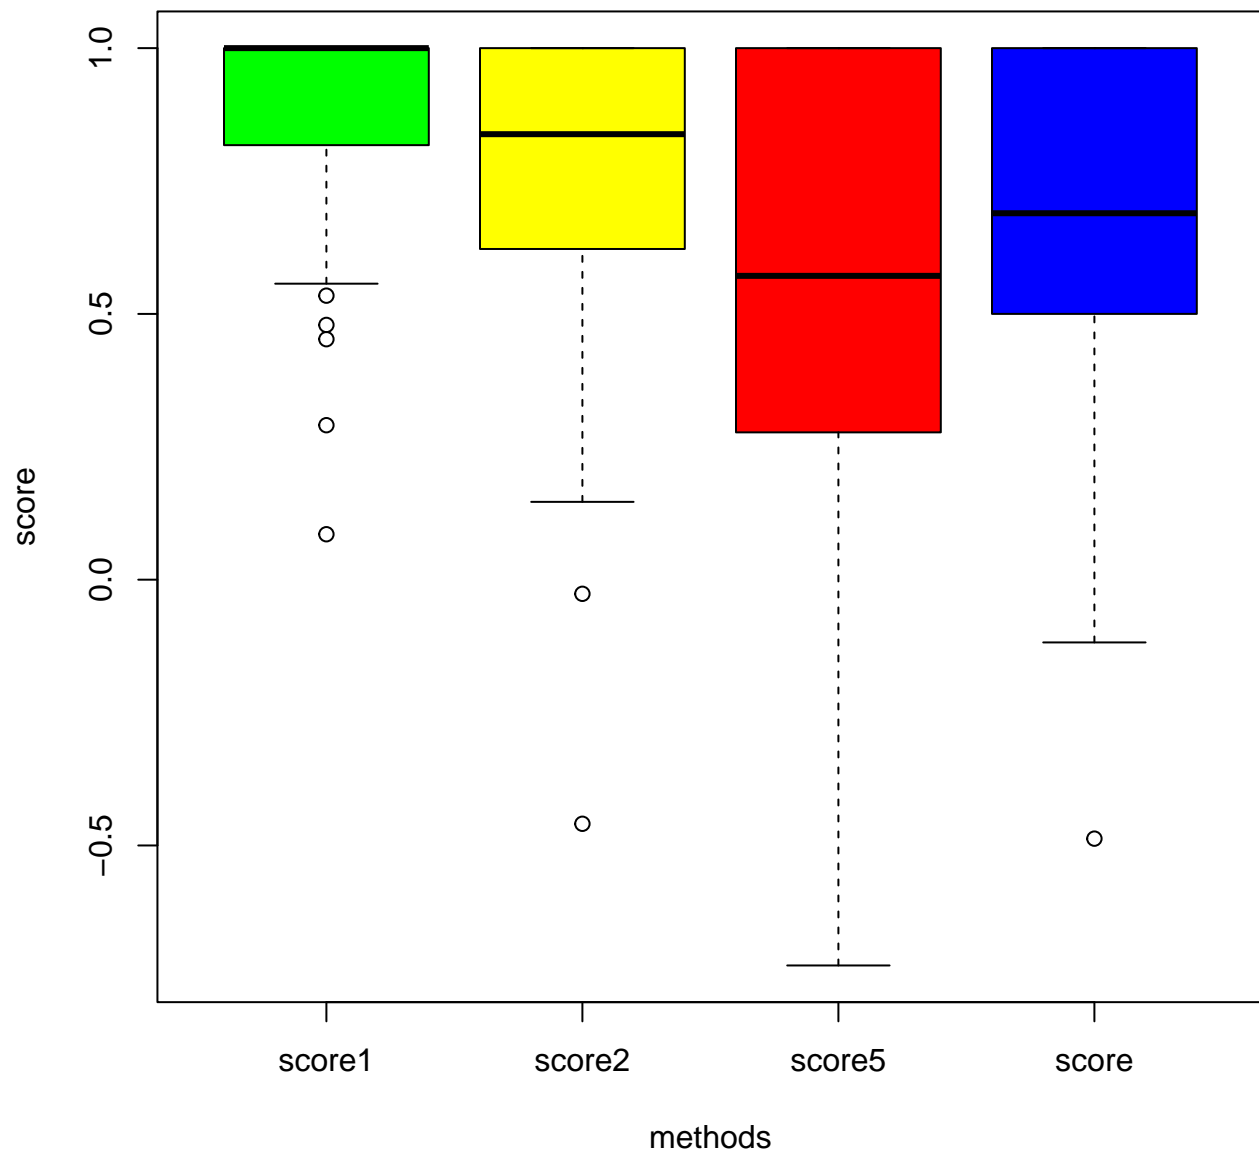

Supplement: s1 [file s1]

# large intestine cancer\_stability analysis

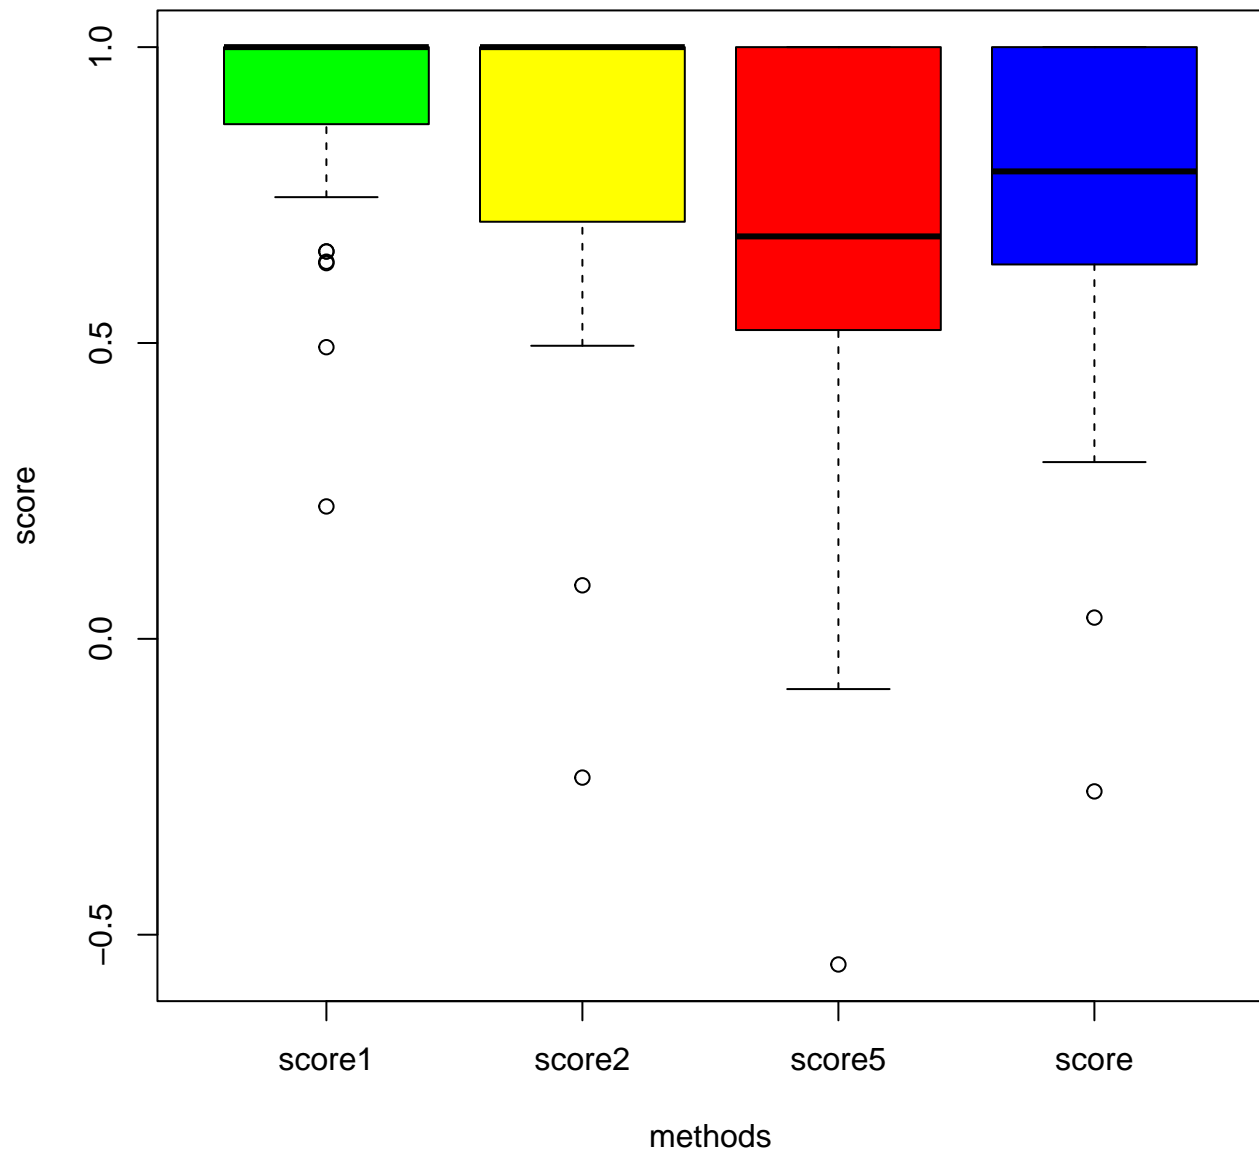

Supplement: s1 [file s1]

# central nervous system cancer\_stability analysis

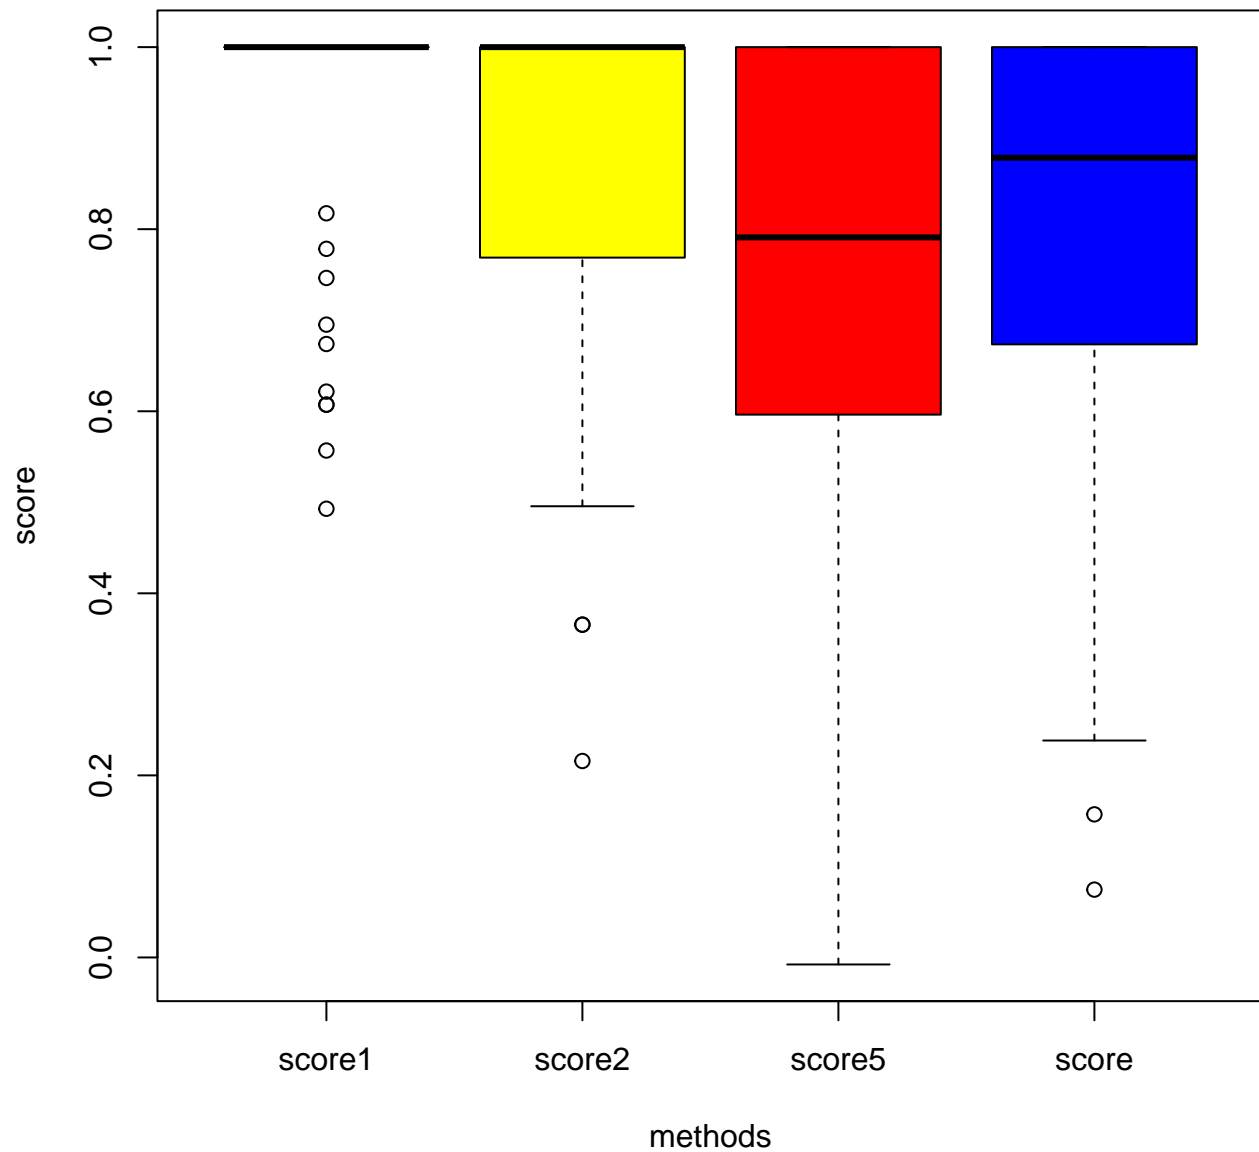

Supplement: s1 [file s1]

# ataxia telangiectasia\_stability analysis

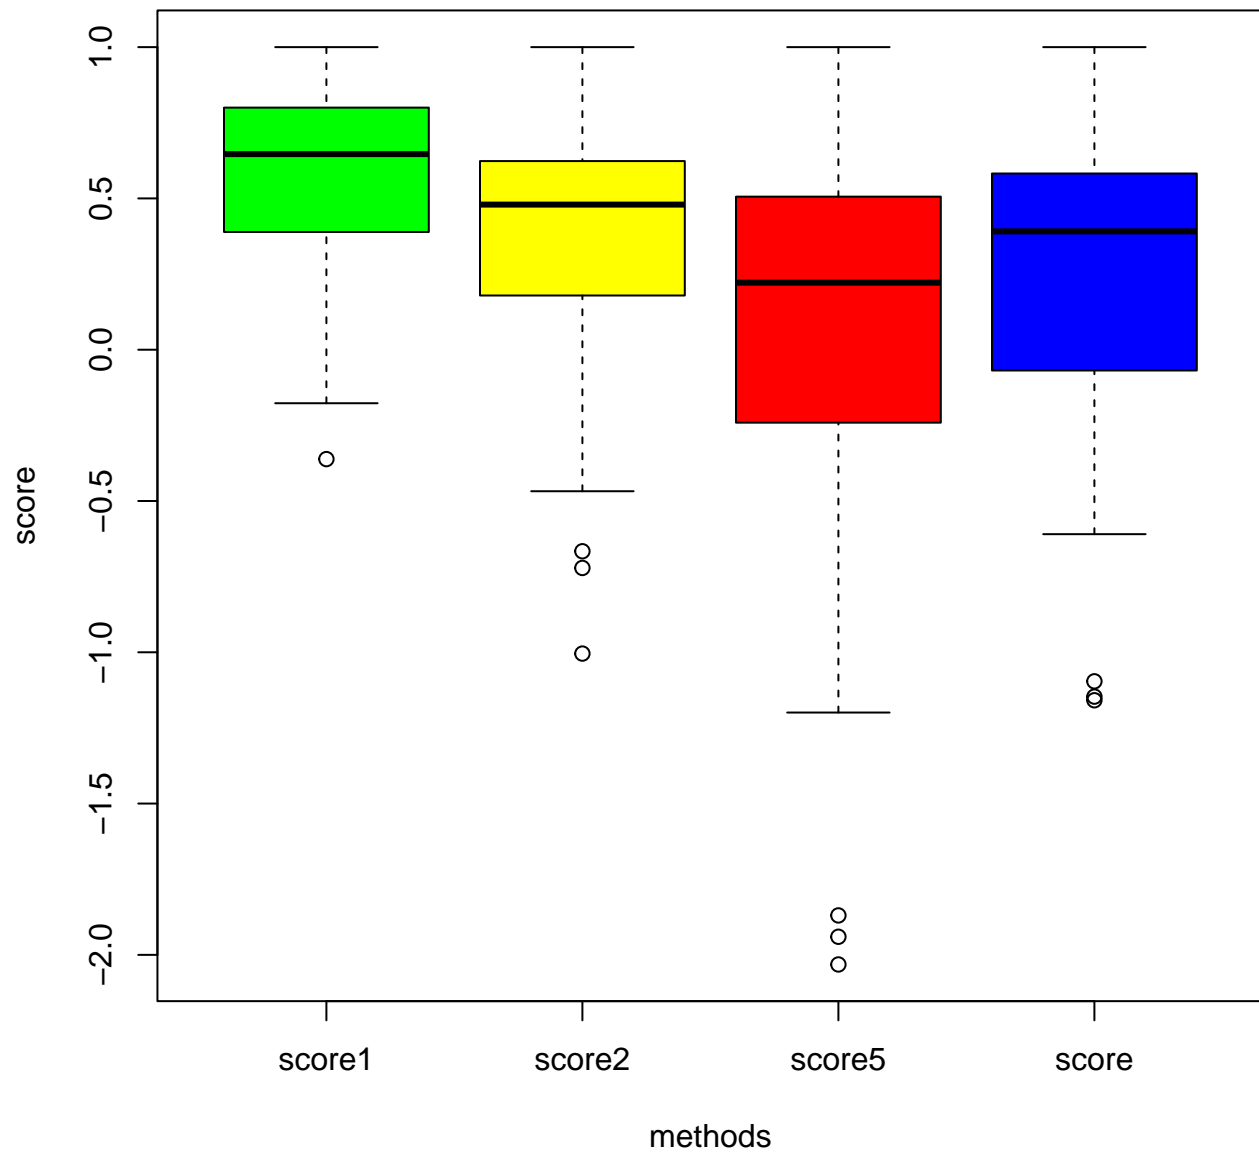

Supplement: s1 [file s1]

# carotid artery disease\_stability analysis

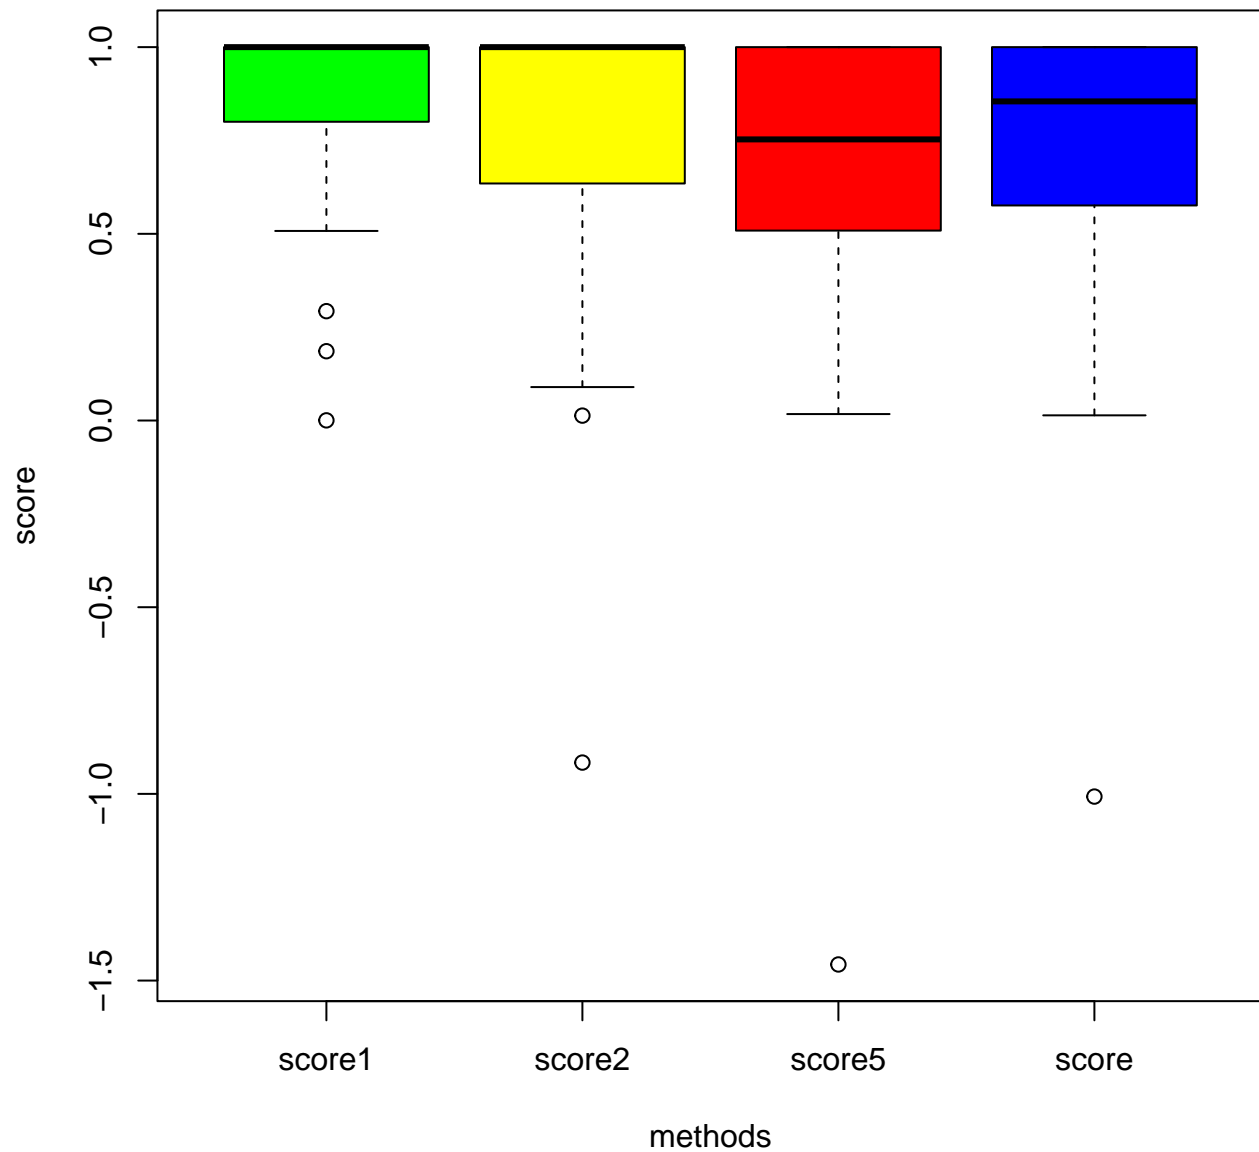

Supplement: s1 [file s1]

# testicular cancer\_stability analysis

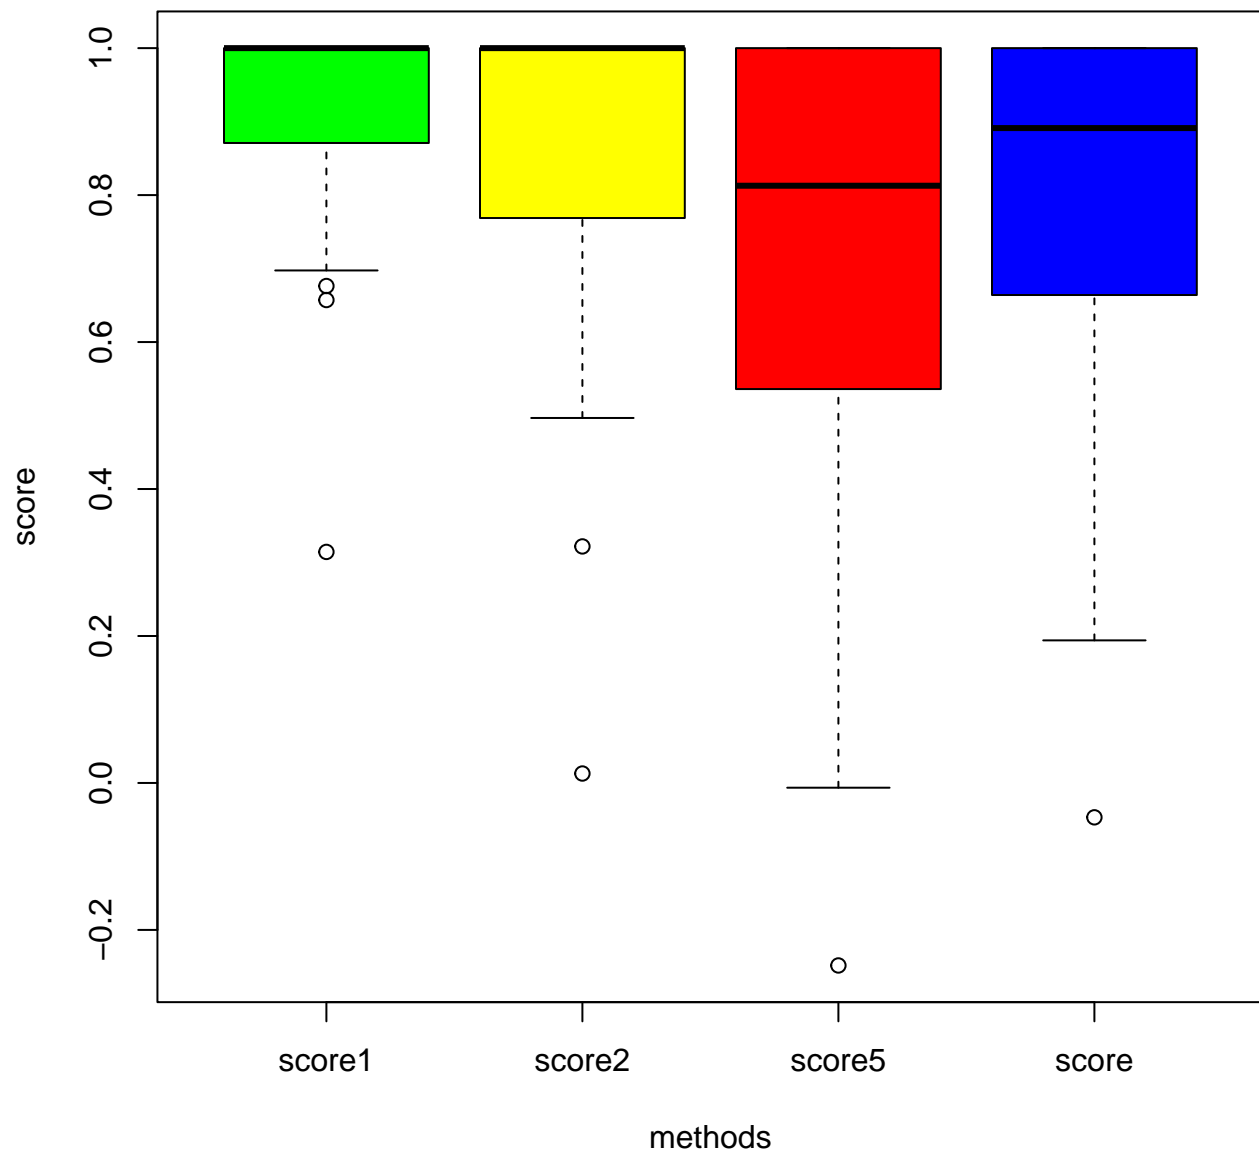

Supplement: s1 [file s1]

# brain cancer\_stability analysis

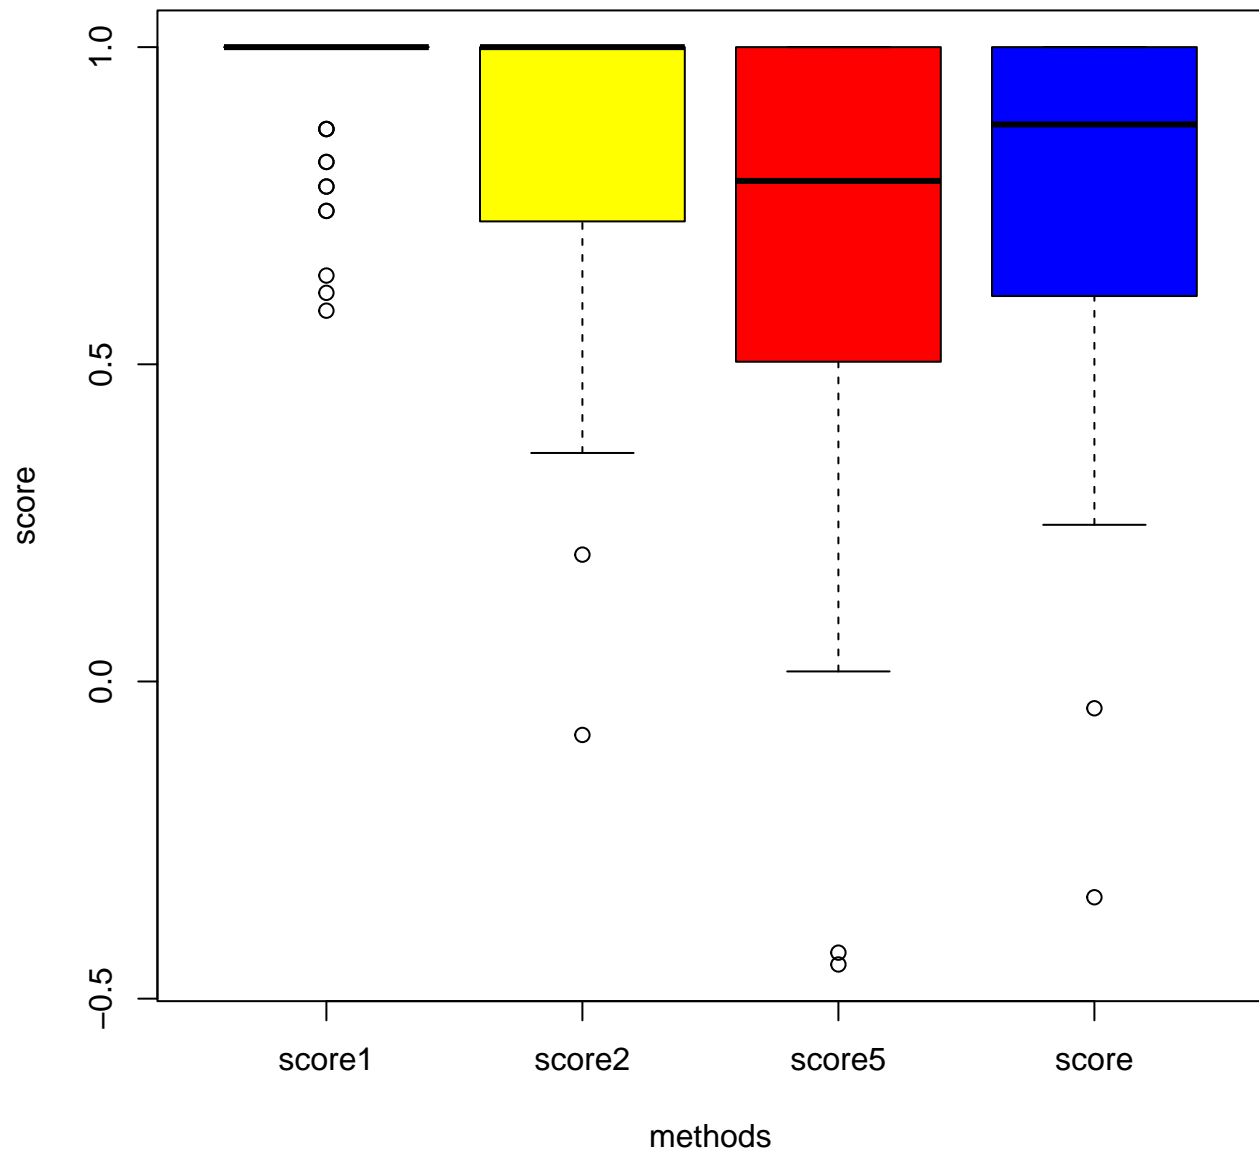

Supplement: s1 [file s1]

# arteriosclerosis\_stability analysis

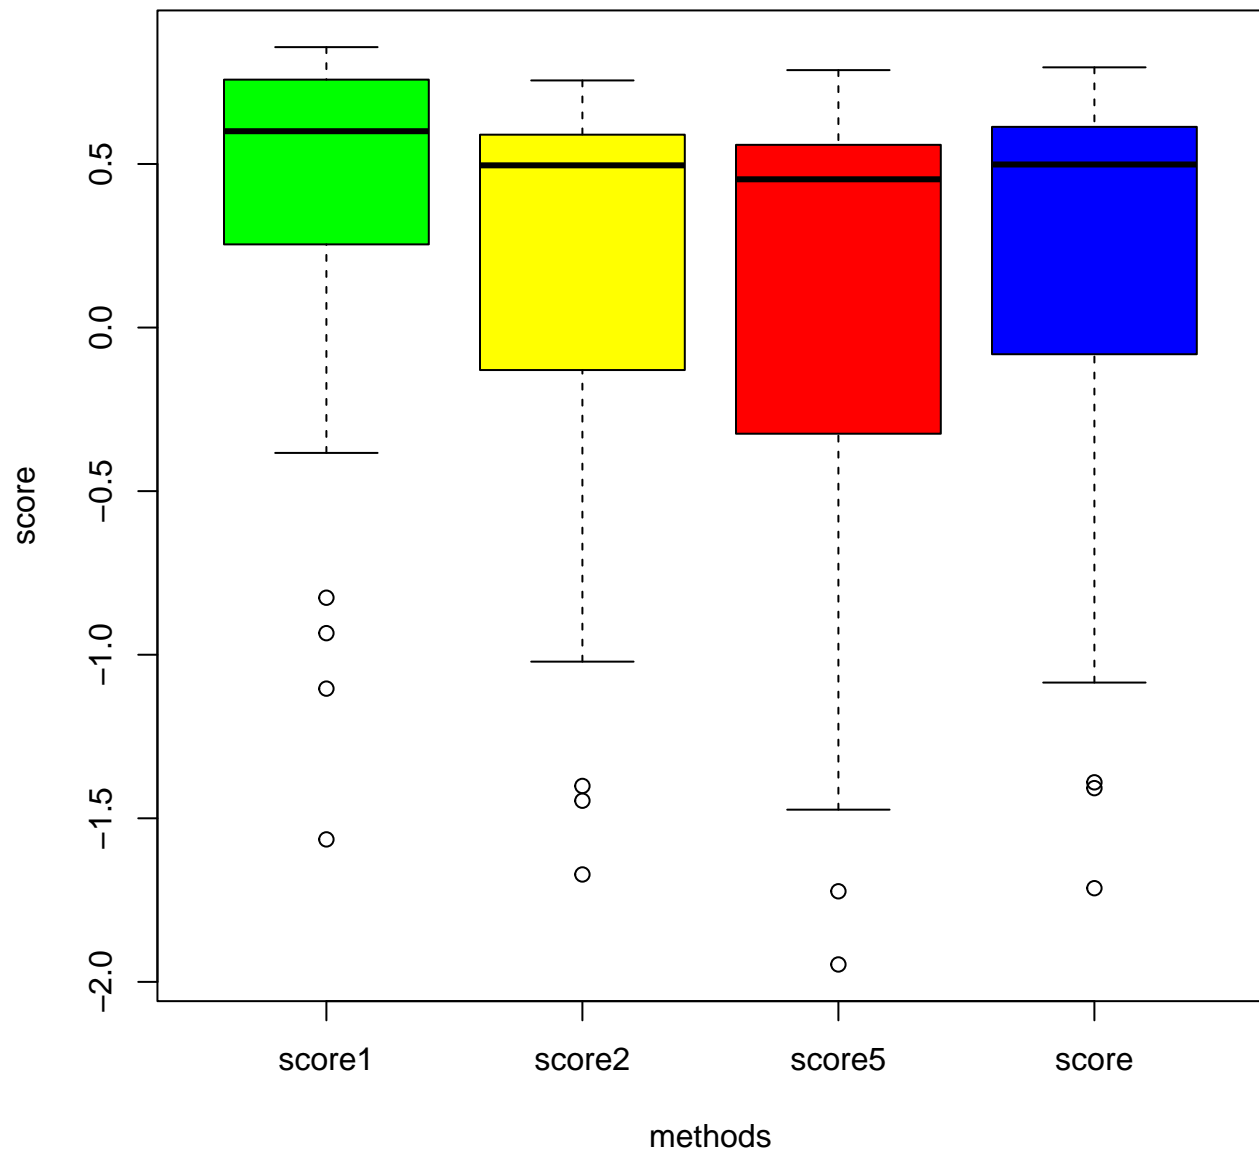

Supplement: s1 [file s1]

## Behcet's disease\_stability analysis

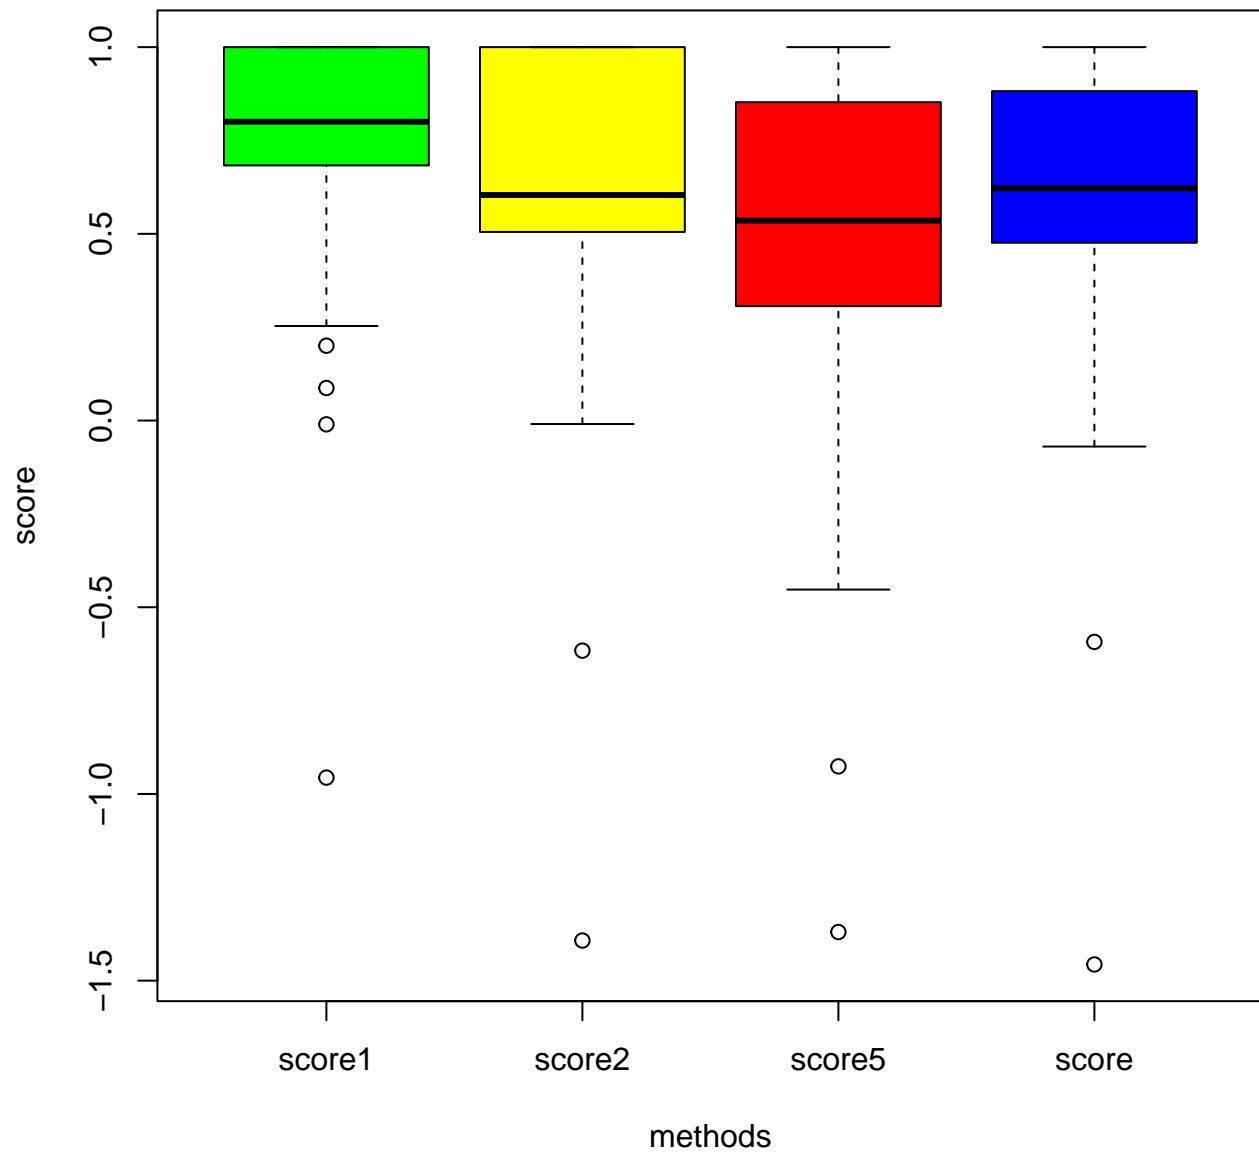

Supplement: s1 [file s1]

# coronary artery vasospasm\_stability analysis

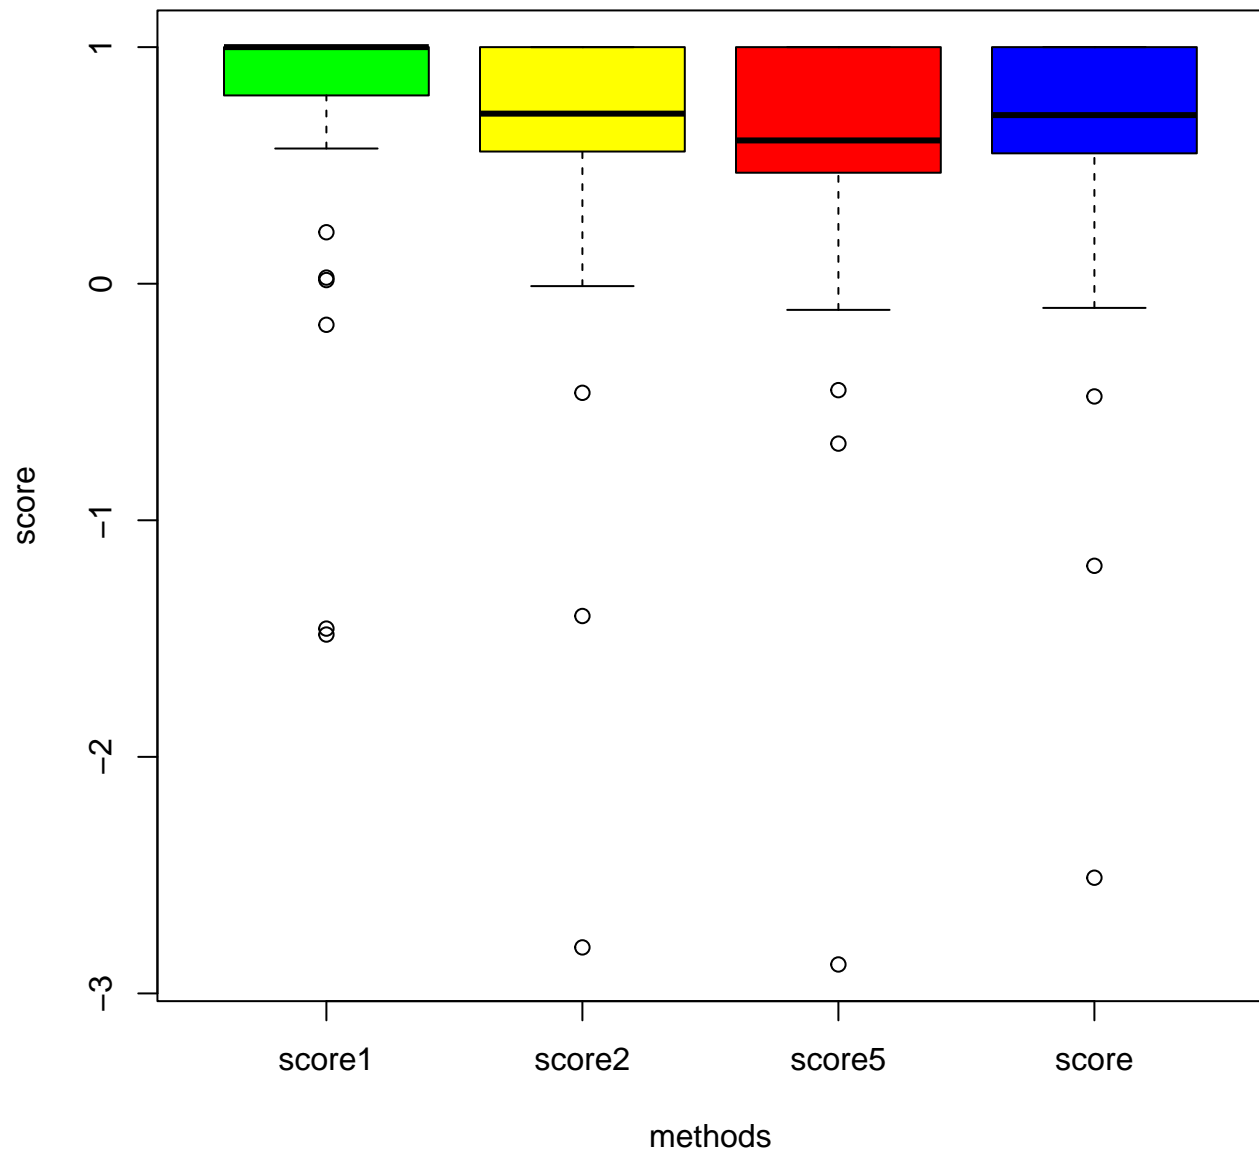

Supplement: s1 [file s1]

## Kawasaki disease\_stability analysis

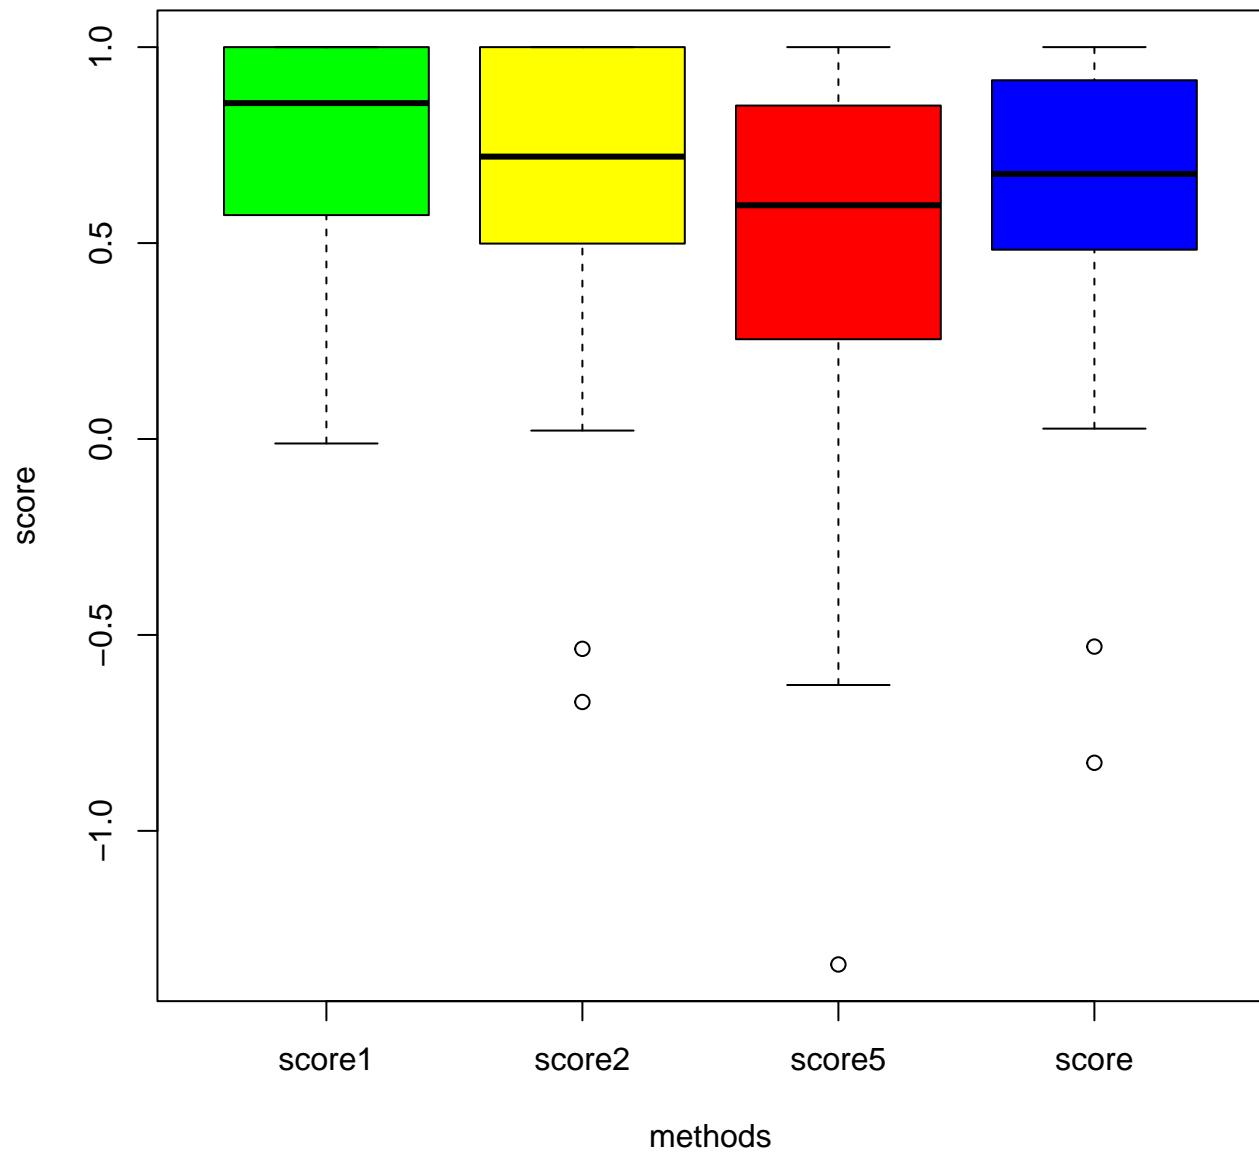

Supplement: s1 [file s1]

# transient cerebral ischemia\_stability analysis

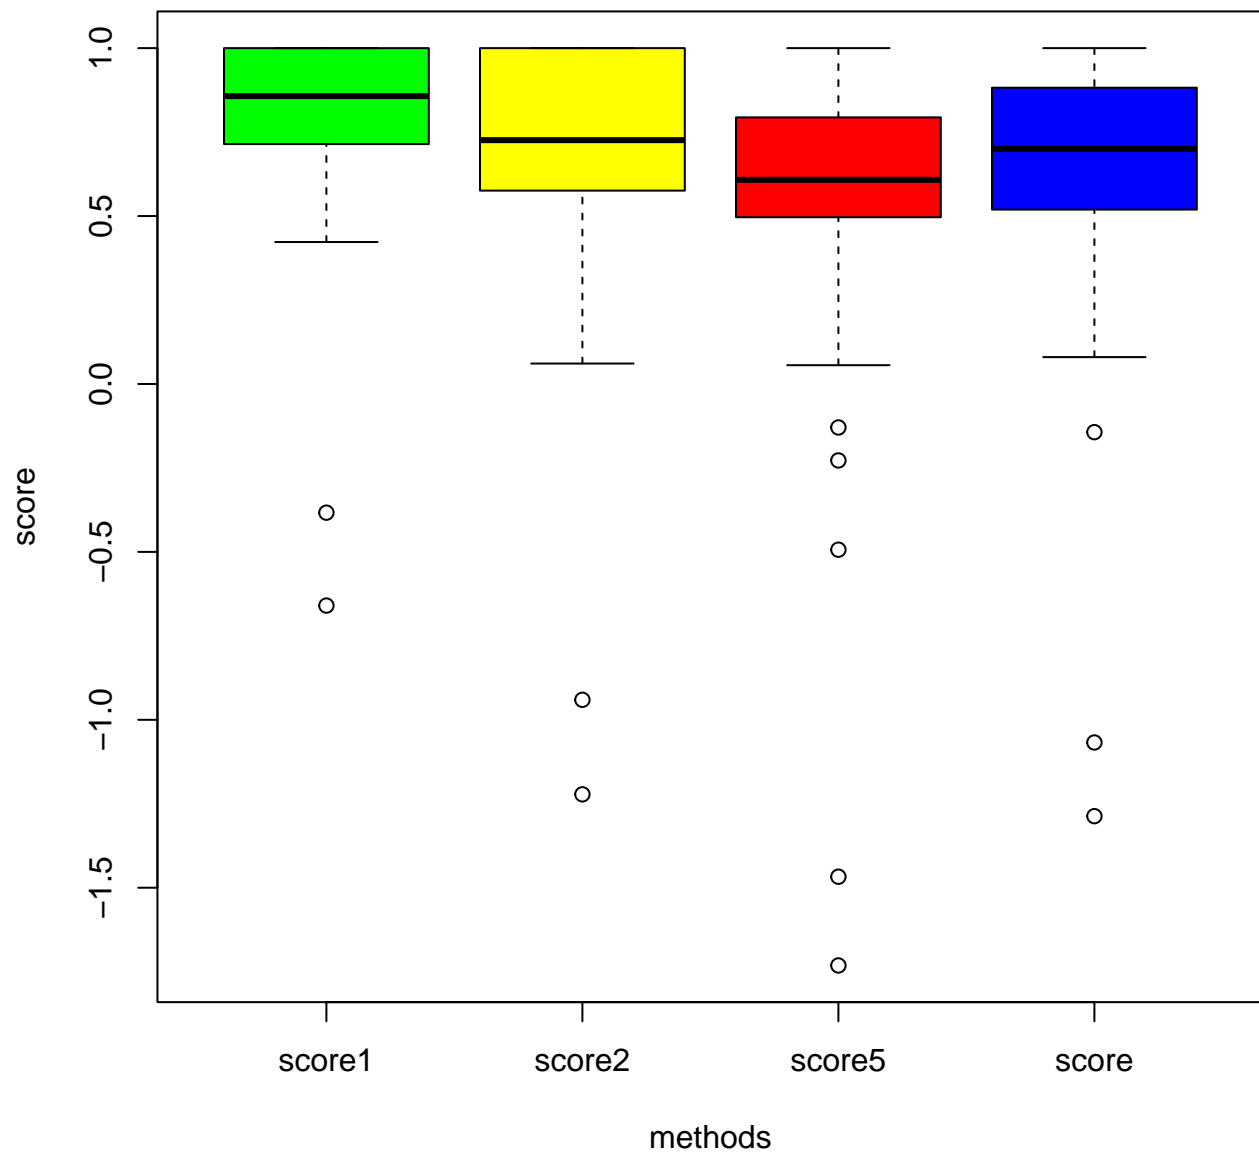

Supplement: s1 [file s1]

# pseudoxanthoma elasticum\_stability analysis

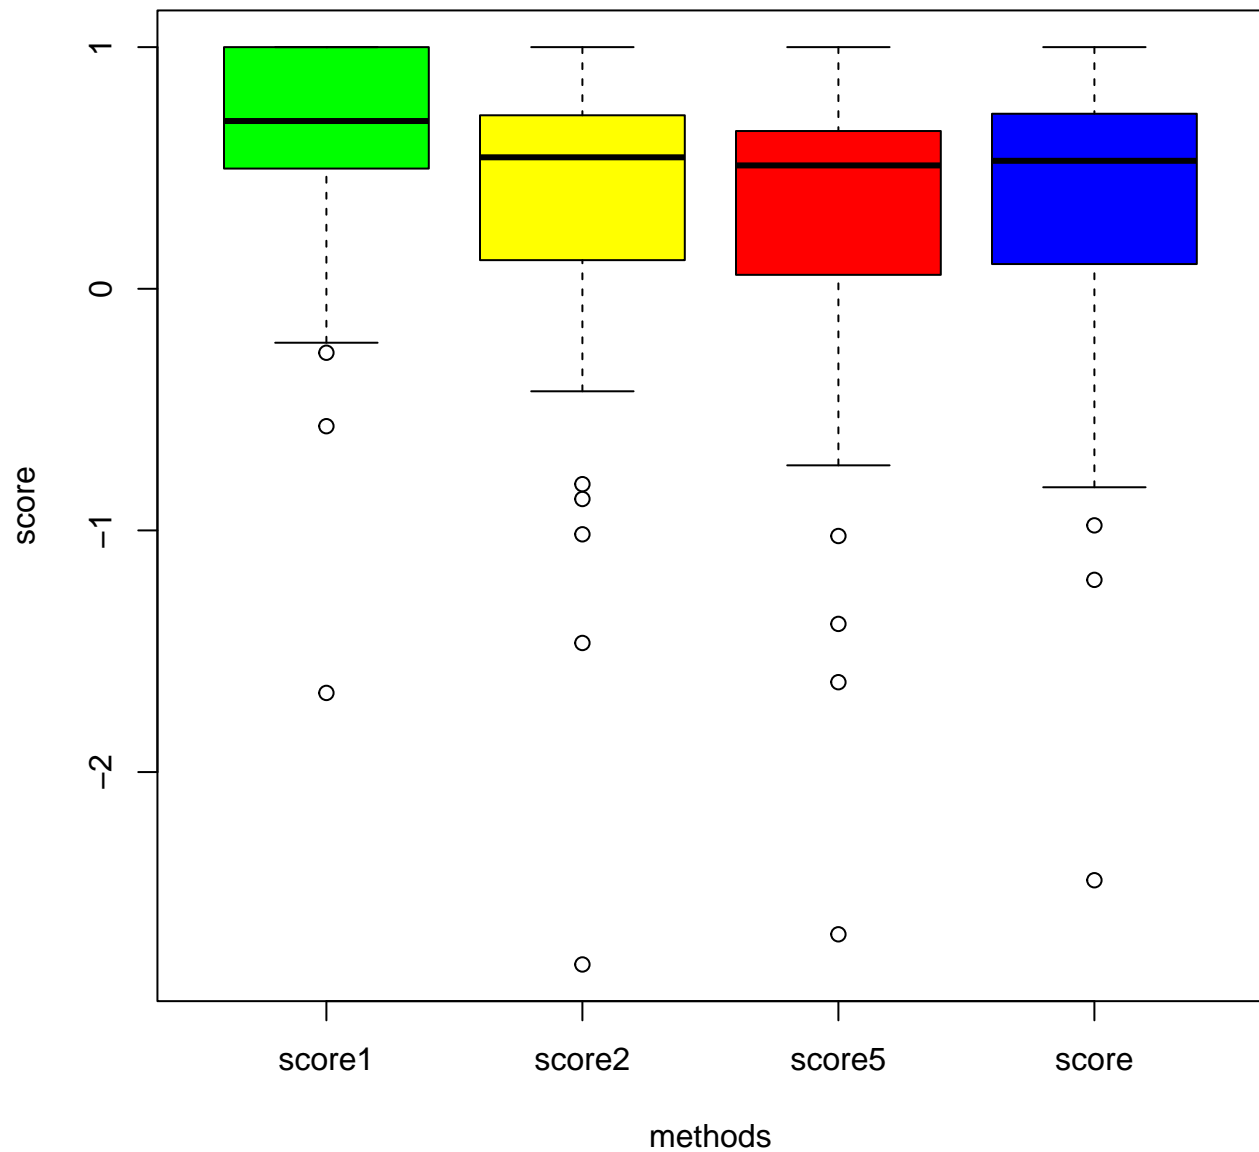

Supplement: s1 [file s1]

# pancreatic carcinoma\_stability analysis

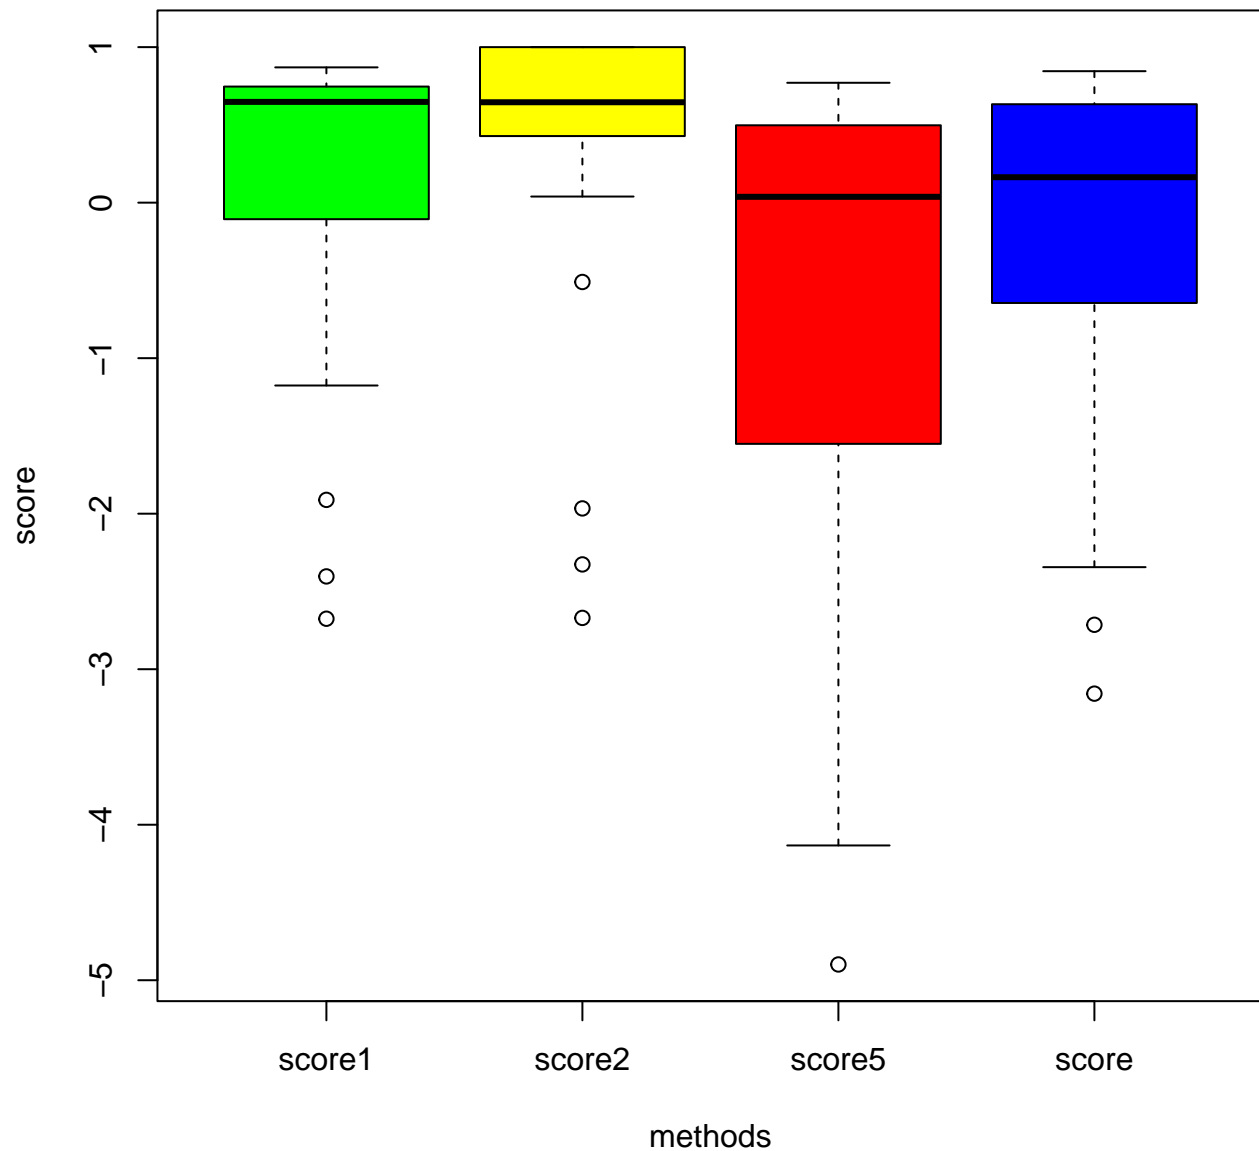

Supplement: s1 [file s1]

# atherosclerosis\_stability analysis

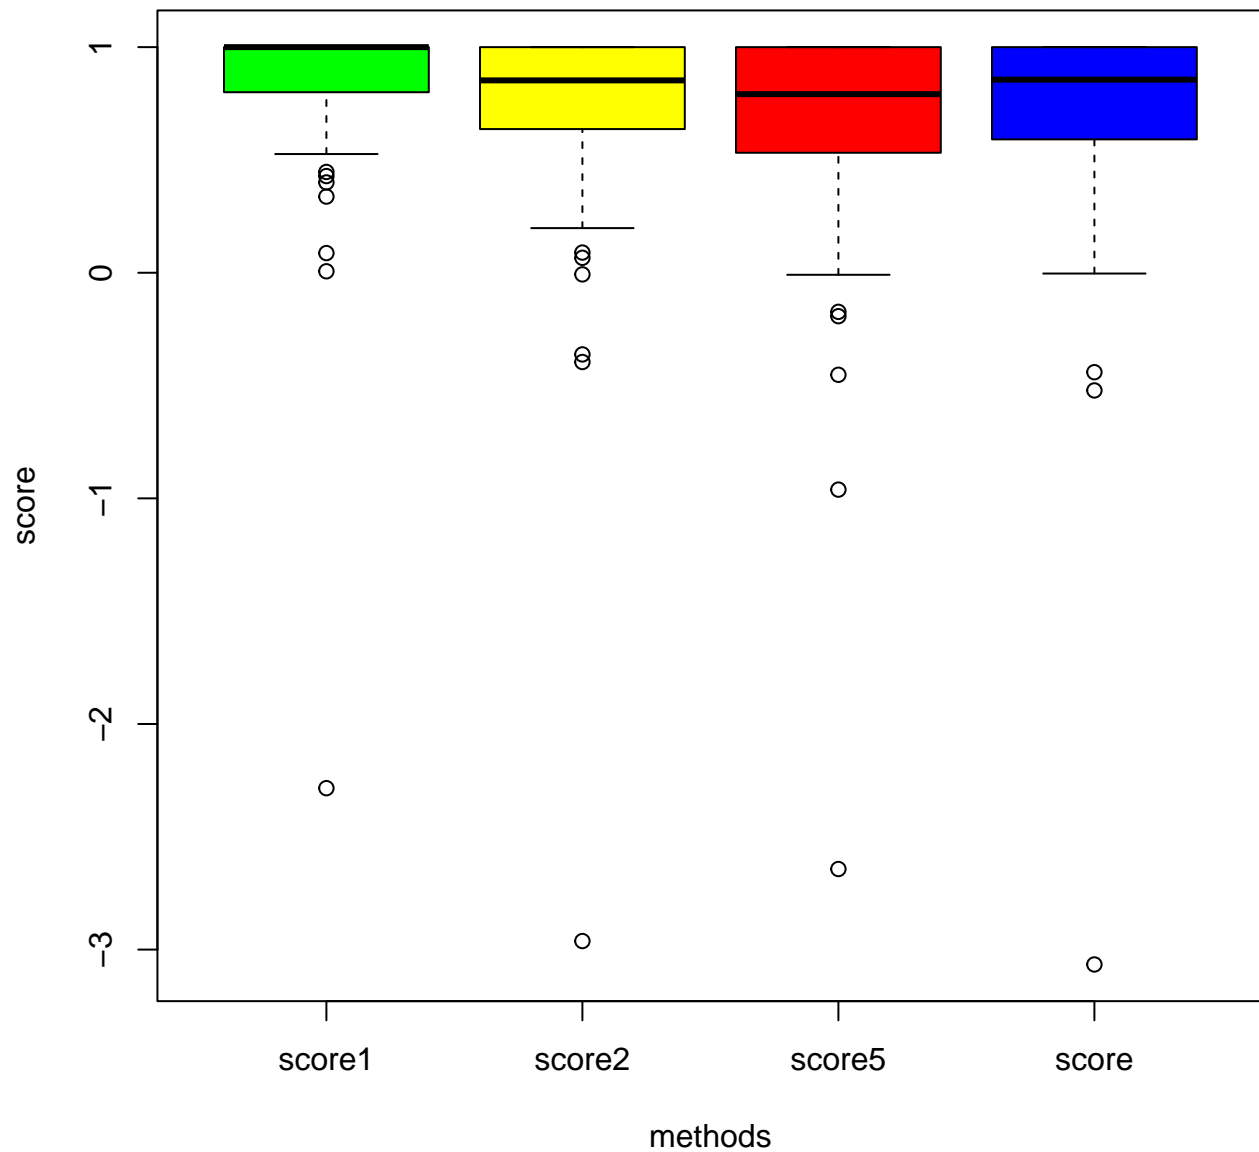

Supplement: s1 [file s1]

# pancreatic ductal carcinoma\_stability analysis

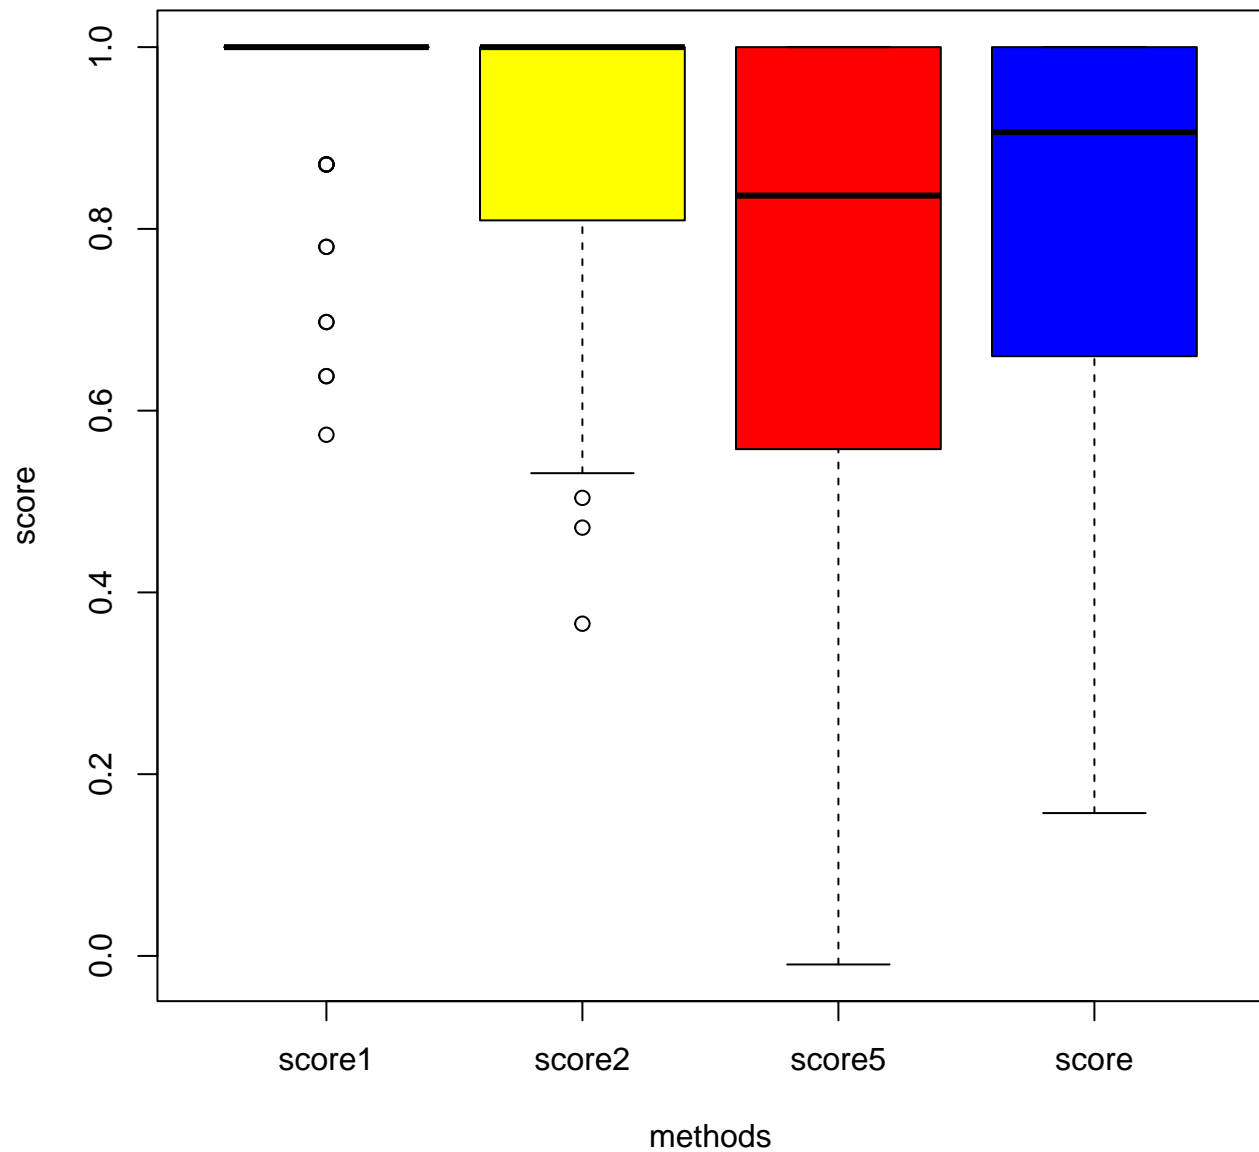

Supplement: s1 [file s1]

# aortic aneurysm\_stability analysis

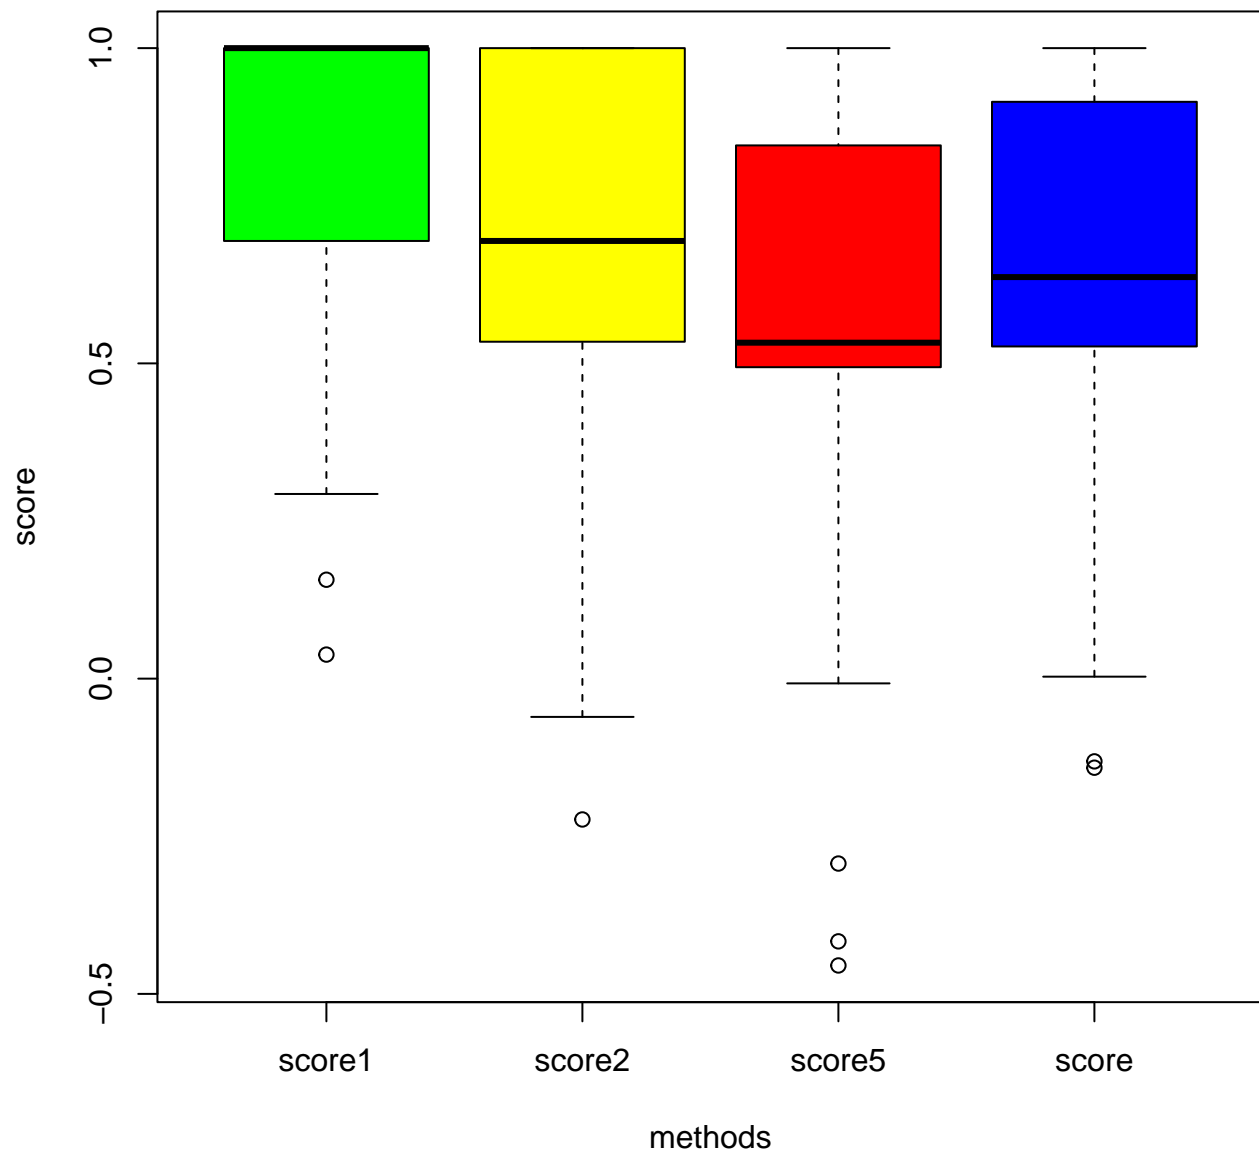

Supplement: s1 [file s1]

# intracranial aneurysm\_stability analysis

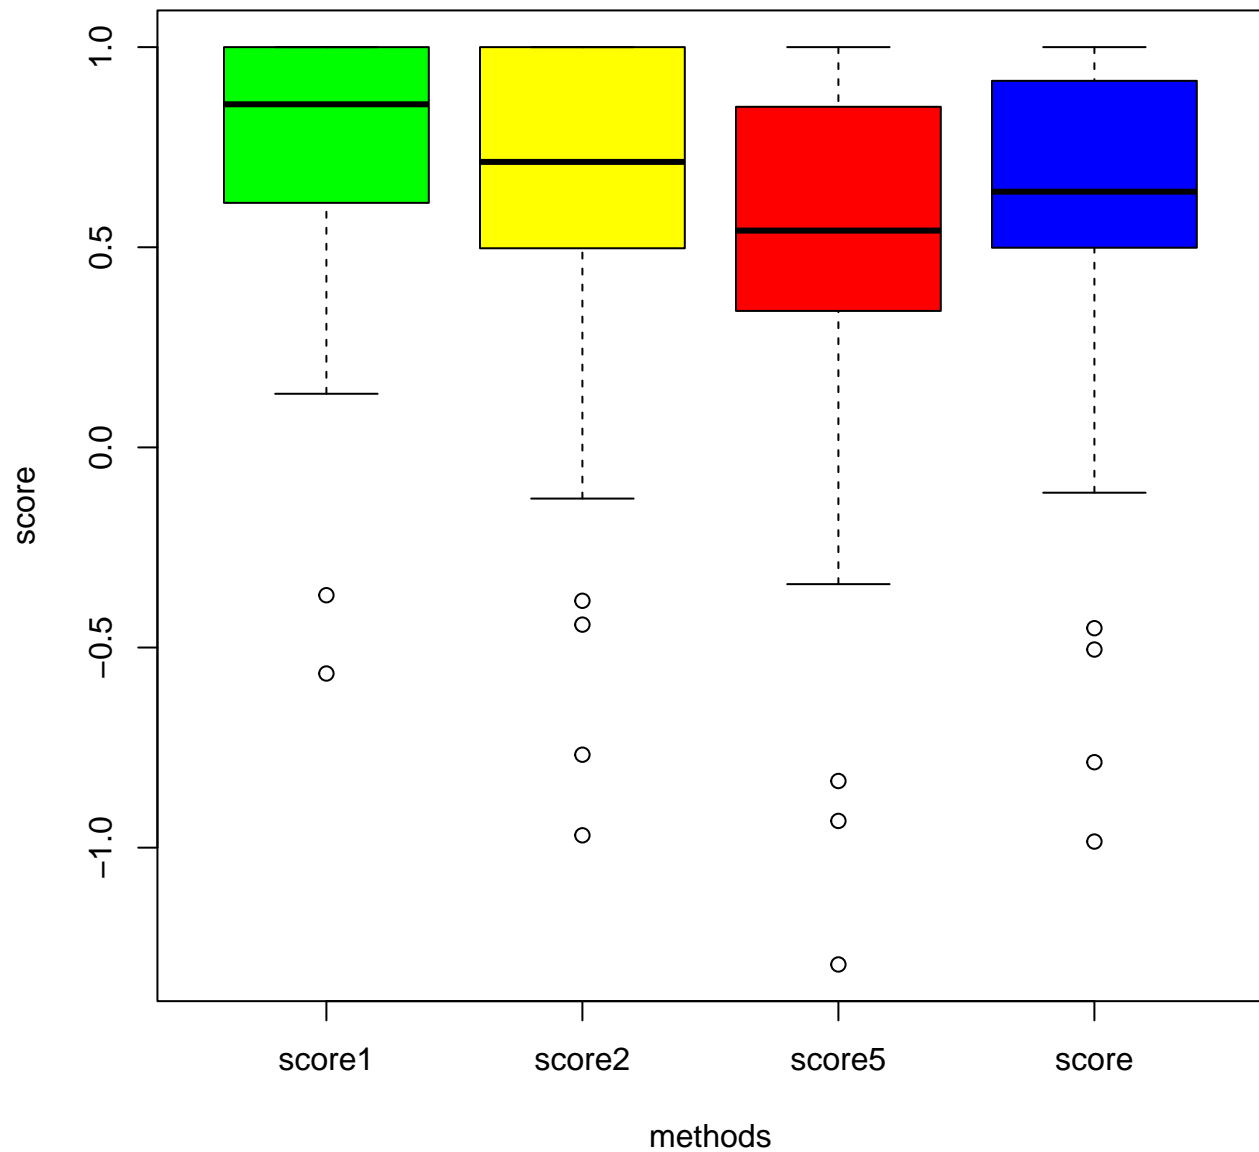

Supplement: s1 [file s1]

# cerebrovascular disease\_stability analysis

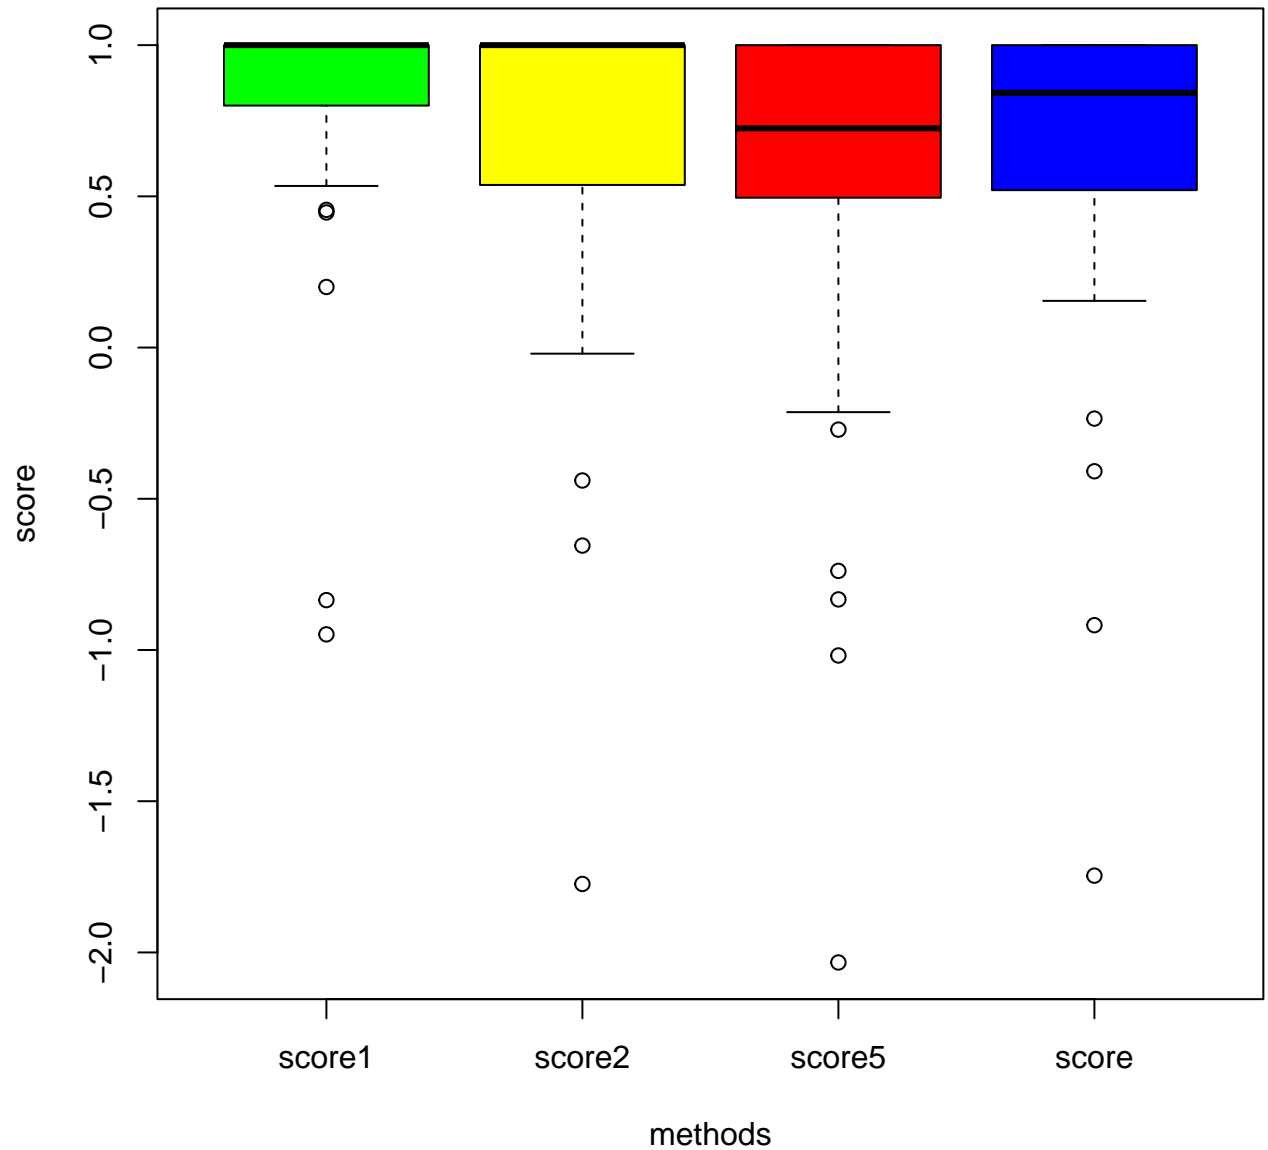

Supplement: s1 [file s1]

# bile duct cancer\_stability analysis

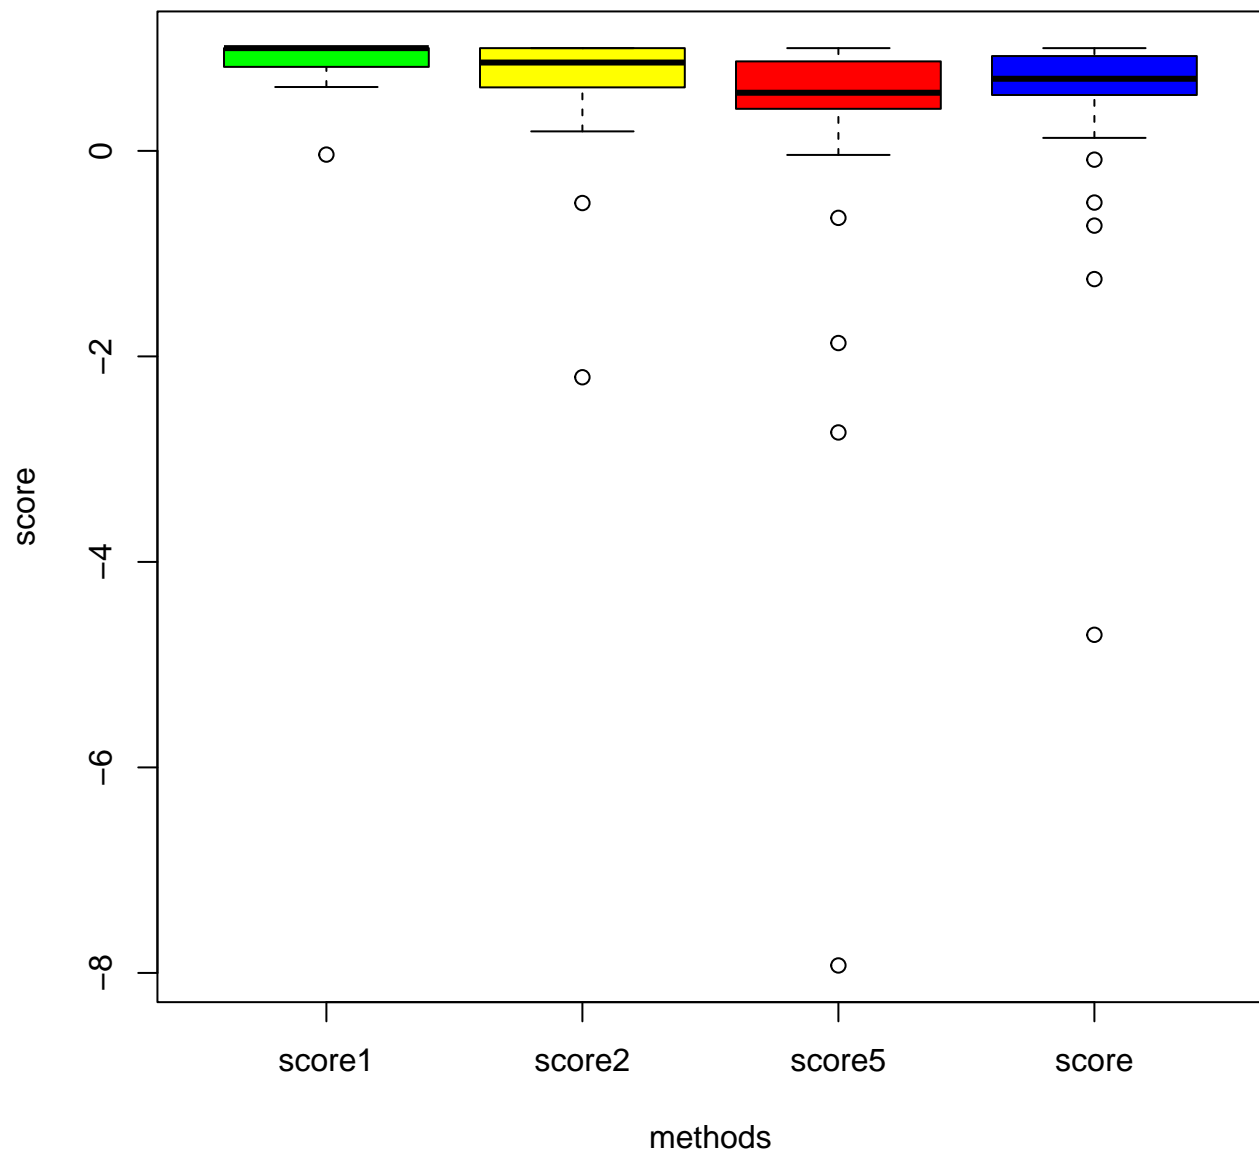

Supplement: s1 [file s1]

# connective tissue benign neoplasm\_stability analysis

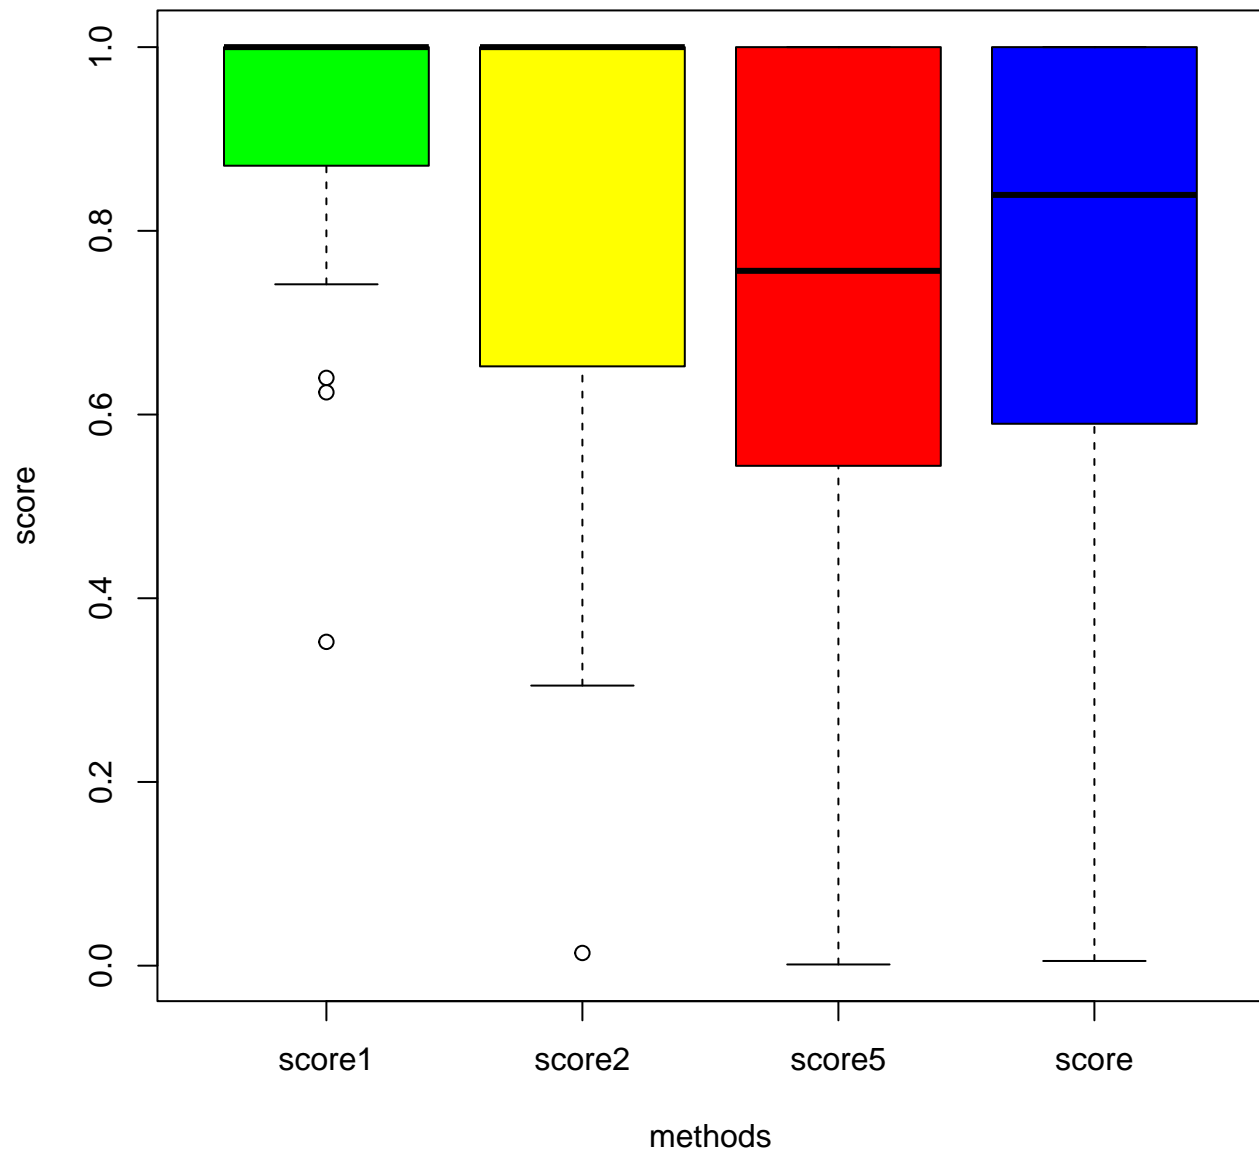

Supplement: s1 [file s1]

# female reproductive organ cancer\_stability analysis

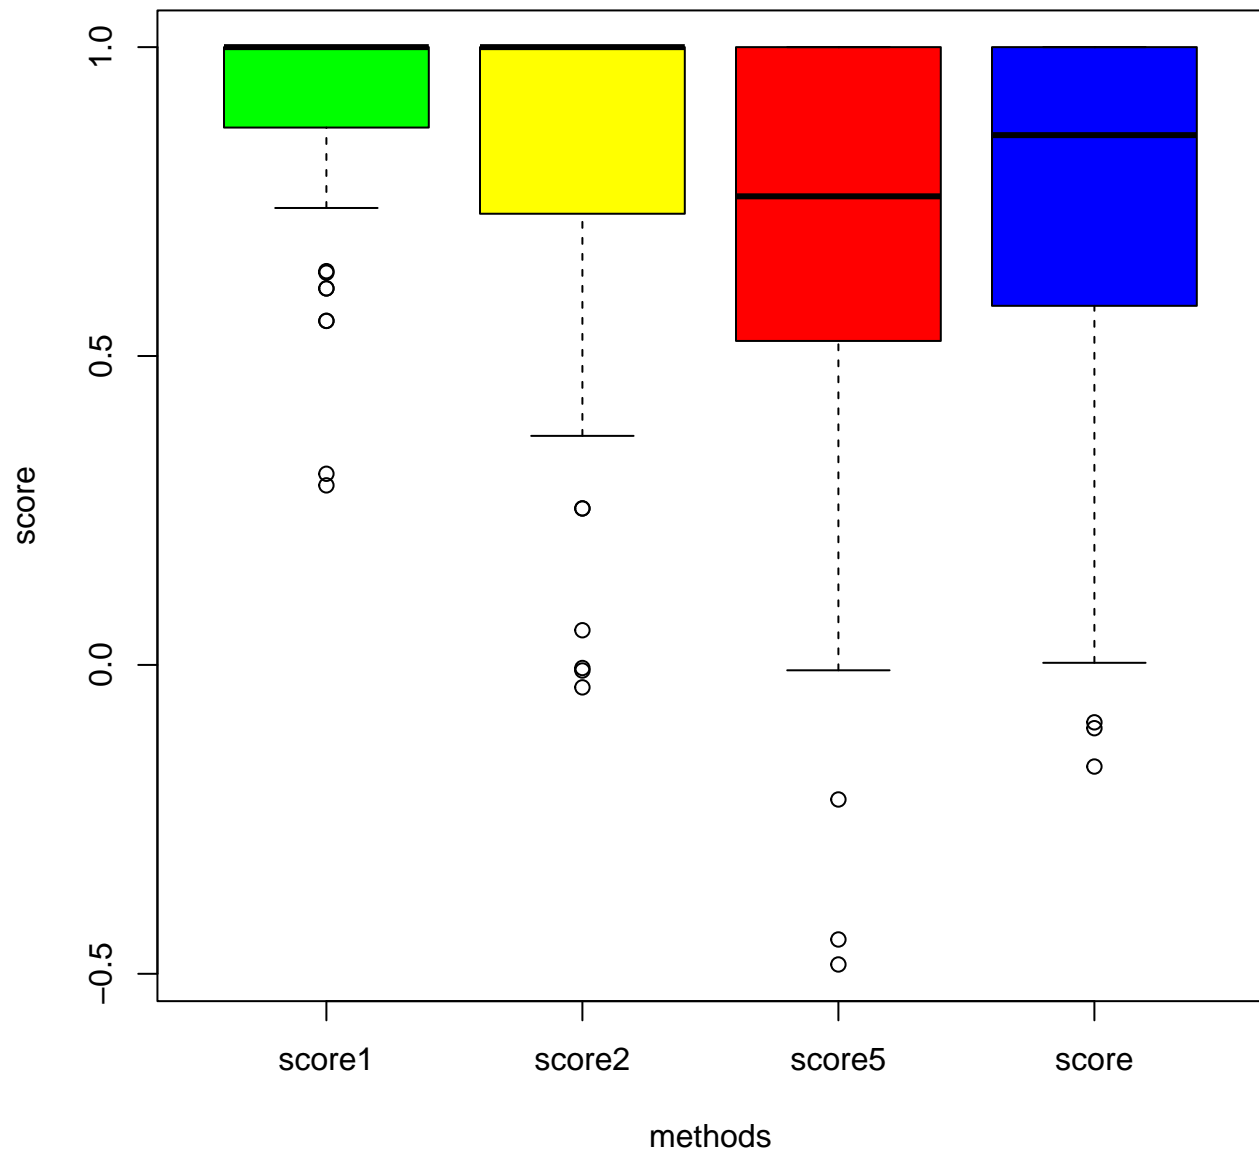

Supplement: s1 [file s1]

# kidney cancer\_stability analysis

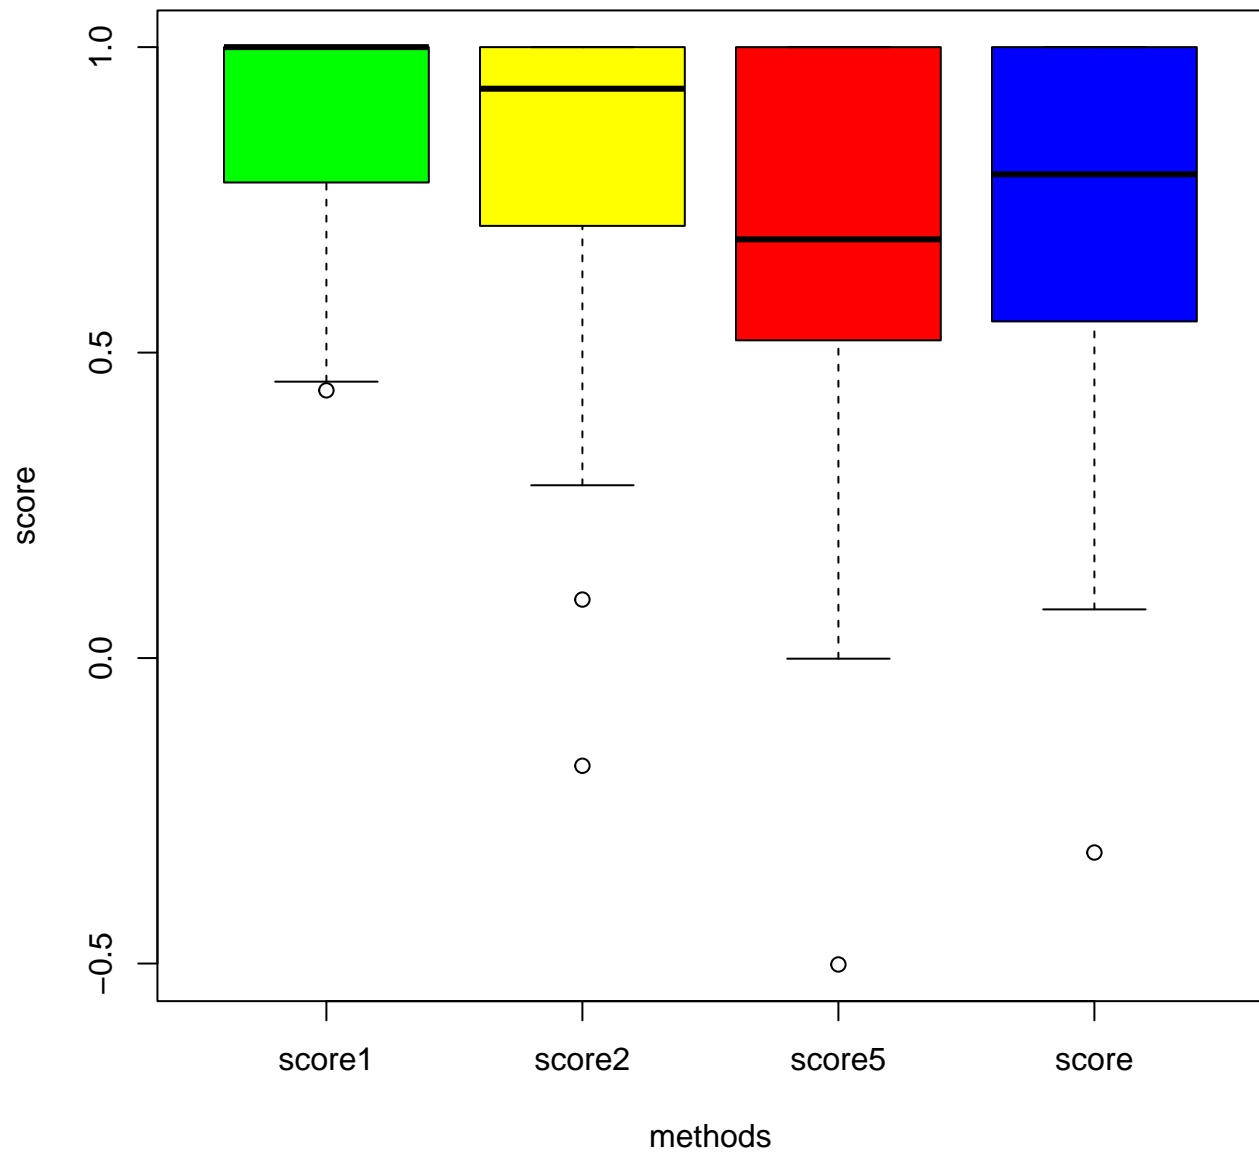

Supplement: s1 [file s1]

# coronary thrombosis\_stability analysis

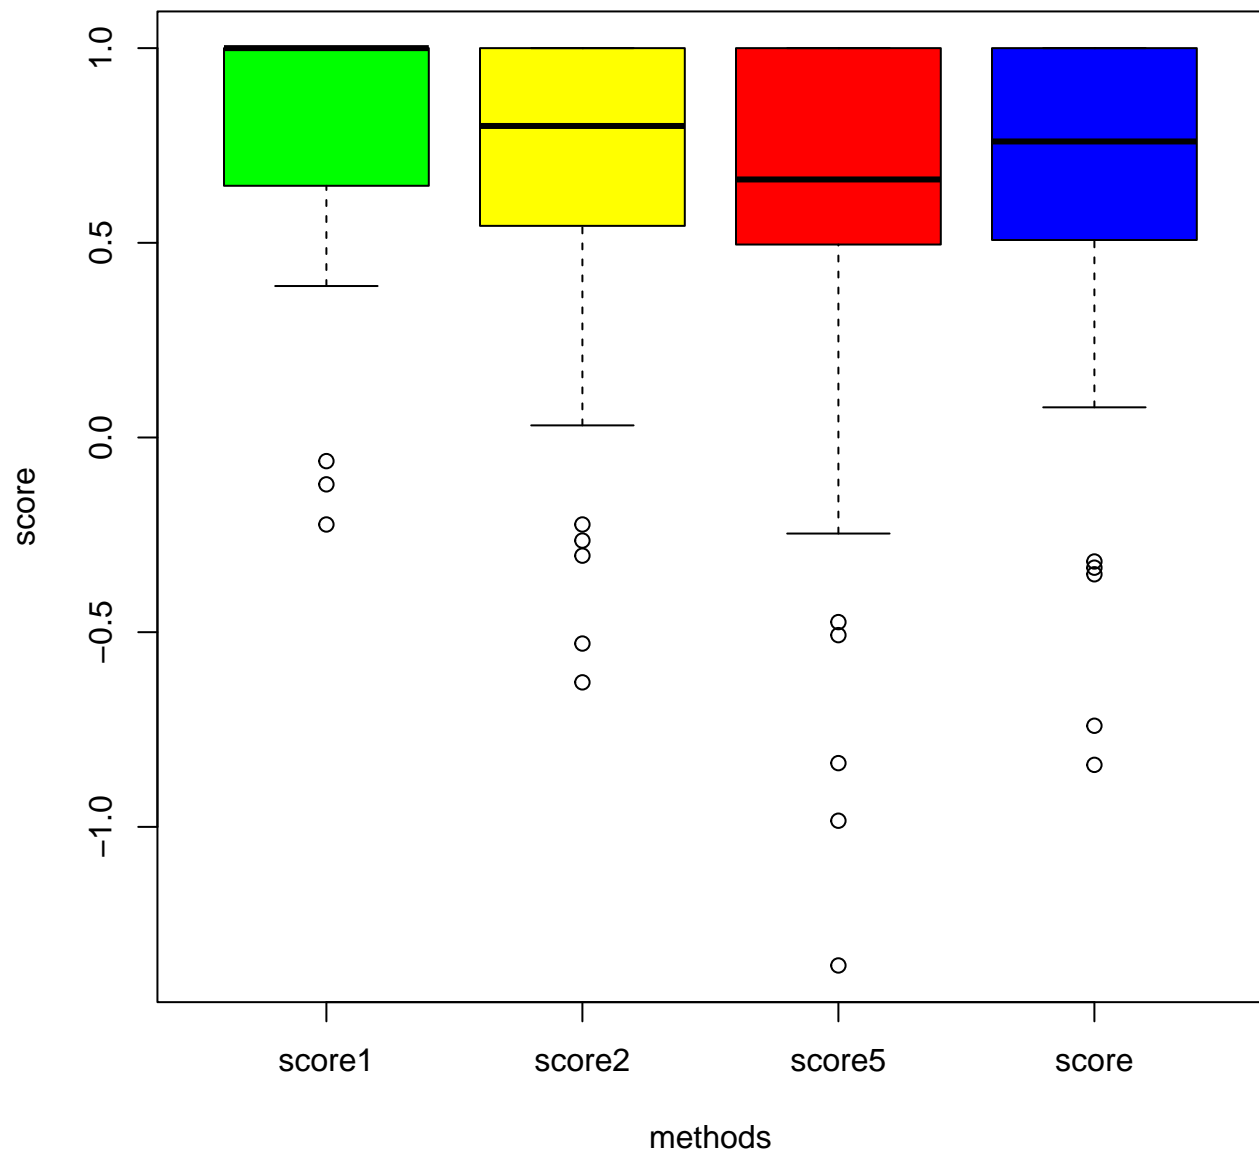

Supplement: s1 [file s1]

# prolactinoma\_stability analysis

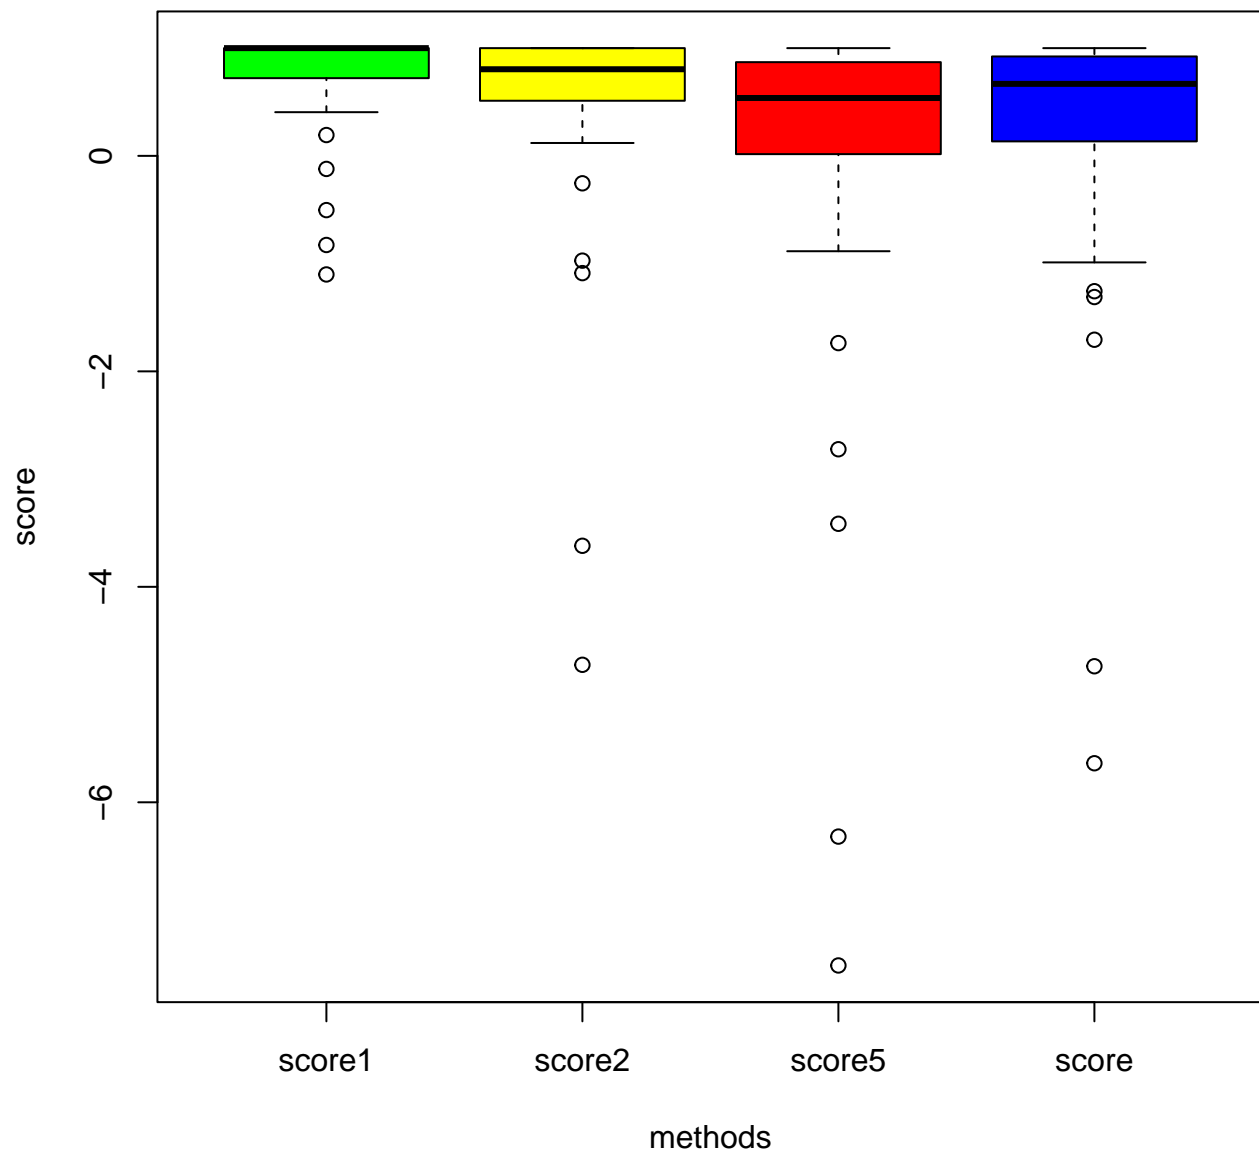

Supplement: s1 [file s1]

# thyroid medullary carcinoma\_stability analysis

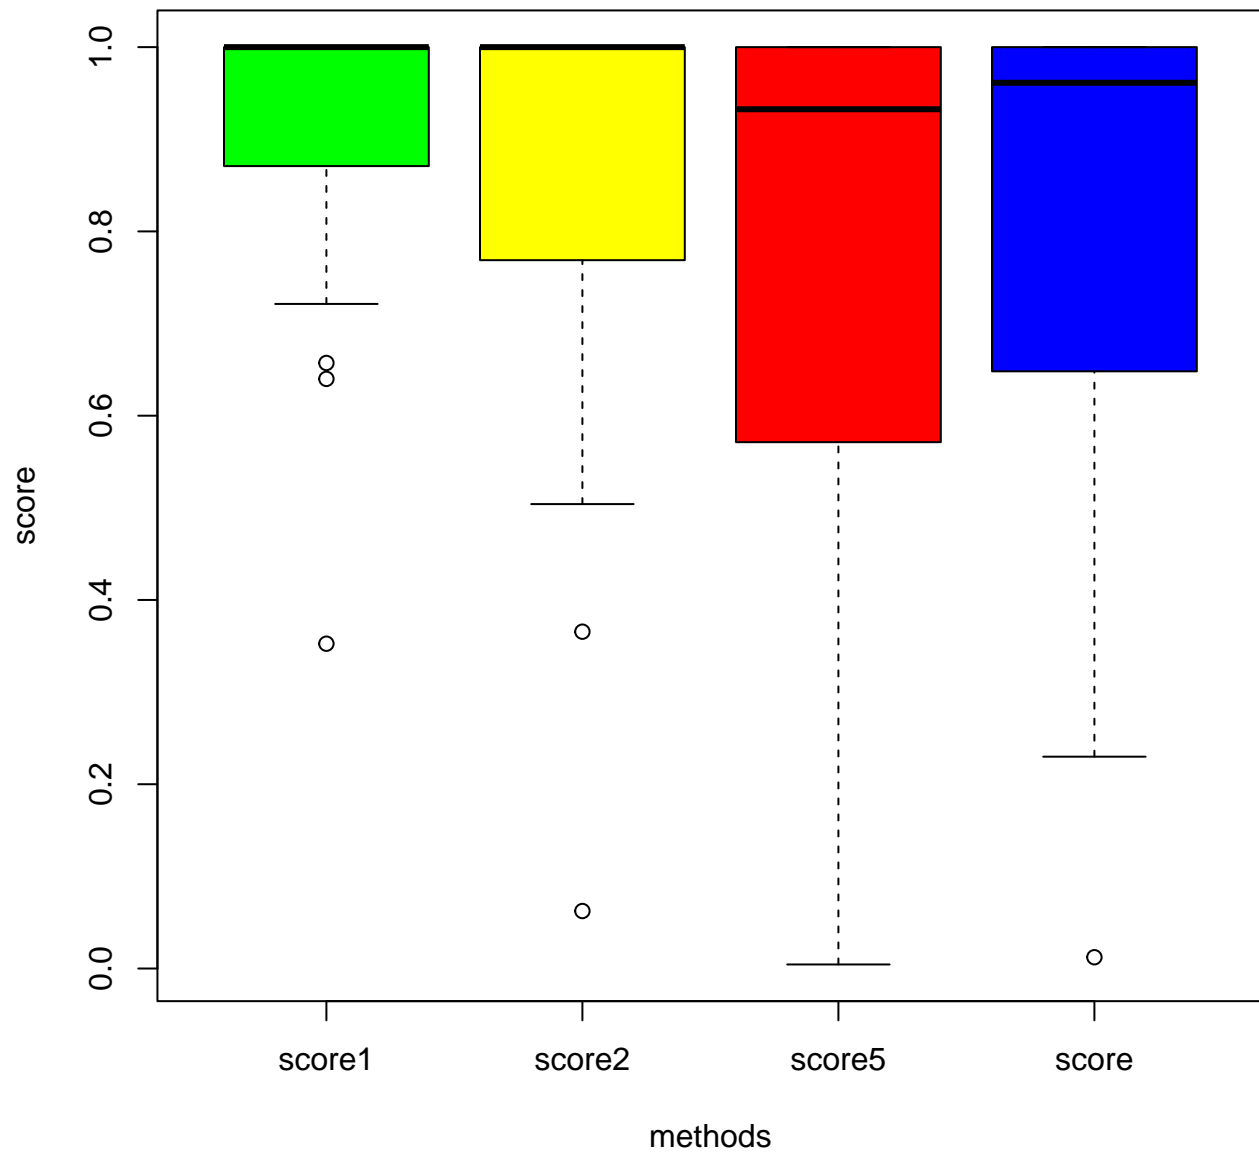

Supplement: s1 [file s1]

# urinary bladder cancer\_stability analysis

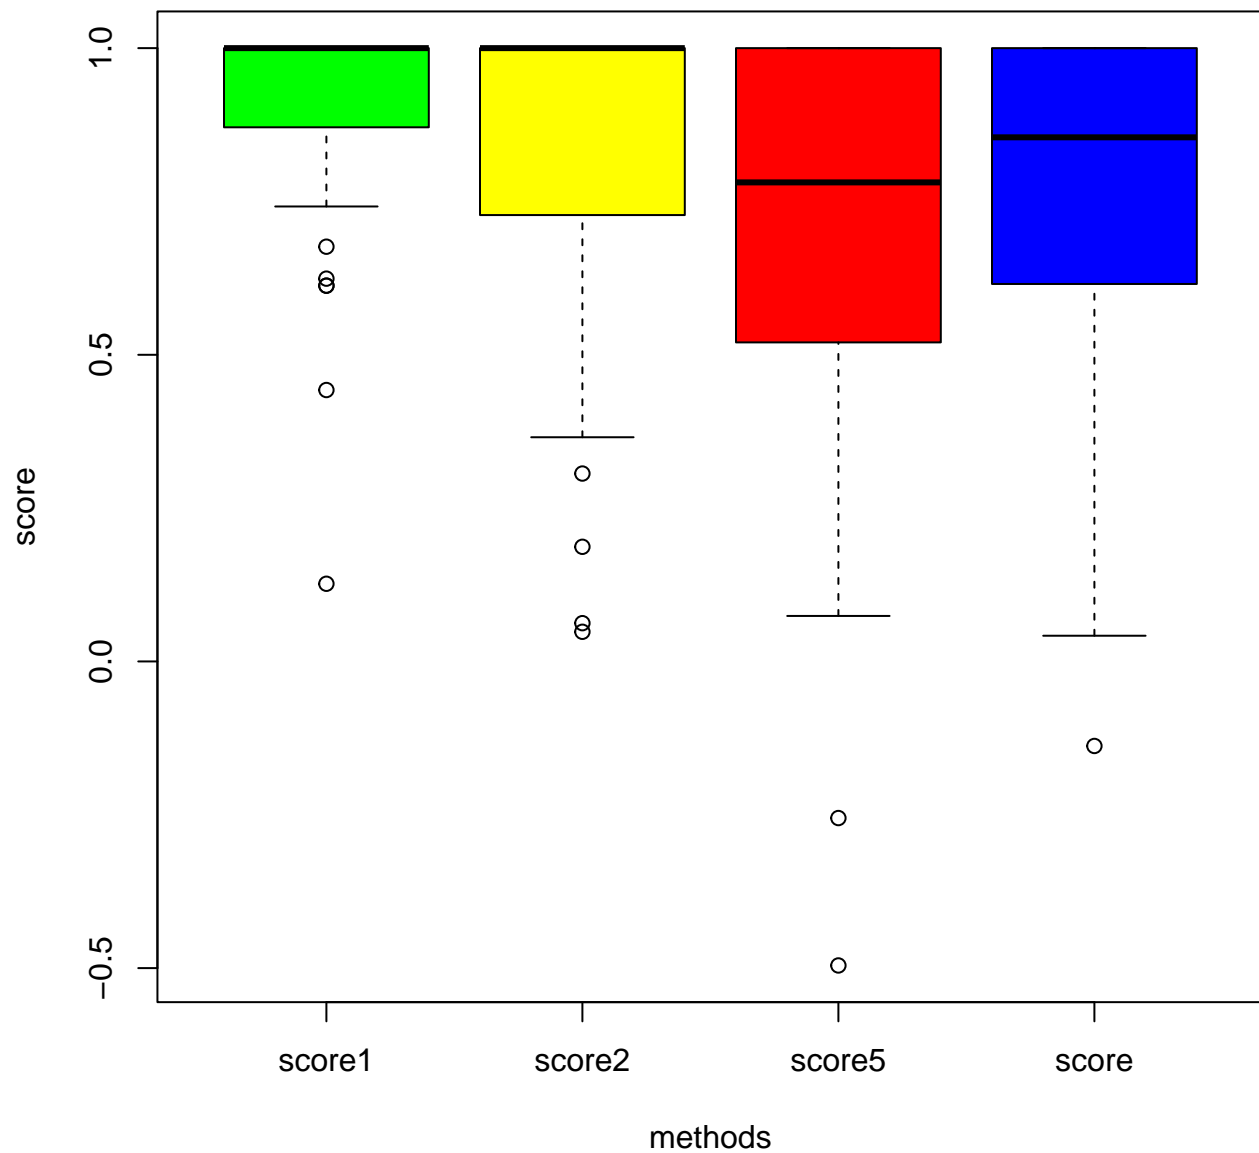

Supplement: s1 [file s1]
