# Supplementary figures and images for: DDCM: A Computational Strategy for Drug Repositioning Based on Support-Vector Regression Algorithm (part 2 of 2)
Source: MDPI journal article supplement (doi:10.3390/ijms25105267), 2024-05-12

# peripheral vascular disease\_stability analysis

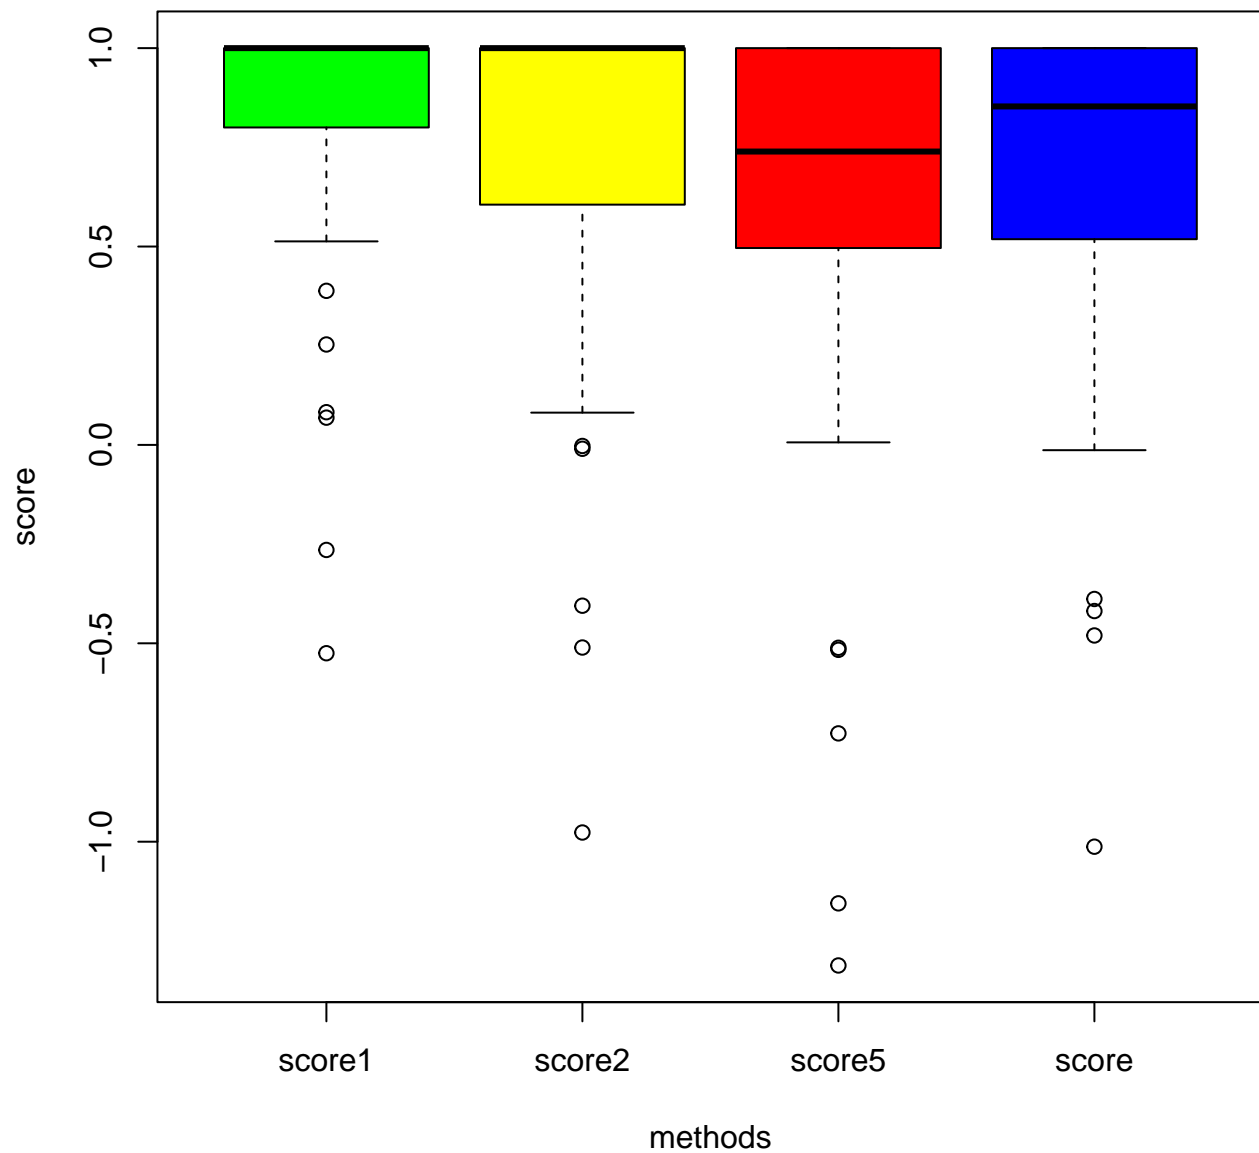

Supplement: s1 [file s1]

# stomach cancer\_stability analysis

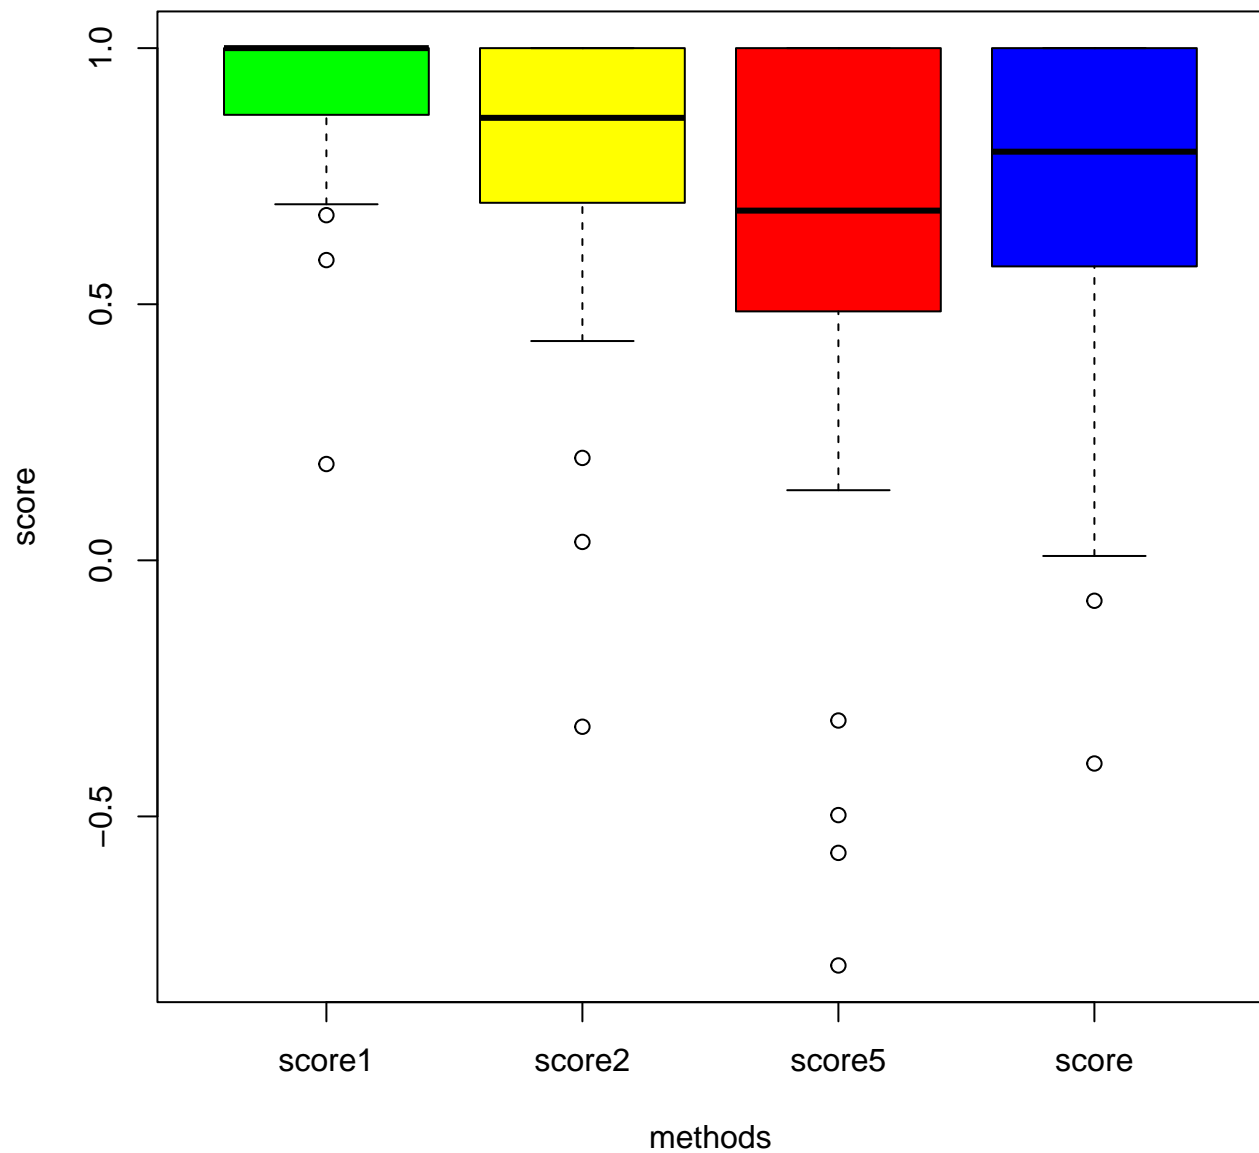

Supplement: s1 [file s1]

# myocardial infarction\_stability analysis

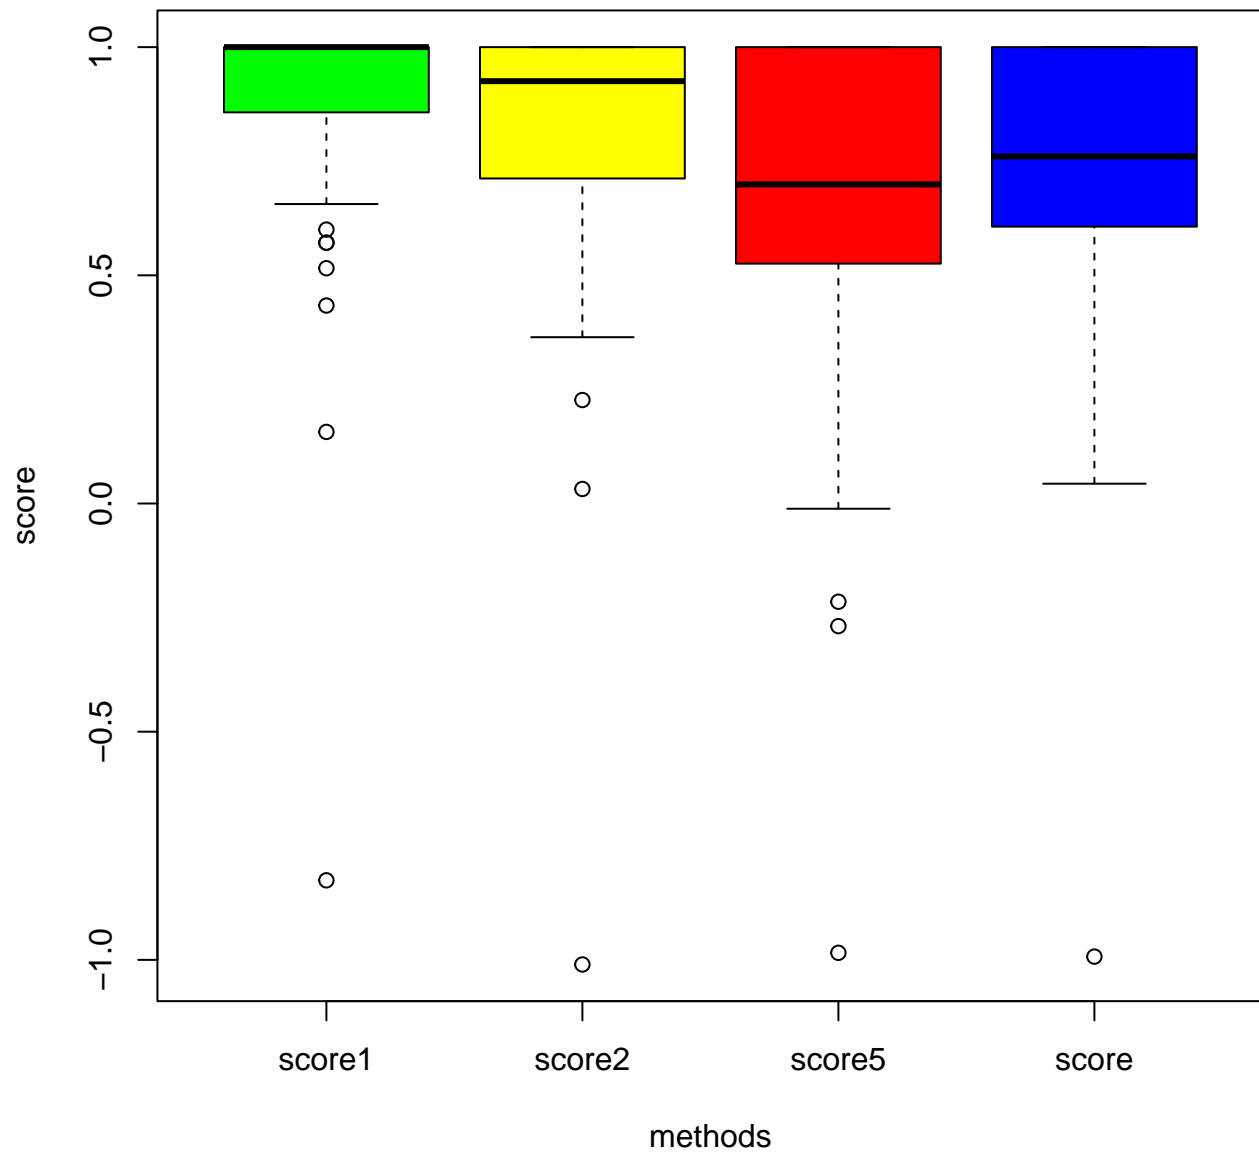

Supplement: s1 [file s1]

# endometrial carcinoma\_stability analysis

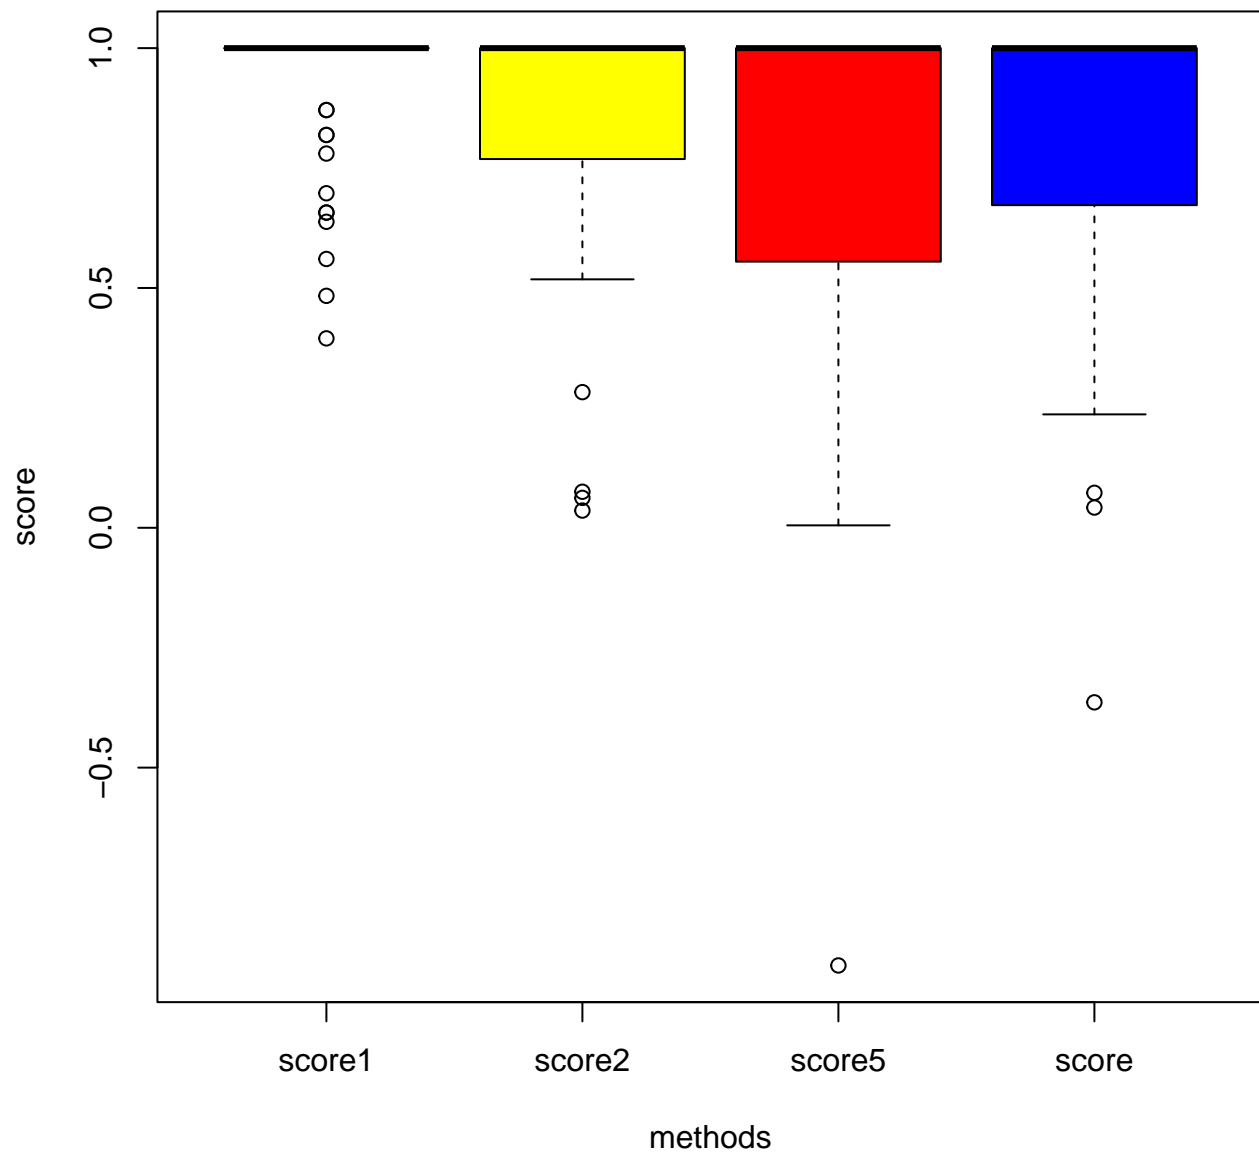

Supplement: s1 [file s1]

# supratentorial cancer\_stability analysis

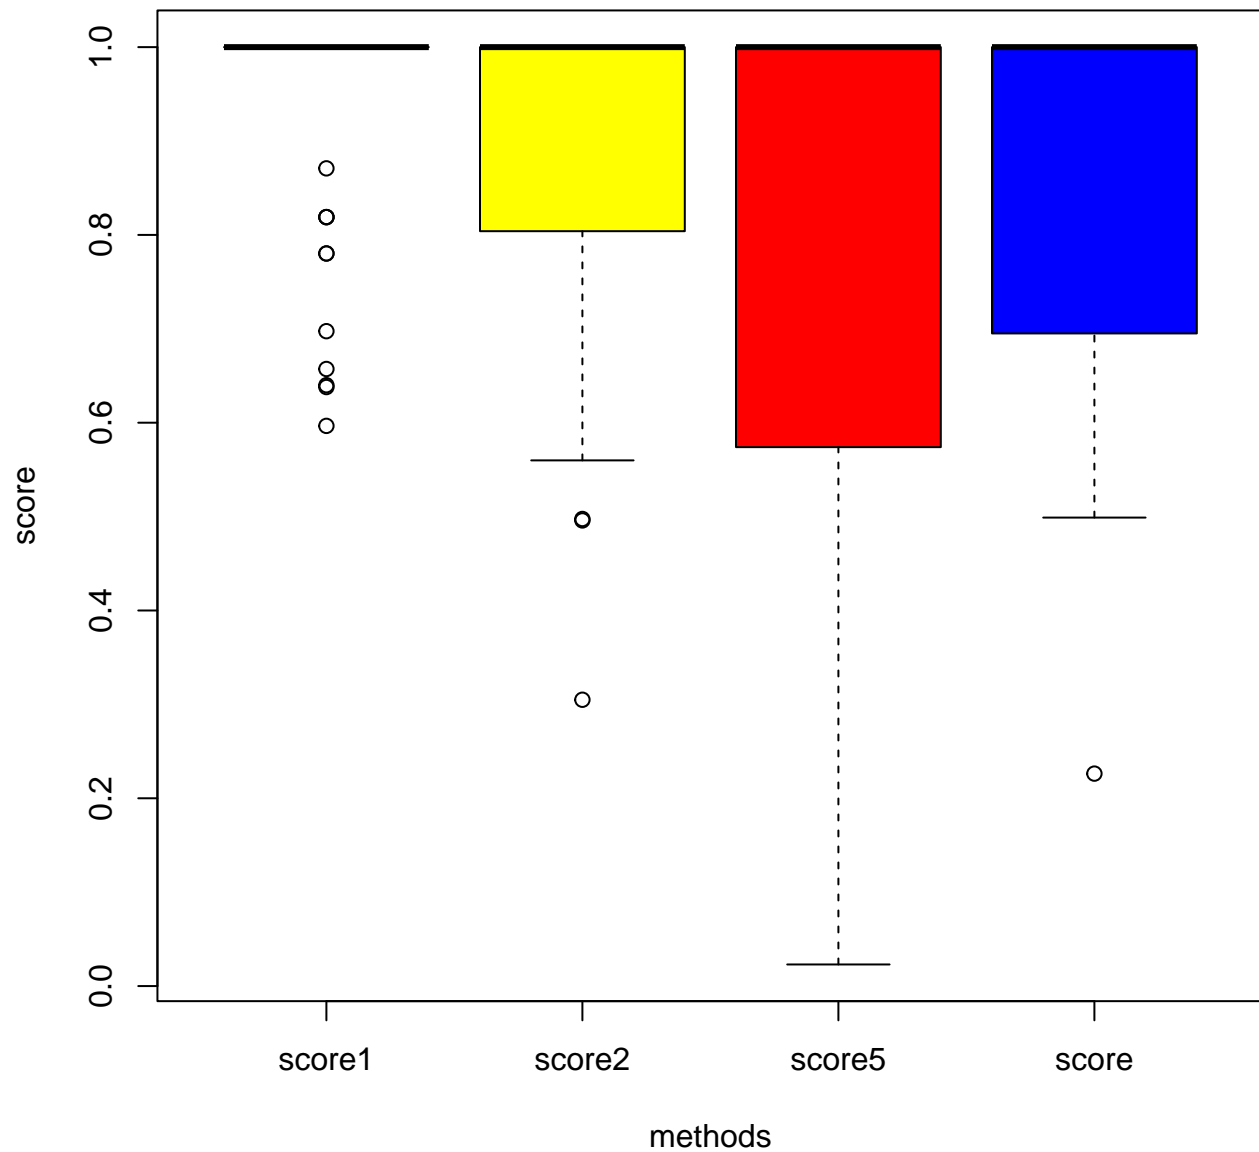

Supplement: s1 [file s1]

# growth hormone secreting pituitary adenoma\_stability analysis

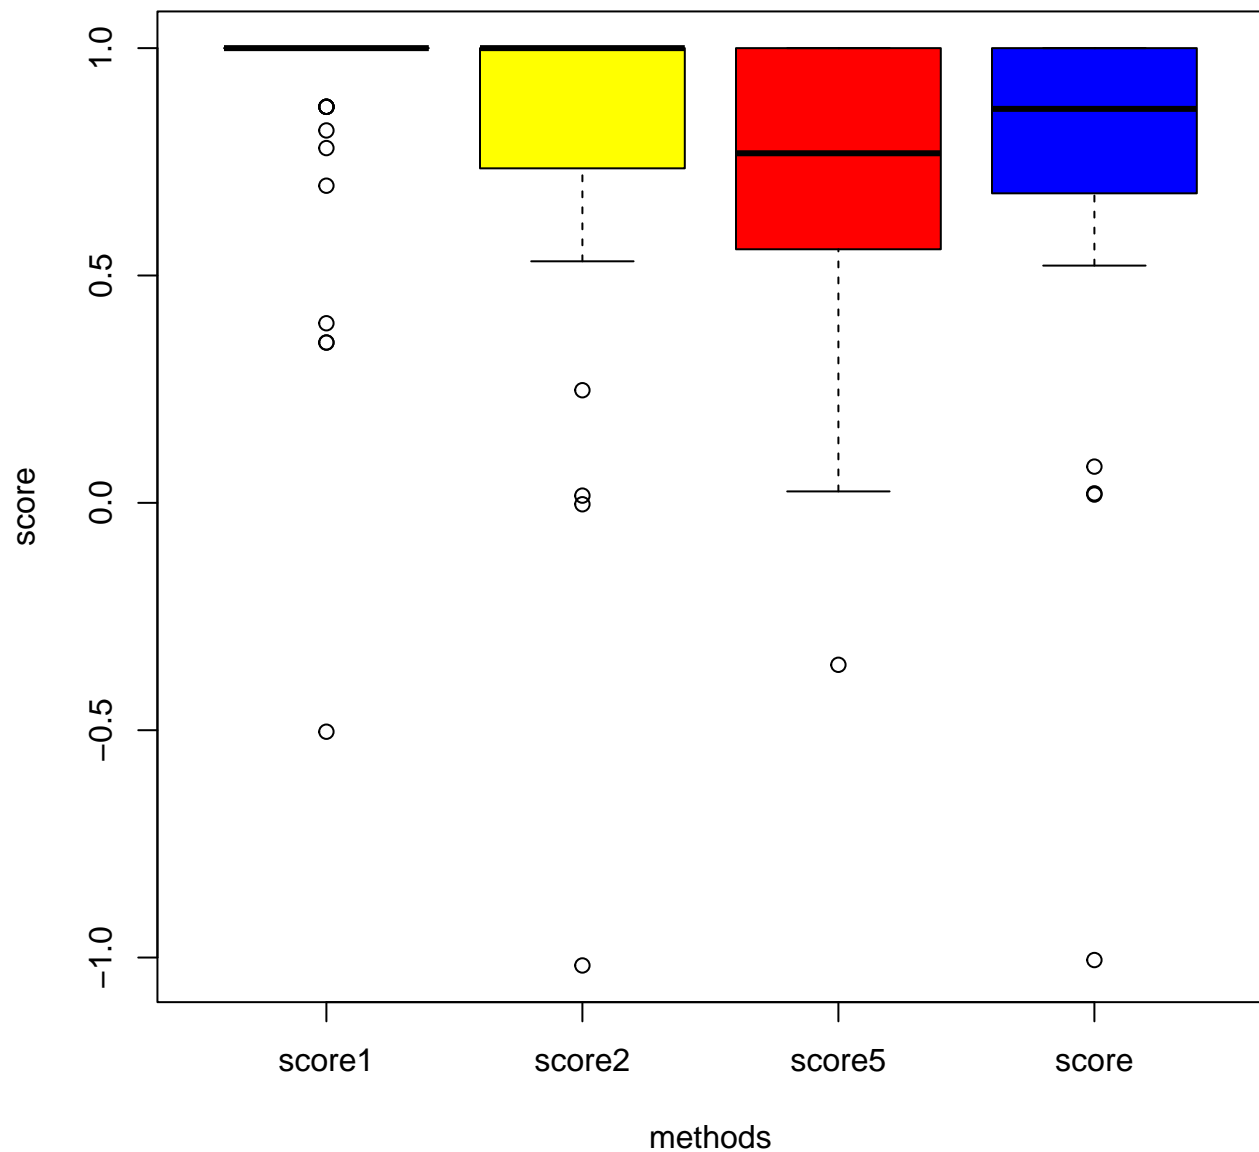

Supplement: s1 [file s1]

# urinary system benign neoplasm\_stability analysis

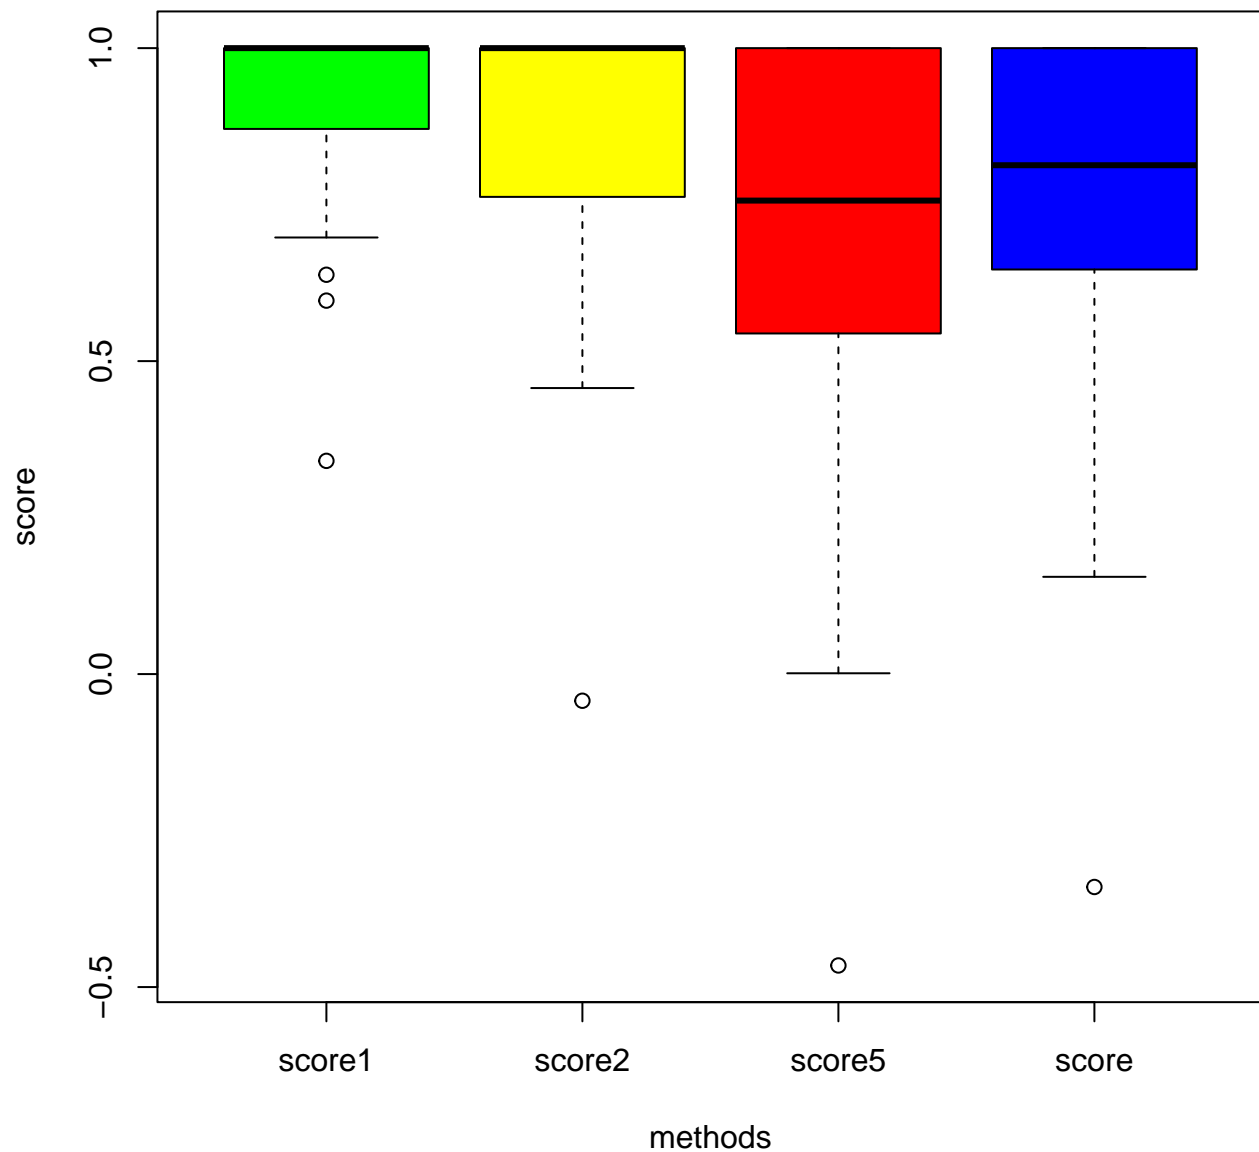

Supplement: s1 [file s1]
